# Supplementary material
Source: ML conference proceedings conference paper supplement (https://openaccess.thecvf.com/content/ACCV2020/html/Raab_Bridging_Adversarial_and_ACCV_2020_paper.html)
Supplement: Supplementary file 10 [file Raab_Bridging_Adversarial_and_ACCV_2020_supplemental.zip]

Archive with 178 entries (129 files):
- 543-supp.aux
- 543-supp.bbl
- 543-supp.blg
- 543-supp.fdb_latexmk
- 543-supp.fls
- 543-supp.log
- 543-supp.pdf
- 543-supp.synctex.gz
- 543-supp.tex
- ASAN_plot_angle.pdf
- CDAN_plot_angle.pdf
- cvpr_eso.sty
- DANN_plot_angle.pdf
- dataset/
- dataset/imageClef/
- dataset/imageClef/c/
- dataset/imageClef/c/0/
- dataset/imageClef/c/0/251_0023.jpg
- dataset/imageClef/c/0/251_0090.jpg
- dataset/imageClef/c/0/251_0115.jpg
- dataset/imageClef/c/1/
- dataset/imageClef/c/1/224_0007.jpg
- dataset/imageClef/c/1/224_0044.jpg
- dataset/imageClef/c/1/224_0067.jpg
- dataset/imageClef/c/2/
- dataset/imageClef/c/2/113_0022.jpg
- dataset/imageClef/c/2/113_0115.jpg
- dataset/imageClef/c/2/113_0116.jpg
- dataset/imageClef/i/
- dataset/imageClef/i/0/
- dataset/imageClef/i/0/n02691156_11729.JPEG
- dataset/imageClef/i/0/n02691156_1806.JPEG
- dataset/imageClef/i/0/n02691156_49198.JPEG
- dataset/imageClef/i/1/
- dataset/imageClef/i/1/n02834778_2737.JPEG
- dataset/imageClef/i/1/n02834778_763.JPEG
- dataset/imageClef/i/1/n02834778_8949.JPEG
- dataset/imageClef/i/2/
- dataset/imageClef/i/2/n01503061_12696.JPEG
- dataset/imageClef/i/2/n01503061_14761.JPEG
- dataset/imageClef/i/2/n01503061_3094.JPEG
- dataset/imageClef/p/
- dataset/imageClef/p/0/
- dataset/imageClef/p/0/2008_005905.jpg
- dataset/imageClef/p/0/2011_002751.jpg
- dataset/imageClef/p/0/2011_002993.jpg
- dataset/imageClef/p/1/
- dataset/imageClef/p/1/2008_005175.jpg
- dataset/imageClef/p/1/2008_007510.jpg
- dataset/imageClef/p/1/2011_000087.jpg
- dataset/imageClef/p/2/
- dataset/imageClef/p/2/2008_007003.jpg
- dataset/imageClef/p/2/2008_007486.jpg
- dataset/imageClef/p/2/2009_003285.jpg
- dataset/Office-31/
- dataset/Office-31/amazon/
- dataset/Office-31/amazon/back_back/
- dataset/Office-31/amazon/back_back/frame_0001.jpg
- dataset/Office-31/amazon/back_back/frame_0002.jpg
- dataset/Office-31/amazon/back_back/frame_0003.jpg
- dataset/Office-31/amazon/bike/
- dataset/Office-31/amazon/bike/frame_0001.jpg
- dataset/Office-31/amazon/bike/frame_0002.jpg
- dataset/Office-31/amazon/bike/frame_0003.jpg
- dataset/Office-31/amazon/desk_lamp/
- dataset/Office-31/amazon/desk_lamp/frame_0001.jpg
- dataset/Office-31/amazon/desk_lamp/frame_0002.jpg
- dataset/Office-31/amazon/desk_lamp/frame_0003.jpg
- dataset/Office-31/dslr/
- dataset/Office-31/dslr/back_pack/
- dataset/Office-31/dslr/back_pack/frame_0001.jpg
- dataset/Office-31/dslr/back_pack/frame_0008.jpg
- dataset/Office-31/dslr/back_pack/frame_0012.jpg
- dataset/Office-31/dslr/bike/
- dataset/Office-31/dslr/bike/frame_0001.jpg
- dataset/Office-31/dslr/bike/frame_0008.jpg
- dataset/Office-31/dslr/bike/frame_0009.jpg
- dataset/Office-31/dslr/desk_lamp/
- dataset/Office-31/dslr/desk_lamp/frame_0004.jpg
- dataset/Office-31/dslr/desk_lamp/frame_0006.jpg
- dataset/Office-31/dslr/desk_lamp/frame_0010.jpg
- dataset/Office-31/webcam/
- dataset/Office-31/webcam/back_pack/
- dataset/Office-31/webcam/back_pack/frame_0007.jpg
- dataset/Office-31/webcam/back_pack/frame_0018.jpg
- dataset/Office-31/webcam/back_pack/frame_0026.jpg
- dataset/Office-31/webcam/bike/
- dataset/Office-31/webcam/bike/frame_0002.jpg
- dataset/Office-31/webcam/bike/frame_0003.jpg
- dataset/Office-31/webcam/bike/frame_0010.jpg
- dataset/Office-31/webcam/desk_lamp/
- dataset/Office-31/webcam/desk_lamp/frame_0006.jpg
- dataset/Office-31/webcam/desk_lamp/frame_0008.jpg
- dataset/Office-31/webcam/desk_lamp/frame_0012.jpg
- dataset/Office-Home/
- dataset/Office-Home/Art/
- dataset/Office-Home/Art/calculator/
- dataset/Office-Home/Art/calculator/00001.jpg
- dataset/Office-Home/Art/calculator/00004.jpg
- dataset/Office-Home/Art/calculator/00006.jpg
- dataset/Office-Home/Art/candles/
- dataset/Office-Home/Art/candles/00064.jpg
- dataset/Office-Home/Art/candles/00065.jpg
- dataset/Office-Home/Art/candles/00068.jpg
- dataset/Office-Home/Art/helmet/
- dataset/Office-Home/Art/helmet/00053.jpg
- dataset/Office-Home/Art/helmet/00073.jpg
- dataset/Office-Home/Art/helmet/00079.jpg
- dataset/Office-Home/Product/
- dataset/Office-Home/Product/calculator/
- dataset/Office-Home/Product/calculator/00013.jpg
- dataset/Office-Home/Product/calculator/00022.jpg
- dataset/Office-Home/Product/calculator/00041.jpg
- dataset/Office-Home/Product/candles/
- dataset/Office-Home/Product/candles/00001.jpg
- dataset/Office-Home/Product/candles/00002.jpg
- dataset/Office-Home/Product/candles/00053.jpg
- dataset/Office-Home/Product/helmet/
- dataset/Office-Home/Product/helmet/00001.jpg
- dataset/Office-Home/Product/helmet/00002.jpg
- dataset/Office-Home/Product/helmet/00035.jpg
- dataset/Office-Home/Real_World/
- dataset/Office-Home/Real_World/calculator/
- dataset/Office-Home/Real_World/calculator/00001.jpg
- dataset/Office-Home/Real_World/calculator/00002.jpg
- dataset/Office-Home/Real_World/calculator/00003.jpg
- dataset/Office-Home/Real_World/candles/
- dataset/Office-Home/Real_World/candles/00068.jpg
- dataset/Office-Home/Real_World/candles/00074.jpg
- dataset/Office-Home/Real_World/candles/00097.jpg
- dataset/Office-Home/Real_World/helmet/
- dataset/Office-Home/Real_World/helmet/00010.jpg
- dataset/Office-Home/Real_World/helmet/00025.jpg
- dataset/Office-Home/Real_World/helmet/00033.jpg
- dataset/visda/
- dataset/visda/real/
- dataset/visda/real/aeroplane/
- dataset/visda/real/aeroplane/aeroplane_156302.jpg
- dataset/visda/real/aeroplane/aeroplane_156317.jpg
- dataset/visda/real/aeroplane/aeroplane_156332.jpg
- dataset/visda/real/car/
- dataset/visda/real/car/car_131741.jpg
- dataset/visda/real/car/car_131760.jpg
- dataset/visda/real/car/car_131776.jpg
- dataset/visda/real/horse/
- dataset/visda/real/horse/horse_53418.jpg
- dataset/visda/real/horse/horse_53430.jpg
- dataset/visda/real/horse/horse_53455.jpg
- dataset/visda/synthetic/
- dataset/visda/synthetic/aeroplane/
- dataset/visda/synthetic/aeroplane/src_1_02691156_1b0b1d2cb9f9d5c0575bd26acccafabd__10_236_150.png
- dataset/visda/synthetic/aeroplane/src_1_02691156_1b0b1d2cb9f9d5c0575bd26acccafabd__44_236_150.png
- dataset/visda/synthetic/aeroplane/src_1_02691156_1b0b1d2cb9f9d5c0575bd26acccafabd__78_349_150.png
- dataset/visda/synthetic/car/
- dataset/visda/synthetic/car/src_1_02958343_1abeca7159db7ed9f200a72c9245aee7__10_349_150.png
- dataset/visda/synthetic/car/src_1_02958343_1abeca7159db7ed9f200a72c9245aee7__44_10_150.png
- dataset/visda/synthetic/car/src_1_02958343_1abeca7159db7ed9f200a72c9245aee7__61_123_165.png
- dataset/visda/synthetic/horse/
- dataset/visda/synthetic/horse/src_3_1511__27_123_165.png
- dataset/visda/synthetic/horse/src_3_1511__44_236_150.png
- dataset/visda/synthetic/horse/src_3_1511__78_236_150.png
- eso-pic.sty
- library.bib
- llncs.cls
- llncsdoc.pdf
- plot_hyperparmeter.pdf
- plot_target_acc.pdf
- plot_train_test.pdf
- plot_transfer.pdf
- plot_transfer_ic.pdf
- ruler.sty
- splncs.bst
- tsne_ASAN_classification_.pdf
- tsne_ASAN_features_domain_.pdf
- tsne_CDAN_classification_.pdf
- tsne_CDAN_features_domain_.pdf
- tsne_DANN_classification_.pdf
- tsne_DANN_features_domain_.pdf
