# Supplementary material
Source: ML conference proceedings conference paper supplement (https://openaccess.thecvf.com/content/ACCV2020/html/Raab_Bridging_Adversarial_and_ACCV_2020_paper.html)
Supplement: Supplementary file 10 [file Raab_Bridging_Adversarial_and_ACCV_2020_supplemental.zip › 543-supp.aux]

\relax 
\citation{Peng2018a}
\citation{DBLP:conf/icml/GaninL15}
\citation{pmlr-v97-chen19i}
\citation{pmlr-v97-chen19i}
\citation{DBLP:conf/icml/GaninL15}
\citation{DBLP:conf/nips/LongC0J18}
\citation{office31}
\citation{DBLP:conf/icml/GaninL15}
\citation{pmlr-v97-chen19i}
\citation{DBLP:conf/icml/GaninL15}
\citation{pmlr-v97-chen19i}
\citation{DBLP:conf/nips/LongC0J18}
\citation{pmlr-v97-chen19i}
\citation{DBLP:conf/icml/GaninL15}
\citation{DBLP:conf/icml/GaninL15}
\citation{DBLP:conf/nips/LongC0J18}
\citation{DBLP:conf/nips/LongC0J18}
\citation{DBLP:conf/icml/GaninL15}
\citation{DBLP:conf/nips/LongC0J18}
\citation{office31}
\citation{DBLP:conf/icml/GaninL15}
\citation{DBLP:conf/nips/LongC0J18}
\citation{office31}
\@writefile{toc}{\contentsline {title}{Supplementary Material: Bridging Adversarial and Statistical Domain Transfer via Spectral Adaptation Networks }{1}}
\@writefile{toc}{\authcount {4}}
\@writefile{toc}{\contentsline {author}{Christoph Raab \and Philipp V\"ath \and Peter Meier \and Frank-Michael Schleif}{1}}
\@writefile{toc}{\contentsline {section}{\numberline {1}Introduction}{1}}
\@writefile{toc}{\contentsline {section}{\numberline {2}Additional Results of Subspace Analysis}{1}}
\newlabel{sec:add_subspace}{{2}{1}}
\providecommand*\caption@xref[2]{\@setref\relax\@undefined{#1}}
\newlabel{fig:rad_dann}{{1a}{2}}
\newlabel{sub@fig:rad_dann}{{a}{2}}
\newlabel{fig:rad_cdan}{{1b}{2}}
\newlabel{sub@fig:rad_cdan}{{b}{2}}
\newlabel{fig:rad_asan}{{1c}{2}}
\newlabel{sub@fig:rad_asan}{{c}{2}}
\@writefile{lof}{\contentsline {figure}{\numberline {1}{\ignorespaces Cosine angle in rad of singular vectors associated to the first 100 largest singular values between the source and target bottleneck feature output of the trained DANN \cite  {DBLP:conf/icml/GaninL15}, CDAN \cite  {DBLP:conf/nips/LongC0J18}, and our ASAN. The data is obtained using \textbf  {A}$\to $\textbf  {W} images from the Office-31 \cite  {office31} dataset. The red line shows the mean rad. The plot indicates a better distribution of subspace similarities between the singular vectors of associated large and mid-size singular values of ASAN features. Best viewed on a computer display.\relax }}{2}}
\newlabel{fig:rads}{{1}{2}}
\@writefile{toc}{\contentsline {section}{\numberline {3}Ablation Study}{2}}
\newlabel{sec:ablation}{{3}{2}}
\citation{Bergstra2012a}
\citation{Zhong2010}
\citation{pmlr-v97-chen19i}
\citation{NIPS2019_8466}
\citation{NIPS2019_8466}
\citation{pmlr-v97-liu19b}
\citation{pmlr-v97-chen19i}
\citation{NIPS2019_8470}
\citation{Xu2019b}
\@writefile{lot}{\contentsline {table}{\numberline {1}{\ignorespaces Result of the Ablation study as mean prediction \textbf  {accuracy} with standard deviation on the \textbf  {Office-31} dataset over three random runs.\relax }}{3}}
\newlabel{tab:ablation}{{1}{3}}
\@writefile{toc}{\contentsline {section}{\numberline {4}Hyperparameter Tuning and Behavior}{3}}
\newlabel{sec:paramter_behaviour}{{4}{3}}
\citation{Peng2018a}
\citation{Peng2018a}
\@writefile{lof}{\contentsline {figure}{\numberline {2}{\ignorespaces Influence of the Hyperparameter $k$ on the prediction performance of ASAN in accuracy with the best mean performance at $k=11$. Best viewed on a computer display.\relax }}{4}}
\newlabel{fig:parameter_behaviour}{{2}{4}}
\@writefile{toc}{\contentsline {section}{\numberline {5}Additional Experimental Results on VisDa}{4}}
\newlabel{sec:additional_results}{{5}{4}}
\@writefile{lot}{\contentsline {table}{\numberline {2}{\ignorespaces \textbf  {Mean} prediction \textbf  {accuracy} with standard deviation on the \textbf  {VisDa} dataset over three random runs. Results separated by baseline network ResNet-50 and ResNet-101 .\relax }}{4}}
\newlabel{tab:visda_results}{{2}{4}}
\citation{pmlr-v97-chen19i}
\citation{kifer2004detecting,NIPS2006_2983}
\citation{pmlr-v97-chen19i}
\citation{pmlr-v97-chen19i}
\citation{pmlr-v97-chen19i}
\citation{pmlr-v97-chen19i}
\citation{kifer2004detecting,NIPS2006_2983}
\citation{pmlr-v97-chen19i}
\citation{DBLP:conf/nips/LongC0J18}
\citation{DBLP:conf/icml/GaninL15}
\citation{miyato2018spectral}
\citation{miyato2018spectral}
\citation{miyato2018spectral}
\citation{Zhao2020}
\citation{miyato2018spectral}
\@writefile{toc}{\contentsline {section}{\numberline {6}Additional Results of Convergence and Spectral Analysis}{5}}
\newlabel{sec:add_conv}{{6}{5}}
\citation{DBLP:conf/icml/GaninL15}
\citation{DBLP:conf/nips/LongC0J18}
\citation{DBLP:conf/icml/GaninL15}
\citation{DBLP:conf/nips/LongC0J18}
\citation{DBLP:conf/icml/GaninL15}
\citation{DBLP:conf/nips/LongC0J18}
\citation{DBLP:conf/nips/LongC0J18}
\citation{DBLP:conf/icml/GaninL15}
\newlabel{fig:a_rsl}{{3a}{6}}
\newlabel{sub@fig:a_rsl}{{a}{6}}
\newlabel{fig:trend_target}{{3b}{6}}
\newlabel{sub@fig:trend_target}{{b}{6}}
\newlabel{fig:source_test}{{3c}{6}}
\newlabel{sub@fig:source_test}{{c}{6}}
\@writefile{lof}{\contentsline {figure}{\numberline {3}{\ignorespaces Learning process of our ASAN compared to related networks over time given \textbf  {P}$\to $\textbf  {I} images from Image-Clef dataset. Best viewed on computer display.\relax }}{6}}
\newlabel{fig:convergence}{{3}{6}}
\@writefile{toc}{\contentsline {section}{\numberline {7}Additional Results of Feature Analysis}{6}}
\newlabel{sec:add_feature}{{7}{6}}
\citation{vanDerMaaten.2008}
\citation{vanDerMaaten.2008}
\citation{office31}
\citation{Venkateswara2017}
\citation{Peng2018a}
\citation{office31}
\citation{office31}
\citation{Venkateswara2017}
\citation{Venkateswara2017}
\citation{office31}
\citation{Peng2018a}
\citation{Peng2018a}
\citation{Venkateswara2017}
\citation{office31}
\citation{office31}
\newlabel{fig:tsne_dann_d}{{4a}{7}}
\newlabel{sub@fig:tsne_dann_d}{{a}{7}}
\newlabel{fig:tsne_cdan_d}{{4b}{7}}
\newlabel{sub@fig:tsne_cdan_d}{{b}{7}}
\newlabel{fig:tsne_asan_d}{{4c}{7}}
\newlabel{sub@fig:tsne_asan_d}{{c}{7}}
\newlabel{fig:tsne_dann_c}{{4d}{7}}
\newlabel{sub@fig:tsne_dann_c}{{d}{7}}
\newlabel{fig:tsne_cdan_c}{{4e}{7}}
\newlabel{sub@fig:tsne_cdan_c}{{e}{7}}
\newlabel{fig:tsne_asan_c}{{4f}{7}}
\newlabel{sub@fig:tsne_asan_c}{{f}{7}}
\@writefile{lof}{\contentsline {figure}{\numberline {4}{\ignorespaces T-SNE \cite  {vanDerMaaten.2008} of bottleneck features of selected networks given \textbf  {P}$\to $\textbf  {I} images from the Image-Clef dataset. $<$Name$>_d$ and $<$Name$>_c$ show the outputs with ground truth domain and classification labels respectively. For the first row, blue shows the source, and red shows the target domain. Best viewed in color.\relax }}{7}}
\newlabel{fig:tsne}{{4}{7}}
\@writefile{toc}{\contentsline {section}{\numberline {8}Examples from Benchmark Datasets}{7}}
\newlabel{sec:examples}{{8}{7}}
\citation{Venkateswara2017}
\citation{Venkateswara2017}
\citation{Peng2018a}
\citation{Peng2018a}
\@writefile{lot}{\contentsline {table}{\numberline {3}{\ignorespaces Example images from the Office-31 \cite  {office31} datasets. The objects shown capture the domain shift via difficult examples. Row caption is class name and column caption is domain name.\relax }}{8}}
\newlabel{tab:office31}{{3}{8}}
\@writefile{lot}{\contentsline {table}{\numberline {4}{\ignorespaces Example images from the Image-Clef datasets. The objects shown capture the domain shift via difficult examples. Row caption is class name and column caption is domain name.\relax }}{8}}
\newlabel{tab:imageclef}{{4}{8}}
\@writefile{lot}{\contentsline {table}{\numberline {5}{\ignorespaces Example images from the Office-Home \cite  {Venkateswara2017} datasets. The objects shown capture the domain shift via difficult examples. Row caption is class name and column caption is domain name.\relax }}{9}}
\newlabel{tab:officehome}{{5}{9}}
\@writefile{lot}{\contentsline {table}{\numberline {6}{\ignorespaces Example images from the VisDa \cite  {Peng2018a} datasets. The objects shown capture the domain shift via difficult examples. Row caption is class name and column caption is domain name.\relax }}{9}}
\newlabel{tab:visda}{{6}{9}}
\bibstyle{splncs}
\bibdata{library}
\bibcite{Peng2018a}{1}
\bibcite{DBLP:conf/icml/GaninL15}{2}
\bibcite{pmlr-v97-chen19i}{3}
\bibcite{DBLP:conf/nips/LongC0J18}{4}
\bibcite{office31}{5}
\bibcite{Bergstra2012a}{6}
\bibcite{Zhong2010}{7}
\bibcite{NIPS2019_8466}{8}
\bibcite{pmlr-v97-liu19b}{9}
\bibcite{NIPS2019_8470}{10}
\bibcite{Xu2019b}{11}
\bibcite{kifer2004detecting}{12}
\bibcite{NIPS2006_2983}{13}
\bibcite{miyato2018spectral}{14}
\bibcite{Zhao2020}{15}
\bibcite{vanDerMaaten.2008}{16}
\bibcite{Venkateswara2017}{17}
