# Supplementary material
Source: ML conference proceedings conference paper supplement (https://openaccess.thecvf.com/content/ACCV2020/html/Raab_Bridging_Adversarial_and_ACCV_2020_paper.html)
Supplement: Supplementary file 10 [file Raab_Bridging_Adversarial_and_ACCV_2020_supplemental.zip › 543-supp.bbl]

\begin{thebibliography}{10}

\bibitem{Peng2018a}
Peng, X., Usman, B., Kaushik, N., Wang, D., Hoffman, J., Saenko, K.:
\newblock {VisDA: A Synthetic-to-Real Benchmark for Visual Domain Adaptation}.
\newblock In: 2018 IEEE/CVF Conference on Computer Vision and Pattern
  Recognition Workshops (CVPRW). Volume 2018-June., IEEE (2018)  2134--2139

\bibitem{DBLP:conf/icml/GaninL15}
Ganin, Y., Lempitsky, V.S.:
\newblock {Unsupervised Domain Adaptation by Backpropagation}.
\newblock In: Proceedings of the 32nd International Conference on Machine
  Learning, ICLR 2015, Lille, France, 6-11 July 2015. (2015)  1180--1189

\bibitem{pmlr-v97-chen19i}
Chen, X., Wang, S., Long, M., Wang, J.:
\newblock {Transferability vs. Discriminability: Batch Spectral Penalization
  for Adversarial Domain Adaptation}.
\newblock In Chaudhuri, K., Salakhutdinov, R., eds.: Proceedings of the 36th
  International Conference on Machine Learning. Volume~97 of Proceedings of
  Machine Learning Research., Long Beach, California, USA, PMLR (2019)
  1081--1090

\bibitem{DBLP:conf/nips/LongC0J18}
Long, M., Cao, Z., Wang, J., Jordan, M.I.:
\newblock {Conditional Adversarial Domain Adaptation}.
\newblock In: Advances in Neural Information Processing Systems 31: Annual
  Conference on Neural Information Processing Systems 2018, NeurIPS 2018, 3-8
  December 2018, Montr{\'{e}}al, Canada. (2018)  1647--1657

\bibitem{office31}
Saenko, K., Kulis, B., Fritz, M., Darrell, T.:
\newblock {Adapting Visual Category Models to New Domains}.
\newblock In Daniilidis, K., Maragos, P., Paragios, N., eds.: Computer Vision
  -- ECCV 2010, Berlin, Heidelberg, Springer Berlin Heidelberg (2010)  213--226

\bibitem{Bergstra2012a}
Bergstra, J., Bengio, Y.:
\newblock {Random search for hyper-parameter optimization}.
\newblock Journal of Machine Learning Research \textbf{13} (2012)  281--305

\bibitem{Zhong2010}
Zhong, E., Fan, W., Yang, Q., Verscheure, O., Ren, J.:
\newblock {Cross validation framework to choose amongst models and datasets for
  transfer learning}.
\newblock Lecture Notes in Computer Science (including subseries Lecture Notes
  in Artificial Intelligence and Lecture Notes in Bioinformatics) \textbf{6323
  LNAI} (2010)  547--562

\bibitem{NIPS2019_8466}
Chen, X., Wang, S., Fu, B., Long, M., Wang, J.:
\newblock {Catastrophic Forgetting Meets Negative Transfer: Batch Spectral
  Shrinkage for Safe Transfer Learning}.
\newblock In Wallach, H., Larochelle, H., Beygelzimer, A., d'Alch{\'{e}} Buc,
  F., Fox, E., Garnett, R., eds.: Advances in Neural Information Processing
  Systems 32.
\newblock Curran Associates, Inc. (2019)  1908--1918

\bibitem{pmlr-v97-liu19b}
Liu, H., Long, M., Wang, J., Jordan, M.:
\newblock {Transferable Adversarial Training: A General Approach to Adapting
  Deep Classifiers}.
\newblock In Chaudhuri, K., Salakhutdinov, R., eds.: Proceedings of the 36th
  International Conference on Machine Learning. Volume~97 of Proceedings of
  Machine Learning Research., Long Beach, California, USA, PMLR (2019)
  4013--4022

\bibitem{NIPS2019_8470}
Wang, X., Jin, Y., Long, M., Wang, J., Jordan, M.I.:
\newblock {Transferable Normalization: Towards Improving Transferability of
  Deep Neural Networks}.
\newblock In Wallach, H., Larochelle, H., Beygelzimer, A.,
  d$\backslash$textquotesingle Alch{\'{e}}-Buc, F., Fox, E., Garnett, R., eds.:
  Advances in Neural Information Processing Systems 32.
\newblock Curran Associates, Inc. (2019)  1951--1961

\bibitem{Xu2019b}
Xu, R., Li, G., Yang, J., Lin, L.:
\newblock {Larger Norm More Transferable: An Adaptive Feature Norm Approach for
  Unsupervised Domain Adaptation}.
\newblock In: 2019 IEEE/CVF International Conference on Computer Vision (ICCV).
  Volume 2019-Octob., IEEE (2019)  1426--1435

\bibitem{kifer2004detecting}
Kifer, D., Ben-David, S., Gehrke, J.:
\newblock {Detecting change in data streams}.
\newblock In: Proceedings of the Thirtieth International Conference on Very
  Large Data Bases - Volume 30. VLDB '04, VLDB Endowment (2004)  180--191

\bibitem{NIPS2006_2983}
Ben-David, S., Blitzer, J., Crammer, K., Pereira, F.:
\newblock {Analysis of Representations for Domain Adaptation}.
\newblock In Sch{\"{o}}lkopf, B., Platt, J.C., Hoffman, T., eds.: Advances in
  Neural Information Processing Systems 19.
\newblock MIT Press (2007)  137--144

\bibitem{miyato2018spectral}
Miyato, T., Kataoka, T., Koyama, M., Yoshida, Y.:
\newblock {Spectral Normalization for Generative Adversarial Networks}.
\newblock In: International Conference on Learning Representations. (2018)

\bibitem{Zhao2020}
Zhao, L., Liu, Y.:
\newblock {Spectral Normalization for Domain Adaptation}.
\newblock Information \textbf{11} (2020)

\bibitem{vanDerMaaten.2008}
{Laurens van der Maaten}, {Geoffrey E.}, H.:
\newblock {Visualizing Data using t-SNE}.
\newblock Journal of Machine Learning Research \textbf{164} (2008) ~10

\bibitem{Venkateswara2017}
Venkateswara, H., Eusebio, J., Chakraborty, S., Panchanathan, S.:
\newblock {Deep Hashing Network for Unsupervised Domain Adaptation}.
\newblock In: 2017 IEEE Conference on Computer Vision and Pattern Recognition
  (CVPR). Volume 2017-Janua., IEEE (2017)  5385--5394

\end{thebibliography}
