# Supplementary material
Source: ML conference proceedings conference paper supplement (https://openaccess.thecvf.com/content/ACCV2020/html/Raab_Bridging_Adversarial_and_ACCV_2020_paper.html)
Supplement: Supplementary file 10 [file Raab_Bridging_Adversarial_and_ACCV_2020_supplemental.zip › 543-supp.blg]

This is BibTeX, Version 0.99dThe top-level auxiliary file: 543-supp.aux
The style file: splncs.bst
Database file #1: library.bib
