# Supplementary material
Source: ML conference proceedings conference paper supplement (https://openaccess.thecvf.com/content/ACCV2020/html/Raab_Bridging_Adversarial_and_ACCV_2020_paper.html)
Supplement: Supplementary file 10 [file Raab_Bridging_Adversarial_and_ACCV_2020_supplemental.zip › 543-supp.fdb_latexmk]

# Fdb version 3
["bibtex 543-supp"] 1601538238 "543-supp.aux" "543-supp.bbl" "543-supp" 1601538981
  "./splncs.bst" 1601304962 20228 d8372efc3b8fb4929dda1e6925aef454 ""
  "543-supp.aux" 1601538240 8670 a14258221b64742a2efbd5d23bd0d5ec ""
  "library.bib" 1601538117 769750 76687e29c7e0955abb8a2ae22861d632 ""
  (generated)
  "543-supp.blg"
  "543-supp.bbl"
["pdflatex"] 1601538238 "c:/Users/chris/Documents/Paper/Accepted/2020_ACCV_ASAN/0543-supp/543-supp.tex" "c:/Users/chris/Documents/Paper/Accepted/2020_ACCV_ASAN/0543-supp/543-supp.pdf" "543-supp" 1601538981
  "543-supp.aux" 1601538240 8670 a14258221b64742a2efbd5d23bd0d5ec ""
  "543-supp.bbl" 1601538238 5304 1ff3bfa77ee06219b7c478f416b68abd "bibtex 543-supp"
  "543-supp.tex" 1601538265 37473 cc98f96bcdf8ace3764f1f526203a066 ""
  "ASAN_plot_angle.pdf" 1601304962 16370 04bd0cf115bbad1ed2e479dc14d8c45b ""
  "C:/Users/chris/AppData/Local/MiKTeX/2.9/miktex/data/le/pdftex/pdflatex.fmt" 1528097287 4080154 6403db243df47608d426c0161b57aa17 ""
  "C:/Users/chris/AppData/Local/MiKTeX/2.9/pdftex/config/pdftex.map" 1599116384 126307 de2fdcdcb06a59cef836c6a4c9cb31db ""
  "C:/Users/chris/AppData/Local/Programs/MiKTeX 2.9/fonts/tfm/public/amsfonts/cmextra/cmex7.tfm" 1233955448 1004 54797486969f23fa377b128694d548df ""
  "C:/Users/chris/AppData/Local/Programs/MiKTeX 2.9/fonts/tfm/public/amsfonts/cmextra/cmex9.tfm" 1234368820 996 a18840b13b499c08ac2de96a99eda4bc ""
  "C:/Users/chris/AppData/Local/Programs/MiKTeX 2.9/fonts/tfm/public/amsfonts/symbols/msam10.tfm" 1233955454 916 f87d7c45f9c908e672703b83b72241a3 ""
  "C:/Users/chris/AppData/Local/Programs/MiKTeX 2.9/fonts/tfm/public/amsfonts/symbols/msam5.tfm" 1233955454 924 9904cf1d39e9767e7a3622f2a125a565 ""
  "C:/Users/chris/AppData/Local/Programs/MiKTeX 2.9/fonts/tfm/public/amsfonts/symbols/msam7.tfm" 1233955454 928 2dc8d444221b7a635bb58038579b861a ""
  "C:/Users/chris/AppData/Local/Programs/MiKTeX 2.9/fonts/tfm/public/amsfonts/symbols/msbm10.tfm" 1233955454 908 2921f8a10601f252058503cc6570e581 ""
  "C:/Users/chris/AppData/Local/Programs/MiKTeX 2.9/fonts/tfm/public/amsfonts/symbols/msbm5.tfm" 1233955454 940 75ac932a52f80982a9f8ea75d03a34cf ""
  "C:/Users/chris/AppData/Local/Programs/MiKTeX 2.9/fonts/tfm/public/amsfonts/symbols/msbm7.tfm" 1233955454 940 228d6584342e91276bf566bcf9716b83 ""
  "C:/Users/chris/AppData/Local/Programs/MiKTeX 2.9/fonts/tfm/public/cm/cmbx10.tfm" 1136768653 1328 c834bbb027764024c09d3d2bf908b5f0 ""
  "C:/Users/chris/AppData/Local/Programs/MiKTeX 2.9/fonts/tfm/public/cm/cmbx12.tfm" 1136768653 1324 c910af8c371558dc20f2d7822f66fe64 ""
  "C:/Users/chris/AppData/Local/Programs/MiKTeX 2.9/fonts/tfm/public/cm/cmbx5.tfm" 1136768653 1332 f817c21a1ba54560425663374f1b651a ""
  "C:/Users/chris/AppData/Local/Programs/MiKTeX 2.9/fonts/tfm/public/cm/cmbx6.tfm" 1136768653 1344 8a0be4fe4d376203000810ad4dc81558 ""
  "C:/Users/chris/AppData/Local/Programs/MiKTeX 2.9/fonts/tfm/public/cm/cmbx7.tfm" 1136768653 1336 3125ccb448c1a09074e3aa4a9832f130 ""
  "C:/Users/chris/AppData/Local/Programs/MiKTeX 2.9/fonts/tfm/public/cm/cmbx9.tfm" 1136768653 1328 5442e22a7072966dbaf88ca900acf3f0 ""
  "C:/Users/chris/AppData/Local/Programs/MiKTeX 2.9/fonts/tfm/public/cm/cmmi6.tfm" 1136768653 1512 f21f83efb36853c0b70002322c1ab3ad ""
  "C:/Users/chris/AppData/Local/Programs/MiKTeX 2.9/fonts/tfm/public/cm/cmmi9.tfm" 1136768653 1524 d89e2d087a9828407a196f428428ef4a ""
  "C:/Users/chris/AppData/Local/Programs/MiKTeX 2.9/fonts/tfm/public/cm/cmr12.tfm" 1136768653 1288 655e228510b4c2a1abe905c368440826 ""
  "C:/Users/chris/AppData/Local/Programs/MiKTeX 2.9/fonts/tfm/public/cm/cmr6.tfm" 1136768653 1300 b62933e007d01cfd073f79b963c01526 ""
  "C:/Users/chris/AppData/Local/Programs/MiKTeX 2.9/fonts/tfm/public/cm/cmr9.tfm" 1136768653 1292 6b21b9c2c7bebb38aa2273f7ca0fb3af ""
  "C:/Users/chris/AppData/Local/Programs/MiKTeX 2.9/fonts/tfm/public/cm/cmsy6.tfm" 1136768653 1116 933a60c408fc0a863a92debe84b2d294 ""
  "C:/Users/chris/AppData/Local/Programs/MiKTeX 2.9/fonts/tfm/public/cm/cmsy9.tfm" 1136768653 1116 25a7bf822c58caf309a702ef79f4afbb ""
  "C:/Users/chris/AppData/Local/Programs/MiKTeX 2.9/fonts/tfm/public/cm/cmti10.tfm" 1136768653 1480 aa8e34af0eb6a2941b776984cf1dfdc4 ""
  "C:/Users/chris/AppData/Local/Programs/MiKTeX 2.9/fonts/tfm/public/cm/cmtt9.tfm" 1136768653 764 c98a2af25c99b73a368cf7336e255190 ""
  "C:/Users/chris/AppData/Local/Programs/MiKTeX 2.9/fonts/type1/public/amsfonts/cm/cmbx10.pfb" 1247596666 34811 78b52f49e893bcba91bd7581cdc144c0 ""
  "C:/Users/chris/AppData/Local/Programs/MiKTeX 2.9/fonts/type1/public/amsfonts/cm/cmbx12.pfb" 1247596666 32080 340ef9bf63678554ee606688e7b5339d ""
  "C:/Users/chris/AppData/Local/Programs/MiKTeX 2.9/fonts/type1/public/amsfonts/cm/cmbx9.pfb" 1247596667 32298 c6d25bb16d1eac01ebdc6d7084126a1e ""
  "C:/Users/chris/AppData/Local/Programs/MiKTeX 2.9/fonts/type1/public/amsfonts/cm/cmmi10.pfb" 1247596667 36299 5f9df58c2139e7edcf37c8fca4bd384d ""
  "C:/Users/chris/AppData/Local/Programs/MiKTeX 2.9/fonts/type1/public/amsfonts/cm/cmmi6.pfb" 1247596666 37166 8ab3487cbe3ab49ebce74c29ea2418db ""
  "C:/Users/chris/AppData/Local/Programs/MiKTeX 2.9/fonts/type1/public/amsfonts/cm/cmmi7.pfb" 1247596667 36281 c355509802a035cadc5f15869451dcee ""
  "C:/Users/chris/AppData/Local/Programs/MiKTeX 2.9/fonts/type1/public/amsfonts/cm/cmr10.pfb" 1247596667 35752 024fb6c41858982481f6968b5fc26508 ""
  "C:/Users/chris/AppData/Local/Programs/MiKTeX 2.9/fonts/type1/public/amsfonts/cm/cmr7.pfb" 1247596667 32762 7fee39e011c23b3589931effd97b9702 ""
  "C:/Users/chris/AppData/Local/Programs/MiKTeX 2.9/fonts/type1/public/amsfonts/cm/cmr9.pfb" 1247596666 33993 9b89b85fd2d9df0482bd47194d1d3bf3 ""
  "C:/Users/chris/AppData/Local/Programs/MiKTeX 2.9/fonts/type1/public/amsfonts/cm/cmsy10.pfb" 1247596667 32569 5e5ddc8df908dea60932f3c484a54c0d ""
  "C:/Users/chris/AppData/Local/Programs/MiKTeX 2.9/fonts/type1/public/amsfonts/cm/cmsy7.pfb" 1247596666 32716 08e384dc442464e7285e891af9f45947 ""
  "C:/Users/chris/AppData/Local/Programs/MiKTeX 2.9/fonts/type1/public/amsfonts/cm/cmsy9.pfb" 1247596666 32442 c975af247b6702f7ca0c299af3616b80 ""
  "C:/Users/chris/AppData/Local/Programs/MiKTeX 2.9/fonts/type1/public/amsfonts/cm/cmti10.pfb" 1247596667 37944 359e864bd06cde3b1cf57bb20757fb06 ""
  "C:/Users/chris/AppData/Local/Programs/MiKTeX 2.9/fonts/type1/public/amsfonts/cm/cmtt9.pfb" 1247596667 29078 718ea4567ceff944262b0f5b0800e1d9 ""
  "C:/Users/chris/AppData/Local/Programs/MiKTeX 2.9/tex/context/base/supp-pdf.mkii" 1306918461 71592 fe353e1fbd982ffc647f3e98ff74da96 ""
  "C:/Users/chris/AppData/Local/Programs/MiKTeX 2.9/tex/generic/genmisc/nth.sty" 1014877260 1845 5470bde4e3ac5a8928ae0f9e1fbb74b2 ""
  "C:/Users/chris/AppData/Local/Programs/MiKTeX 2.9/tex/generic/oberdiek/etexcmds.sty" 1516841686 7612 729a8cc22a1ee0029997c7f74717ae05 ""
  "C:/Users/chris/AppData/Local/Programs/MiKTeX 2.9/tex/generic/oberdiek/ifluatex.sty" 1516841686 7324 2310d1247db0114eb4726807c8837a0e ""
  "C:/Users/chris/AppData/Local/Programs/MiKTeX 2.9/tex/generic/oberdiek/ifpdf.sty" 1516841686 1251 d170e11a3246c3392bc7f59595af42cb ""
  "C:/Users/chris/AppData/Local/Programs/MiKTeX 2.9/tex/generic/oberdiek/infwarerr.sty" 1516841686 8253 473e0e41f9adadb1977e8631b8f72ea6 ""
  "C:/Users/chris/AppData/Local/Programs/MiKTeX 2.9/tex/generic/oberdiek/kvdefinekeys.sty" 1516841687 5152 b67a3a964ad9851e095110c854a1d461 ""
  "C:/Users/chris/AppData/Local/Programs/MiKTeX 2.9/tex/generic/oberdiek/kvsetkeys.sty" 1516841687 14040 ac8866aac45982ac84021584b0abb252 ""
  "C:/Users/chris/AppData/Local/Programs/MiKTeX 2.9/tex/generic/oberdiek/ltxcmds.sty" 1516841687 18425 5b3c0c59d76fac78978b5558e83c1f36 ""
  "C:/Users/chris/AppData/Local/Programs/MiKTeX 2.9/tex/generic/oberdiek/pdftexcmds.sty" 1516841687 20151 787afc7acba22d228640bdc06ce1177c ""
  "C:/Users/chris/AppData/Local/Programs/MiKTeX 2.9/tex/latex/amsfonts/amsfonts.sty" 1358201372 5949 3f3fd50a8cc94c3d4cbf4fc66cd3df1c ""
  "C:/Users/chris/AppData/Local/Programs/MiKTeX 2.9/tex/latex/amsfonts/amssymb.sty" 1358201372 13829 94730e64147574077f8ecfea9bb69af4 ""
  "C:/Users/chris/AppData/Local/Programs/MiKTeX 2.9/tex/latex/amsfonts/umsa.fd" 1358201372 961 6518c6525a34feb5e8250ffa91731cff ""
  "C:/Users/chris/AppData/Local/Programs/MiKTeX 2.9/tex/latex/amsfonts/umsb.fd" 1358201372 961 d02606146ba5601b5645f987c92e6193 ""
  "C:/Users/chris/AppData/Local/Programs/MiKTeX 2.9/tex/latex/amsmath/amsbsy.sty" 1504975225 2282 5c54ab129b848a5071554186d0168766 ""
  "C:/Users/chris/AppData/Local/Programs/MiKTeX 2.9/tex/latex/amsmath/amsgen.sty" 1504975226 4296 c115536cf8d4ff25aa8c1c9bc4ecb79a ""
  "C:/Users/chris/AppData/Local/Programs/MiKTeX 2.9/tex/latex/amsmath/amsmath.sty" 1504975226 87173 897a476d96a0681047a5b0f91178a3d2 ""
  "C:/Users/chris/AppData/Local/Programs/MiKTeX 2.9/tex/latex/amsmath/amsopn.sty" 1504975226 4232 318a66090112f3aa3f415aeb6fe8540f ""
  "C:/Users/chris/AppData/Local/Programs/MiKTeX 2.9/tex/latex/amsmath/amstext.sty" 1504975226 2507 fe3078ec12fc30287f568596f8e0b948 ""
  "C:/Users/chris/AppData/Local/Programs/MiKTeX 2.9/tex/latex/base/article.cls" 1492214938 19821 310da678527a7dfe2a02c88af38079b7 ""
  "C:/Users/chris/AppData/Local/Programs/MiKTeX 2.9/tex/latex/base/inputenc.sty" 1492214946 4732 d63eda807ac82cca2ca8488efd31a966 ""
  "C:/Users/chris/AppData/Local/Programs/MiKTeX 2.9/tex/latex/base/size10.clo" 1492214938 8292 e897c12e1e886ce77fe26afc5d470886 ""
  "C:/Users/chris/AppData/Local/Programs/MiKTeX 2.9/tex/latex/base/textcomp.sty" 1492214948 16154 f2c73e20ca771d534a8516c62c6b0eae ""
  "C:/Users/chris/AppData/Local/Programs/MiKTeX 2.9/tex/latex/base/ts1cmr.fd" 1492214944 2217 d274654bda1292013bdf48d5f720a495 ""
  "C:/Users/chris/AppData/Local/Programs/MiKTeX 2.9/tex/latex/base/ts1enc.def" 1492214942 7767 aa88823823f5e767d79ea1166ab1ae74 ""
  "C:/Users/chris/AppData/Local/Programs/MiKTeX 2.9/tex/latex/caption/caption.sty" 1527494577 66287 4d41f8426c88e7e3befa3751d10eee3f ""
  "C:/Users/chris/AppData/Local/Programs/MiKTeX 2.9/tex/latex/caption/caption3.sty" 1527494577 66886 46ef3dcb181d859253f9946a83d2c3df ""
  "C:/Users/chris/AppData/Local/Programs/MiKTeX 2.9/tex/latex/caption/subcaption.sty" 1527494577 4851 d9b86e457cd61d38df0aa3bcf76ebb44 ""
  "C:/Users/chris/AppData/Local/Programs/MiKTeX 2.9/tex/latex/carlisle/remreset.sty" 923785200 1096 6a75275ca00e32428c6f059d2f618ea7 ""
  "C:/Users/chris/AppData/Local/Programs/MiKTeX 2.9/tex/latex/graphics-cfg/color.cfg" 1465894292 1213 620bba36b25224fa9b7e1ccb4ecb76fd ""
  "C:/Users/chris/AppData/Local/Programs/MiKTeX 2.9/tex/latex/graphics-cfg/graphics.cfg" 1465894292 1224 978390e9c2234eab29404bc21b268d1e ""
  "C:/Users/chris/AppData/Local/Programs/MiKTeX 2.9/tex/latex/graphics-def/pdftex.def" 1515451900 17334 520b9b85ad8a2a48eda3f643e27a5179 ""
  "C:/Users/chris/AppData/Local/Programs/MiKTeX 2.9/tex/latex/graphics/color.sty" 1498482885 7229 4ca2945c73eec4e726c0da188fbbf50f ""
  "C:/Users/chris/AppData/Local/Programs/MiKTeX 2.9/tex/latex/graphics/graphics.sty" 1498482885 15796 7d676729b1bedd3e7f3c6717affb366c ""
  "C:/Users/chris/AppData/Local/Programs/MiKTeX 2.9/tex/latex/graphics/graphicx.sty" 1498482885 9342 649f2ccf62888e3d8c3e57256b70b8e1 ""
  "C:/Users/chris/AppData/Local/Programs/MiKTeX 2.9/tex/latex/graphics/keyval.sty" 1498482885 2681 d18d5e19aa8239cf867fa670c556d2e9 ""
  "C:/Users/chris/AppData/Local/Programs/MiKTeX 2.9/tex/latex/graphics/trig.sty" 1498482885 4097 0a268fbfda01e381fa95821ab13b6aee ""
  "C:/Users/chris/AppData/Local/Programs/MiKTeX 2.9/tex/latex/oberdiek/aliascnt.sty" 1516841691 2511 9250ac9a7cafca5bf9264add9b635239 ""
  "C:/Users/chris/AppData/Local/Programs/MiKTeX 2.9/tex/latex/oberdiek/epstopdf-base.sty" 1516841693 12095 5337833c991d80788a43d3ce26bd1c46 ""
  "C:/Users/chris/AppData/Local/Programs/MiKTeX 2.9/tex/latex/oberdiek/grfext.sty" 1516841693 7075 2fe3d848bba95f139de11ded085e74aa ""
  "C:/Users/chris/AppData/Local/Programs/MiKTeX 2.9/tex/latex/oberdiek/kvoptions.sty" 1516841695 22417 1d9df1eb66848aa31b18a593099cf45c ""
  "C:/Users/chris/AppData/Local/Programs/MiKTeX 2.9/tex/latex/tools/array.sty" 1492423193 12755 d41f82b039f900e95f351e54ae740f31 ""
  "C:/Users/chris/AppData/Local/Programs/MiKTeX 2.9/tex/latex/tools/multicol.sty" 1492423194 31235 4d723b83c66873ba53f72c4a8730d6d3 ""
  "C:/Users/chris/AppData/Local/Programs/MiKTeX 2.9/tex/latex/tools/tabularx.sty" 1492423193 7370 64e8a94c3d083215654cd9a5b9dcc136 ""
  "C:/Users/chris/AppData/Local/Programs/MiKTeX 2.9/tex/latex/url/url.sty" 1388494052 12796 8edb7d69a20b857904dd0ea757c14ec9 ""
  "CDAN_plot_angle.pdf" 1601304962 16377 80c0ebdcc7e152e55878541d48a57f74 ""
  "DANN_plot_angle.pdf" 1601304962 16363 e30d6149f07f59c0af3dff78ffc0f27d ""
  "c:/Users/chris/Documents/Paper/Accepted/2020_ACCV_ASAN/0543-supp/543-supp.aux" 1601538240 8670 a14258221b64742a2efbd5d23bd0d5ec ""
  "c:/Users/chris/Documents/Paper/Accepted/2020_ACCV_ASAN/0543-supp/543-supp.tex" 1601538265 37473 cc98f96bcdf8ace3764f1f526203a066 ""
  "dataset/Office-31/amazon/back_back/frame_0001.jpg" 1601304962 8788 d8c97caf7f5556979234b6318230930f ""
  "dataset/Office-31/amazon/back_back/frame_0002.jpg" 1601304962 10296 1e5d2e9fe24af215443e16e7106a02a4 ""
  "dataset/Office-31/amazon/back_back/frame_0003.jpg" 1601304962 11828 4cb93b1051e1d446c5e14f33a3ef9b91 ""
  "dataset/Office-31/amazon/bike/frame_0001.jpg" 1601304962 10557 82ca5ab63707079653adcbec7ac81cf5 ""
  "dataset/Office-31/amazon/bike/frame_0002.jpg" 1601304962 12074 6800b428c404a5aec632fc03cf7d4552 ""
  "dataset/Office-31/amazon/bike/frame_0003.jpg" 1601304962 11103 e7f25d57d0c5672cdb83d445f01ba225 ""
  "dataset/Office-31/amazon/desk_lamp/frame_0001.jpg" 1601304962 5026 8c7dbc9dfd188462aaa6e293f8674c6b ""
  "dataset/Office-31/amazon/desk_lamp/frame_0002.jpg" 1601304962 6331 0da6f1f67b4b92dd786225ae9151e90c ""
  "dataset/Office-31/dslr/back_pack/frame_0001.jpg" 1601304962 140407 6533c570cccb6f2d6d7df454a21b6723 ""
  "dataset/Office-31/dslr/back_pack/frame_0008.jpg" 1601304962 149114 989e672aa0c6d23a3cfeb9659a0e9ce9 ""
  "dataset/Office-31/dslr/back_pack/frame_0012.jpg" 1601304962 149366 92a95260bccd3f27b74dd6e140ba0de3 ""
  "dataset/Office-31/dslr/bike/frame_0001.jpg" 1601304962 141100 aa6a9ba00e3c7a627c1b7b4db469a4fc ""
  "dataset/Office-31/dslr/bike/frame_0008.jpg" 1601304962 135747 5f53286f8e48de43a3ec45d7651d98a6 ""
  "dataset/Office-31/dslr/bike/frame_0009.jpg" 1601304962 144498 d11a137713819525189c32f055422049 ""
  "dataset/Office-31/dslr/desk_lamp/frame_0004.jpg" 1601304962 59635 804cdb21bc26c163bcc4a94203038da3 ""
  "dataset/Office-31/dslr/desk_lamp/frame_0006.jpg" 1601304962 57156 59c7503a91b31bbb1dfb281c0b246b5f ""
  "dataset/Office-31/dslr/desk_lamp/frame_0010.jpg" 1601304962 62985 57962923493d08a0254c8e007bb7b892 ""
  "dataset/Office-31/webcam/back_pack/frame_0007.jpg" 1601304962 26144 2de7c281d7f140fc9b1382c4c637ea66 ""
  "dataset/Office-31/webcam/back_pack/frame_0018.jpg" 1601304962 34375 ad5996c0fd77b47458c28a4ce88e6b7d ""
  "dataset/Office-31/webcam/back_pack/frame_0026.jpg" 1601304962 42098 68fab97aba7dbf6a28a448e39ef08c88 ""
  "dataset/Office-31/webcam/bike/frame_0002.jpg" 1601304962 45757 0effaad0bbd1ef67516b3f0d58f1d777 ""
  "dataset/Office-31/webcam/bike/frame_0003.jpg" 1601304962 39688 6012730c572a97f9f8c1b6af29967d68 ""
  "dataset/Office-31/webcam/bike/frame_0010.jpg" 1601304962 44574 270fe0a4b0b1ff9769f7c744aacf1669 ""
  "dataset/Office-31/webcam/desk_lamp/frame_0006.jpg" 1601304962 29096 6d04b065704a30ac1cd37d7e056b8d8c ""
  "dataset/Office-31/webcam/desk_lamp/frame_0008.jpg" 1601304962 33411 aca5a0b42502930dbdb82e0b8ef99e67 ""
  "dataset/Office-31/webcam/desk_lamp/frame_0012.jpg" 1601304962 31594 20eaaf0b1370c8c892c3f56fe20d72cd ""
  "dataset/Office-Home/Art/calculator/00001.jpg" 1601304962 124663 a85014395a4e89e9772ea3f3fe71ac63 ""
  "dataset/Office-Home/Art/calculator/00004.jpg" 1601304962 64261 b337c596d6e586a863a55d4fcb4613ff ""
  "dataset/Office-Home/Art/calculator/00006.jpg" 1601304962 51806 ee2b317be430982c04225d139626c3da ""
  "dataset/Office-Home/Art/candles/00064.jpg" 1601304962 131184 57010f27c52478f82a8229067494ba07 ""
  "dataset/Office-Home/Art/candles/00065.jpg" 1601304962 20768 a1d2c7720db42999c5d104a5f3a9aa0e ""
  "dataset/Office-Home/Art/candles/00068.jpg" 1601304962 369654 bf5b45f8c33f96744dbc172e8d6ec612 ""
  "dataset/Office-Home/Art/helmet/00053.jpg" 1601304962 134858 20d01848d77f1f10bc602578271a357e ""
  "dataset/Office-Home/Art/helmet/00073.jpg" 1601304962 106695 f86621397cd7b53ee4d79145e20ff619 ""
  "dataset/Office-Home/Art/helmet/00079.jpg" 1601304962 152092 67ecfb040ae7279e8c8426fbdfc89f4b ""
  "dataset/Office-Home/Product/calculator/00013.jpg" 1601304962 44464 1e7d1fc27f90675e52289ce0ef9549ee ""
  "dataset/Office-Home/Product/calculator/00022.jpg" 1601304964 27835 5dcec604e0d9071be1cfe7dd2f3162bc ""
  "dataset/Office-Home/Product/calculator/00041.jpg" 1601304964 23308 246c093d577e24f3ace93f7b9894927f ""
  "dataset/Office-Home/Product/candles/00001.jpg" 1601304964 21858 147fa87767bd8eec454a4d34963743be ""
  "dataset/Office-Home/Product/candles/00002.jpg" 1601304964 33146 c99acf354b63afd7e3cb3a22a23fe862 ""
  "dataset/Office-Home/Product/candles/00053.jpg" 1601304964 18959 f5eb767dbbfe400615a83e2760ff4ef0 ""
  "dataset/Office-Home/Product/helmet/00001.jpg" 1601304964 33232 886ee5cfa846bc3a8ea26a9c178e6579 ""
  "dataset/Office-Home/Product/helmet/00002.jpg" 1601304964 16355 5959e218419732851531ac337f85b680 ""
  "dataset/Office-Home/Product/helmet/00035.jpg" 1601304964 23405 179a6fafda66b93dae34293a332fbc38 ""
  "dataset/Office-Home/Real_World/calculator/00001.jpg" 1601304964 3496 94997ff3f98f211f8b833e6f293054fa ""
  "dataset/Office-Home/Real_World/calculator/00002.jpg" 1601304964 17166 9a1e1ef71d0dd86dfc4b6ed0f5ecf18b ""
  "dataset/Office-Home/Real_World/calculator/00003.jpg" 1601304964 238642 989f9c9a7cf18b4d8a1409e007083703 ""
  "dataset/Office-Home/Real_World/candles/00068.jpg" 1601304964 434902 c645b599335dc19483f35b970a9ac96d ""
  "dataset/Office-Home/Real_World/candles/00074.jpg" 1601304964 197744 3e6a985e9e66425b2cb4355108bf5253 ""
  "dataset/Office-Home/Real_World/candles/00097.jpg" 1601304964 231730 29982024ca56d73d4a0888890f845ac1 ""
  "dataset/Office-Home/Real_World/helmet/00010.jpg" 1601304964 51844 d99f77c957b6913191a6743c96a765c0 ""
  "dataset/Office-Home/Real_World/helmet/00025.jpg" 1601304964 187637 52a8089d01d1d253787fa7cb0dba8080 ""
  "dataset/Office-Home/Real_World/helmet/00033.jpg" 1601304964 60855 ec57566bd00c4c417e37064f3161023d ""
  "dataset/imageClef/c/0/251_0023.jpg" 1601304964 9866 b8ec3996b2b57a33d787a59799375633 ""
  "dataset/imageClef/c/0/251_0090.jpg" 1601304964 11816 99fc841f1a17ce61b9f25a48d094e9a9 ""
  "dataset/imageClef/c/0/251_0115.jpg" 1601304964 15736 fdef0666749c6a4264ac2434657aea4f ""
  "dataset/imageClef/c/1/224_0007.jpg" 1601304964 25973 85a9955b06fc4b3a2e1628187205c131 ""
  "dataset/imageClef/c/1/224_0044.jpg" 1601304964 21972 0e1b0844b5e22d31dc6d9b2bb5f307e0 ""
  "dataset/imageClef/c/1/224_0067.jpg" 1601304964 26550 19cc27ba1a556c2411a6b7e6e9a265a2 ""
  "dataset/imageClef/c/2/113_0022.jpg" 1601304964 36040 9a594d9ac91789e5546f8cf0b7502964 ""
  "dataset/imageClef/c/2/113_0115.jpg" 1601304964 18705 467931d6de43ccfd1d2a8d8d3394def1 ""
  "dataset/imageClef/c/2/113_0116.jpg" 1601304964 12660 26cf8b8d1699f97572121fb944261249 ""
  "dataset/imageClef/i/0/n02691156_11729.JPEG" 1601304964 101663 a189a9e84f657cbccec64bcd2d1d560f ""
  "dataset/imageClef/i/0/n02691156_1806.JPEG" 1601304964 31373 27d3ea9d5a0975ba2997b9e1819ac9f4 ""
  "dataset/imageClef/i/0/n02691156_49198.JPEG" 1601304964 143855 601293b27c225974a6a526e1244f6687 ""
  "dataset/imageClef/i/1/n02834778_2737.JPEG" 1601304964 118886 a07fbc4ba32f50693b3354b6f81406c6 ""
  "dataset/imageClef/i/1/n02834778_763.JPEG" 1601304964 108432 0aeb8c62ea6144ef80ad146859abd74a ""
  "dataset/imageClef/i/1/n02834778_8949.JPEG" 1601304964 123015 af9bd3c65c804d054d09c7b49833670c ""
  "dataset/imageClef/i/2/n01503061_12696.JPEG" 1601304964 118752 837cf1e7f67829284ace8547f8d03288 ""
  "dataset/imageClef/i/2/n01503061_14761.JPEG" 1601304964 141993 7529a23efee33f13976666a2cd477090 ""
  "dataset/imageClef/i/2/n01503061_3094.JPEG" 1601304964 93164 83fb00a3afa45effd82b0f291c781c86 ""
  "dataset/imageClef/p/0/2008_005905.jpg" 1601304964 7773 9deec5b935d1113e5b602b12a006d195 ""
  "dataset/imageClef/p/0/2011_002751.jpg" 1601304964 19352 bdc0ee15f0d99e9a84e4943b454d8ff4 ""
  "dataset/imageClef/p/0/2011_002993.jpg" 1601304964 7213 bceb0899182d8c06e8a63e1a1ff5cf0c ""
  "dataset/imageClef/p/1/2008_005175.jpg" 1601304964 31250 816488a6d2dfd8f97eaf9fa253d50ee7 ""
  "dataset/imageClef/p/1/2008_007510.jpg" 1601304964 21737 7344feebdb66a39778e752d8deb242fd ""
  "dataset/imageClef/p/1/2011_000087.jpg" 1601304964 19501 984a20afad740156f51f1b3443a0a4e1 ""
  "dataset/imageClef/p/2/2008_007003.jpg" 1601304964 11527 2d68bbd32fdb77d0bdb3e07d58cd44f4 ""
  "dataset/imageClef/p/2/2008_007486.jpg" 1601304964 28169 f01e6f50f38f1bc0d59b51763bc8bb6e ""
  "dataset/imageClef/p/2/2009_003285.jpg" 1601304964 18011 17a1cfe411f98a3f978c0ad81122d224 ""
  "dataset/visda/real/aeroplane/aeroplane_156302.jpg" 1601304964 6805 cb9f8800b35e027562b976a302b0c270 ""
  "dataset/visda/real/aeroplane/aeroplane_156317.jpg" 1601304964 4642 e7546b768e6afbd764612394422b900a ""
  "dataset/visda/real/aeroplane/aeroplane_156332.jpg" 1601304964 9012 f19069b2b58a5cfdbd10d0db25f464ca ""
  "dataset/visda/real/car/car_131741.jpg" 1601304964 8255 f6cac5c1e6a8e55a980350ad2a57ea1e ""
  "dataset/visda/real/car/car_131760.jpg" 1601304964 7223 bb709499dfd3e09e64bf2f4e3083a3e4 ""
  "dataset/visda/real/car/car_131776.jpg" 1601304964 10963 7b825ec8b397fb6512b64d5966b853f9 ""
  "dataset/visda/real/horse/horse_53418.jpg" 1601304964 13747 f64197fc463f2523c0224fa43fe82d76 ""
  "dataset/visda/real/horse/horse_53430.jpg" 1601304964 12744 74060f2f129b6f9d09d18d81e360ed76 ""
  "dataset/visda/real/horse/horse_53455.jpg" 1601304964 14434 eae8d21e0fe01c8917b088d10339e944 ""
  "dataset/visda/synthetic/aeroplane/src_1_02691156_1b0b1d2cb9f9d5c0575bd26acccafabd__10_236_150.png" 1601304964 3121 22dce9298ceae399da8749f558469591 ""
  "dataset/visda/synthetic/aeroplane/src_1_02691156_1b0b1d2cb9f9d5c0575bd26acccafabd__44_236_150.png" 1601304964 3463 dbe87ee0346059f30f7e55effae39637 ""
  "dataset/visda/synthetic/aeroplane/src_1_02691156_1b0b1d2cb9f9d5c0575bd26acccafabd__78_349_150.png" 1601304964 3412 cf824bc81eaced63d89fd5bee2bca0f1 ""
  "dataset/visda/synthetic/car/src_1_02958343_1abeca7159db7ed9f200a72c9245aee7__10_349_150.png" 1601304964 3909 bc783cee1444035455d13965b92e6aca ""
  "dataset/visda/synthetic/car/src_1_02958343_1abeca7159db7ed9f200a72c9245aee7__44_10_150.png" 1601304964 4961 0071620dc329e48d1ee1e0cd8e93ced0 ""
  "dataset/visda/synthetic/car/src_1_02958343_1abeca7159db7ed9f200a72c9245aee7__61_123_165.png" 1601304964 4971 6c866962c44dd058d1346525af04c519 ""
  "dataset/visda/synthetic/horse/src_3_1511__27_123_165.png" 1601304964 3406 3d608bfe0b23aa4b8059b3efa014cd35 ""
  "dataset/visda/synthetic/horse/src_3_1511__44_236_150.png" 1601304964 3959 69fb34232f8006eb139e9af4ef02657a ""
  "dataset/visda/synthetic/horse/src_3_1511__78_236_150.png" 1601304964 4094 4d5f45fb001cd53e445b5d5f35ed3ae6 ""
  "llncs.cls" 1601304962 42249 b08ec23e994470d7d8fc268d245cf555 ""
  "plot_hyperparmeter.pdf" 1601304962 17910 3ad9d01453ccb0631be6b7d66ee9f17e ""
  "plot_target_acc.pdf" 1601304962 16151 f18bbe82984d62364802a8d3b413f4d7 ""
  "plot_train_test.pdf" 1601304962 15037 92ad5972fa8046f64edd24bc0d8461e1 ""
  "plot_transfer_ic.pdf" 1601304962 18325 1783d82750eef604695a28bed8702c3e ""
  "tsne_ASAN_classification_.pdf" 1601304962 23454 6aeb0d28a2574f204207708a850bbf51 ""
  "tsne_ASAN_features_domain_.pdf" 1601304962 20718 f507f74676c1903110f901cdfc8a7af7 ""
  "tsne_CDAN_classification_.pdf" 1601304962 23476 487eec153b1d69dcb7a6ac0a8f95e7f6 ""
  "tsne_CDAN_features_domain_.pdf" 1601304962 20731 36a0e589f93aeb1f3526c577e1d01b18 ""
  "tsne_DANN_classification_.pdf" 1601304962 23566 981e7ab69c608c7b2cfe492336a77214 ""
  "tsne_DANN_features_domain_.pdf" 1601304962 20773 ad8e8d4eeaf458a2141fb0654e7f1866 ""
  (generated)
  "c:/Users/chris/Documents/Paper/Accepted/2020_ACCV_ASAN/0543-supp/543-supp.pdf"
  "c:/Users/chris/Documents/Paper/Accepted/2020_ACCV_ASAN/0543-supp/543-supp.log"
  "543-supp.log"
  "543-supp.pdf"
  "543-supp.aux"
