# Supplementary material
Source: ML conference proceedings conference paper supplement (https://openaccess.thecvf.com/content/ACCV2020/html/Raab_Bridging_Adversarial_and_ACCV_2020_paper.html)
Supplement: Supplementary file 10 [file Raab_Bridging_Adversarial_and_ACCV_2020_supplemental.zip › 543-supp.fls]

PWD c:/Users/chris/Documents/Paper/Accepted/2020_ACCV_ASAN/0543-supp
INPUT C:/Users/chris/AppData/Local/MiKTeX/2.9/miktex/data/le/pdftex/pdflatex.fmt
INPUT c:/Users/chris/Documents/Paper/Accepted/2020_ACCV_ASAN/0543-supp/543-supp.tex
OUTPUT c:/Users/chris/Documents/Paper/Accepted/2020_ACCV_ASAN/0543-supp/543-supp.log
INPUT c:/Users/chris/Documents/Paper/Accepted/2020_ACCV_ASAN/0543-supp/llncs.cls
INPUT c:/Users/chris/Documents/Paper/Accepted/2020_ACCV_ASAN/0543-supp/llncs.cls
INPUT C:/Users/chris/AppData/Local/Programs/MiKTeX 2.9/tex/latex/base/article.cls
INPUT C:/Users/chris/AppData/Local/Programs/MiKTeX 2.9/tex/latex/base/article.cls
INPUT C:/Users/chris/AppData/Local/Programs/MiKTeX 2.9/tex/latex/base/size10.clo
INPUT C:/Users/chris/AppData/Local/Programs/MiKTeX 2.9/tex/latex/base/size10.clo
INPUT C:/Users/chris/AppData/Local/Programs/MiKTeX 2.9/tex/latex/tools/multicol.sty
INPUT C:/Users/chris/AppData/Local/Programs/MiKTeX 2.9/tex/latex/tools/multicol.sty
INPUT C:/Users/chris/AppData/Local/Programs/MiKTeX 2.9/tex/latex/oberdiek/aliascnt.sty
INPUT C:/Users/chris/AppData/Local/Programs/MiKTeX 2.9/tex/latex/oberdiek/aliascnt.sty
INPUT C:/Users/chris/AppData/Local/Programs/MiKTeX 2.9/tex/latex/carlisle/remreset.sty
INPUT C:/Users/chris/AppData/Local/Programs/MiKTeX 2.9/tex/latex/carlisle/remreset.sty
INPUT C:/Users/chris/AppData/Local/Programs/MiKTeX 2.9/tex/latex/graphics/graphicx.sty
INPUT C:/Users/chris/AppData/Local/Programs/MiKTeX 2.9/tex/latex/graphics/graphicx.sty
INPUT C:/Users/chris/AppData/Local/Programs/MiKTeX 2.9/tex/latex/graphics/keyval.sty
INPUT C:/Users/chris/AppData/Local/Programs/MiKTeX 2.9/tex/latex/graphics/keyval.sty
INPUT C:/Users/chris/AppData/Local/Programs/MiKTeX 2.9/tex/latex/graphics/graphics.sty
INPUT C:/Users/chris/AppData/Local/Programs/MiKTeX 2.9/tex/latex/graphics/graphics.sty
INPUT C:/Users/chris/AppData/Local/Programs/MiKTeX 2.9/tex/latex/graphics/trig.sty
INPUT C:/Users/chris/AppData/Local/Programs/MiKTeX 2.9/tex/latex/graphics/trig.sty
INPUT C:/Users/chris/AppData/Local/Programs/MiKTeX 2.9/tex/latex/graphics-cfg/graphics.cfg
INPUT C:/Users/chris/AppData/Local/Programs/MiKTeX 2.9/tex/latex/graphics-cfg/graphics.cfg
INPUT C:/Users/chris/AppData/Local/Programs/MiKTeX 2.9/tex/latex/graphics-def/pdftex.def
INPUT C:/Users/chris/AppData/Local/Programs/MiKTeX 2.9/tex/latex/graphics-def/pdftex.def
INPUT C:/Users/chris/AppData/Local/Programs/MiKTeX 2.9/tex/latex/amsmath/amsmath.sty
INPUT C:/Users/chris/AppData/Local/Programs/MiKTeX 2.9/tex/latex/amsmath/amsmath.sty
INPUT C:/Users/chris/AppData/Local/Programs/MiKTeX 2.9/tex/latex/amsmath/amstext.sty
INPUT C:/Users/chris/AppData/Local/Programs/MiKTeX 2.9/tex/latex/amsmath/amstext.sty
INPUT C:/Users/chris/AppData/Local/Programs/MiKTeX 2.9/tex/latex/amsmath/amsgen.sty
INPUT C:/Users/chris/AppData/Local/Programs/MiKTeX 2.9/tex/latex/amsmath/amsgen.sty
INPUT C:/Users/chris/AppData/Local/Programs/MiKTeX 2.9/tex/latex/amsmath/amsbsy.sty
INPUT C:/Users/chris/AppData/Local/Programs/MiKTeX 2.9/tex/latex/amsmath/amsbsy.sty
INPUT C:/Users/chris/AppData/Local/Programs/MiKTeX 2.9/tex/latex/amsmath/amsopn.sty
INPUT C:/Users/chris/AppData/Local/Programs/MiKTeX 2.9/tex/latex/amsmath/amsopn.sty
INPUT C:/Users/chris/AppData/Local/Programs/MiKTeX 2.9/tex/latex/amsfonts/amssymb.sty
INPUT C:/Users/chris/AppData/Local/Programs/MiKTeX 2.9/tex/latex/amsfonts/amssymb.sty
INPUT C:/Users/chris/AppData/Local/Programs/MiKTeX 2.9/tex/latex/amsfonts/amsfonts.sty
INPUT C:/Users/chris/AppData/Local/Programs/MiKTeX 2.9/tex/latex/amsfonts/amsfonts.sty
INPUT C:/Users/chris/AppData/Local/Programs/MiKTeX 2.9/tex/latex/graphics/color.sty
INPUT C:/Users/chris/AppData/Local/Programs/MiKTeX 2.9/tex/latex/graphics/color.sty
INPUT C:/Users/chris/AppData/Local/Programs/MiKTeX 2.9/tex/latex/graphics-cfg/color.cfg
INPUT C:/Users/chris/AppData/Local/Programs/MiKTeX 2.9/tex/latex/graphics-cfg/color.cfg
INPUT C:/Users/chris/AppData/Local/Programs/MiKTeX 2.9/tex/latex/base/inputenc.sty
INPUT C:/Users/chris/AppData/Local/Programs/MiKTeX 2.9/tex/latex/base/inputenc.sty
INPUT C:/Users/chris/AppData/Local/Programs/MiKTeX 2.9/tex/latex/tools/array.sty
INPUT C:/Users/chris/AppData/Local/Programs/MiKTeX 2.9/tex/latex/tools/array.sty
INPUT C:/Users/chris/AppData/Local/Programs/MiKTeX 2.9/tex/latex/url/url.sty
INPUT C:/Users/chris/AppData/Local/Programs/MiKTeX 2.9/tex/latex/url/url.sty
INPUT C:/Users/chris/AppData/Local/Programs/MiKTeX 2.9/tex/latex/base/textcomp.sty
INPUT C:/Users/chris/AppData/Local/Programs/MiKTeX 2.9/tex/latex/base/textcomp.sty
INPUT C:/Users/chris/AppData/Local/Programs/MiKTeX 2.9/tex/latex/base/ts1enc.def
INPUT C:/Users/chris/AppData/Local/Programs/MiKTeX 2.9/tex/latex/base/ts1enc.def
INPUT C:/Users/chris/AppData/Local/Programs/MiKTeX 2.9/tex/latex/tools/tabularx.sty
INPUT C:/Users/chris/AppData/Local/Programs/MiKTeX 2.9/tex/latex/tools/tabularx.sty
INPUT C:/Users/chris/AppData/Local/Programs/MiKTeX 2.9/tex/latex/caption/subcaption.sty
INPUT C:/Users/chris/AppData/Local/Programs/MiKTeX 2.9/tex/latex/caption/subcaption.sty
INPUT C:/Users/chris/AppData/Local/Programs/MiKTeX 2.9/tex/latex/caption/caption.sty
INPUT C:/Users/chris/AppData/Local/Programs/MiKTeX 2.9/tex/latex/caption/caption.sty
INPUT C:/Users/chris/AppData/Local/Programs/MiKTeX 2.9/tex/latex/caption/caption3.sty
INPUT C:/Users/chris/AppData/Local/Programs/MiKTeX 2.9/tex/latex/caption/caption3.sty
INPUT C:/Users/chris/AppData/Local/Programs/MiKTeX 2.9/tex/generic/genmisc/nth.sty
INPUT C:/Users/chris/AppData/Local/Programs/MiKTeX 2.9/tex/generic/genmisc/nth.sty
INPUT c:/Users/chris/Documents/Paper/Accepted/2020_ACCV_ASAN/0543-supp/543-supp.aux
INPUT c:/Users/chris/Documents/Paper/Accepted/2020_ACCV_ASAN/0543-supp/543-supp.aux
OUTPUT c:/Users/chris/Documents/Paper/Accepted/2020_ACCV_ASAN/0543-supp/543-supp.aux
INPUT C:/Users/chris/AppData/Local/Programs/MiKTeX 2.9/tex/latex/base/ts1cmr.fd
INPUT C:/Users/chris/AppData/Local/Programs/MiKTeX 2.9/tex/latex/base/ts1cmr.fd
INPUT C:/Users/chris/AppData/Local/Programs/MiKTeX 2.9/tex/context/base/supp-pdf.mkii
INPUT C:/Users/chris/AppData/Local/Programs/MiKTeX 2.9/tex/context/base/supp-pdf.mkii
INPUT C:/Users/chris/AppData/Local/Programs/MiKTeX 2.9/tex/latex/oberdiek/epstopdf-base.sty
INPUT C:/Users/chris/AppData/Local/Programs/MiKTeX 2.9/tex/latex/oberdiek/epstopdf-base.sty
INPUT C:/Users/chris/AppData/Local/Programs/MiKTeX 2.9/tex/generic/oberdiek/infwarerr.sty
INPUT C:/Users/chris/AppData/Local/Programs/MiKTeX 2.9/tex/generic/oberdiek/infwarerr.sty
INPUT C:/Users/chris/AppData/Local/Programs/MiKTeX 2.9/tex/latex/oberdiek/grfext.sty
INPUT C:/Users/chris/AppData/Local/Programs/MiKTeX 2.9/tex/latex/oberdiek/grfext.sty
INPUT C:/Users/chris/AppData/Local/Programs/MiKTeX 2.9/tex/generic/oberdiek/kvdefinekeys.sty
INPUT C:/Users/chris/AppData/Local/Programs/MiKTeX 2.9/tex/generic/oberdiek/kvdefinekeys.sty
INPUT C:/Users/chris/AppData/Local/Programs/MiKTeX 2.9/tex/generic/oberdiek/ltxcmds.sty
INPUT C:/Users/chris/AppData/Local/Programs/MiKTeX 2.9/tex/generic/oberdiek/ltxcmds.sty
INPUT C:/Users/chris/AppData/Local/Programs/MiKTeX 2.9/tex/latex/oberdiek/kvoptions.sty
INPUT C:/Users/chris/AppData/Local/Programs/MiKTeX 2.9/tex/latex/oberdiek/kvoptions.sty
INPUT C:/Users/chris/AppData/Local/Programs/MiKTeX 2.9/tex/generic/oberdiek/kvsetkeys.sty
INPUT C:/Users/chris/AppData/Local/Programs/MiKTeX 2.9/tex/generic/oberdiek/kvsetkeys.sty
INPUT C:/Users/chris/AppData/Local/Programs/MiKTeX 2.9/tex/generic/oberdiek/etexcmds.sty
INPUT C:/Users/chris/AppData/Local/Programs/MiKTeX 2.9/tex/generic/oberdiek/etexcmds.sty
INPUT C:/Users/chris/AppData/Local/Programs/MiKTeX 2.9/tex/generic/oberdiek/ifluatex.sty
INPUT C:/Users/chris/AppData/Local/Programs/MiKTeX 2.9/tex/generic/oberdiek/ifluatex.sty
INPUT C:/Users/chris/AppData/Local/Programs/MiKTeX 2.9/tex/generic/oberdiek/pdftexcmds.sty
INPUT C:/Users/chris/AppData/Local/Programs/MiKTeX 2.9/tex/generic/oberdiek/pdftexcmds.sty
INPUT C:/Users/chris/AppData/Local/Programs/MiKTeX 2.9/tex/generic/oberdiek/ifpdf.sty
INPUT C:/Users/chris/AppData/Local/Programs/MiKTeX 2.9/tex/generic/oberdiek/ifpdf.sty
INPUT C:/Users/chris/AppData/Local/Programs/MiKTeX 2.9/fonts/tfm/public/cm/cmr12.tfm
INPUT C:/Users/chris/AppData/Local/Programs/MiKTeX 2.9/fonts/tfm/public/cm/cmbx12.tfm
INPUT C:/Users/chris/AppData/Local/Programs/MiKTeX 2.9/fonts/tfm/public/amsfonts/cmextra/cmex7.tfm
INPUT C:/Users/chris/AppData/Local/Programs/MiKTeX 2.9/fonts/tfm/public/amsfonts/cmextra/cmex7.tfm
INPUT C:/Users/chris/AppData/Local/Programs/MiKTeX 2.9/tex/latex/amsfonts/umsa.fd
INPUT C:/Users/chris/AppData/Local/Programs/MiKTeX 2.9/tex/latex/amsfonts/umsa.fd
INPUT C:/Users/chris/AppData/Local/Programs/MiKTeX 2.9/fonts/tfm/public/amsfonts/symbols/msam10.tfm
INPUT C:/Users/chris/AppData/Local/Programs/MiKTeX 2.9/fonts/tfm/public/amsfonts/symbols/msam7.tfm
INPUT C:/Users/chris/AppData/Local/Programs/MiKTeX 2.9/fonts/tfm/public/amsfonts/symbols/msam5.tfm
INPUT C:/Users/chris/AppData/Local/Programs/MiKTeX 2.9/tex/latex/amsfonts/umsb.fd
INPUT C:/Users/chris/AppData/Local/Programs/MiKTeX 2.9/tex/latex/amsfonts/umsb.fd
INPUT C:/Users/chris/AppData/Local/Programs/MiKTeX 2.9/fonts/tfm/public/amsfonts/symbols/msbm10.tfm
INPUT C:/Users/chris/AppData/Local/Programs/MiKTeX 2.9/fonts/tfm/public/amsfonts/symbols/msbm7.tfm
INPUT C:/Users/chris/AppData/Local/Programs/MiKTeX 2.9/fonts/tfm/public/amsfonts/symbols/msbm5.tfm
INPUT C:/Users/chris/AppData/Local/Programs/MiKTeX 2.9/fonts/tfm/public/cm/cmr9.tfm
INPUT C:/Users/chris/AppData/Local/Programs/MiKTeX 2.9/fonts/tfm/public/cm/cmtt9.tfm
INPUT C:/Users/chris/AppData/Local/Programs/MiKTeX 2.9/fonts/tfm/public/cm/cmsy9.tfm
INPUT C:/Users/chris/AppData/Local/Programs/MiKTeX 2.9/fonts/tfm/public/cm/cmr12.tfm
INPUT C:/Users/chris/AppData/Local/Programs/MiKTeX 2.9/fonts/tfm/public/cm/cmbx12.tfm
INPUT C:/Users/chris/AppData/Local/Programs/MiKTeX 2.9/fonts/tfm/public/cm/cmti10.tfm
INPUT C:/Users/chris/AppData/Local/Programs/MiKTeX 2.9/fonts/tfm/public/cm/cmbx10.tfm
INPUT C:/Users/chris/AppData/Local/Programs/MiKTeX 2.9/fonts/tfm/public/cm/cmbx7.tfm
INPUT C:/Users/chris/AppData/Local/Programs/MiKTeX 2.9/fonts/tfm/public/cm/cmbx5.tfm
INPUT c:/Users/chris/Documents/Paper/Accepted/2020_ACCV_ASAN/0543-supp/DANN_plot_angle.pdf
INPUT c:/Users/chris/Documents/Paper/Accepted/2020_ACCV_ASAN/0543-supp/DANN_plot_angle.pdf
OUTPUT c:/Users/chris/Documents/Paper/Accepted/2020_ACCV_ASAN/0543-supp/543-supp.pdf
INPUT c:/Users/chris/Documents/Paper/Accepted/2020_ACCV_ASAN/0543-supp/DANN_plot_angle.pdf
INPUT c:/Users/chris/Documents/Paper/Accepted/2020_ACCV_ASAN/0543-supp/DANN_plot_angle.pdf
INPUT c:/Users/chris/Documents/Paper/Accepted/2020_ACCV_ASAN/0543-supp/CDAN_plot_angle.pdf
INPUT c:/Users/chris/Documents/Paper/Accepted/2020_ACCV_ASAN/0543-supp/CDAN_plot_angle.pdf
INPUT c:/Users/chris/Documents/Paper/Accepted/2020_ACCV_ASAN/0543-supp/CDAN_plot_angle.pdf
INPUT c:/Users/chris/Documents/Paper/Accepted/2020_ACCV_ASAN/0543-supp/CDAN_plot_angle.pdf
INPUT c:/Users/chris/Documents/Paper/Accepted/2020_ACCV_ASAN/0543-supp/ASAN_plot_angle.pdf
INPUT c:/Users/chris/Documents/Paper/Accepted/2020_ACCV_ASAN/0543-supp/ASAN_plot_angle.pdf
INPUT c:/Users/chris/Documents/Paper/Accepted/2020_ACCV_ASAN/0543-supp/ASAN_plot_angle.pdf
INPUT c:/Users/chris/Documents/Paper/Accepted/2020_ACCV_ASAN/0543-supp/ASAN_plot_angle.pdf
INPUT C:/Users/chris/AppData/Local/MiKTeX/2.9/pdftex/config/pdftex.map
INPUT C:/Users/chris/AppData/Local/Programs/MiKTeX 2.9/fonts/tfm/public/cm/cmr6.tfm
INPUT C:/Users/chris/AppData/Local/Programs/MiKTeX 2.9/fonts/tfm/public/cm/cmmi9.tfm
INPUT C:/Users/chris/AppData/Local/Programs/MiKTeX 2.9/fonts/tfm/public/cm/cmmi6.tfm
INPUT C:/Users/chris/AppData/Local/Programs/MiKTeX 2.9/fonts/tfm/public/cm/cmsy6.tfm
INPUT C:/Users/chris/AppData/Local/Programs/MiKTeX 2.9/fonts/tfm/public/amsfonts/cmextra/cmex9.tfm
INPUT C:/Users/chris/AppData/Local/Programs/MiKTeX 2.9/fonts/tfm/public/amsfonts/cmextra/cmex7.tfm
INPUT C:/Users/chris/AppData/Local/Programs/MiKTeX 2.9/fonts/tfm/public/cm/cmbx9.tfm
INPUT C:/Users/chris/AppData/Local/Programs/MiKTeX 2.9/fonts/tfm/public/cm/cmbx6.tfm
INPUT C:/Users/chris/AppData/Local/Programs/MiKTeX 2.9/fonts/tfm/public/amsfonts/symbols/msam10.tfm
INPUT C:/Users/chris/AppData/Local/Programs/MiKTeX 2.9/fonts/tfm/public/amsfonts/symbols/msam7.tfm
INPUT C:/Users/chris/AppData/Local/Programs/MiKTeX 2.9/fonts/tfm/public/amsfonts/symbols/msbm10.tfm
INPUT C:/Users/chris/AppData/Local/Programs/MiKTeX 2.9/fonts/tfm/public/amsfonts/symbols/msbm7.tfm
INPUT c:/Users/chris/Documents/Paper/Accepted/2020_ACCV_ASAN/0543-supp/plot_hyperparmeter.pdf
INPUT c:/Users/chris/Documents/Paper/Accepted/2020_ACCV_ASAN/0543-supp/plot_hyperparmeter.pdf
INPUT c:/Users/chris/Documents/Paper/Accepted/2020_ACCV_ASAN/0543-supp/plot_hyperparmeter.pdf
INPUT c:/Users/chris/Documents/Paper/Accepted/2020_ACCV_ASAN/0543-supp/plot_hyperparmeter.pdf
INPUT c:/Users/chris/Documents/Paper/Accepted/2020_ACCV_ASAN/0543-supp/plot_transfer_ic.pdf
INPUT c:/Users/chris/Documents/Paper/Accepted/2020_ACCV_ASAN/0543-supp/plot_transfer_ic.pdf
INPUT c:/Users/chris/Documents/Paper/Accepted/2020_ACCV_ASAN/0543-supp/plot_transfer_ic.pdf
INPUT c:/Users/chris/Documents/Paper/Accepted/2020_ACCV_ASAN/0543-supp/plot_transfer_ic.pdf
INPUT c:/Users/chris/Documents/Paper/Accepted/2020_ACCV_ASAN/0543-supp/plot_target_acc.pdf
INPUT c:/Users/chris/Documents/Paper/Accepted/2020_ACCV_ASAN/0543-supp/plot_target_acc.pdf
INPUT c:/Users/chris/Documents/Paper/Accepted/2020_ACCV_ASAN/0543-supp/plot_target_acc.pdf
INPUT c:/Users/chris/Documents/Paper/Accepted/2020_ACCV_ASAN/0543-supp/plot_target_acc.pdf
INPUT c:/Users/chris/Documents/Paper/Accepted/2020_ACCV_ASAN/0543-supp/plot_train_test.pdf
INPUT c:/Users/chris/Documents/Paper/Accepted/2020_ACCV_ASAN/0543-supp/plot_train_test.pdf
INPUT c:/Users/chris/Documents/Paper/Accepted/2020_ACCV_ASAN/0543-supp/plot_train_test.pdf
INPUT c:/Users/chris/Documents/Paper/Accepted/2020_ACCV_ASAN/0543-supp/plot_train_test.pdf
INPUT c:/Users/chris/Documents/Paper/Accepted/2020_ACCV_ASAN/0543-supp/tsne_DANN_features_domain_.pdf
INPUT c:/Users/chris/Documents/Paper/Accepted/2020_ACCV_ASAN/0543-supp/tsne_DANN_features_domain_.pdf
INPUT c:/Users/chris/Documents/Paper/Accepted/2020_ACCV_ASAN/0543-supp/tsne_DANN_features_domain_.pdf
INPUT c:/Users/chris/Documents/Paper/Accepted/2020_ACCV_ASAN/0543-supp/tsne_DANN_features_domain_.pdf
INPUT c:/Users/chris/Documents/Paper/Accepted/2020_ACCV_ASAN/0543-supp/tsne_CDAN_features_domain_.pdf
INPUT c:/Users/chris/Documents/Paper/Accepted/2020_ACCV_ASAN/0543-supp/tsne_CDAN_features_domain_.pdf
INPUT c:/Users/chris/Documents/Paper/Accepted/2020_ACCV_ASAN/0543-supp/tsne_CDAN_features_domain_.pdf
INPUT c:/Users/chris/Documents/Paper/Accepted/2020_ACCV_ASAN/0543-supp/tsne_CDAN_features_domain_.pdf
INPUT c:/Users/chris/Documents/Paper/Accepted/2020_ACCV_ASAN/0543-supp/tsne_ASAN_features_domain_.pdf
INPUT c:/Users/chris/Documents/Paper/Accepted/2020_ACCV_ASAN/0543-supp/tsne_ASAN_features_domain_.pdf
INPUT c:/Users/chris/Documents/Paper/Accepted/2020_ACCV_ASAN/0543-supp/tsne_ASAN_features_domain_.pdf
INPUT c:/Users/chris/Documents/Paper/Accepted/2020_ACCV_ASAN/0543-supp/tsne_ASAN_features_domain_.pdf
INPUT c:/Users/chris/Documents/Paper/Accepted/2020_ACCV_ASAN/0543-supp/tsne_DANN_classification_.pdf
INPUT c:/Users/chris/Documents/Paper/Accepted/2020_ACCV_ASAN/0543-supp/tsne_DANN_classification_.pdf
INPUT c:/Users/chris/Documents/Paper/Accepted/2020_ACCV_ASAN/0543-supp/tsne_DANN_classification_.pdf
INPUT c:/Users/chris/Documents/Paper/Accepted/2020_ACCV_ASAN/0543-supp/tsne_DANN_classification_.pdf
INPUT c:/Users/chris/Documents/Paper/Accepted/2020_ACCV_ASAN/0543-supp/tsne_CDAN_classification_.pdf
INPUT c:/Users/chris/Documents/Paper/Accepted/2020_ACCV_ASAN/0543-supp/tsne_CDAN_classification_.pdf
INPUT c:/Users/chris/Documents/Paper/Accepted/2020_ACCV_ASAN/0543-supp/tsne_CDAN_classification_.pdf
INPUT c:/Users/chris/Documents/Paper/Accepted/2020_ACCV_ASAN/0543-supp/tsne_CDAN_classification_.pdf
INPUT c:/Users/chris/Documents/Paper/Accepted/2020_ACCV_ASAN/0543-supp/tsne_ASAN_classification_.pdf
INPUT c:/Users/chris/Documents/Paper/Accepted/2020_ACCV_ASAN/0543-supp/tsne_ASAN_classification_.pdf
INPUT c:/Users/chris/Documents/Paper/Accepted/2020_ACCV_ASAN/0543-supp/tsne_ASAN_classification_.pdf
INPUT c:/Users/chris/Documents/Paper/Accepted/2020_ACCV_ASAN/0543-supp/tsne_ASAN_classification_.pdf
INPUT c:/Users/chris/Documents/Paper/Accepted/2020_ACCV_ASAN/0543-supp/dataset/Office-31/amazon/back_back/frame_0001.jpg
INPUT c:/Users/chris/Documents/Paper/Accepted/2020_ACCV_ASAN/0543-supp/dataset/Office-31/amazon/back_back/frame_0001.jpg
INPUT c:/Users/chris/Documents/Paper/Accepted/2020_ACCV_ASAN/0543-supp/dataset/Office-31/amazon/back_back/frame_0001.jpg
INPUT c:/Users/chris/Documents/Paper/Accepted/2020_ACCV_ASAN/0543-supp/dataset/Office-31/amazon/back_back/frame_0001.jpg
INPUT c:/Users/chris/Documents/Paper/Accepted/2020_ACCV_ASAN/0543-supp/dataset/Office-31/amazon/back_back/frame_0001.jpg
INPUT c:/Users/chris/Documents/Paper/Accepted/2020_ACCV_ASAN/0543-supp/dataset/Office-31/amazon/back_back/frame_0002.jpg
INPUT c:/Users/chris/Documents/Paper/Accepted/2020_ACCV_ASAN/0543-supp/dataset/Office-31/amazon/back_back/frame_0002.jpg
INPUT c:/Users/chris/Documents/Paper/Accepted/2020_ACCV_ASAN/0543-supp/dataset/Office-31/amazon/back_back/frame_0002.jpg
INPUT c:/Users/chris/Documents/Paper/Accepted/2020_ACCV_ASAN/0543-supp/dataset/Office-31/amazon/back_back/frame_0002.jpg
INPUT c:/Users/chris/Documents/Paper/Accepted/2020_ACCV_ASAN/0543-supp/dataset/Office-31/amazon/back_back/frame_0002.jpg
INPUT c:/Users/chris/Documents/Paper/Accepted/2020_ACCV_ASAN/0543-supp/dataset/Office-31/amazon/back_back/frame_0003.jpg
INPUT c:/Users/chris/Documents/Paper/Accepted/2020_ACCV_ASAN/0543-supp/dataset/Office-31/amazon/back_back/frame_0003.jpg
INPUT c:/Users/chris/Documents/Paper/Accepted/2020_ACCV_ASAN/0543-supp/dataset/Office-31/amazon/back_back/frame_0003.jpg
INPUT c:/Users/chris/Documents/Paper/Accepted/2020_ACCV_ASAN/0543-supp/dataset/Office-31/amazon/back_back/frame_0003.jpg
INPUT c:/Users/chris/Documents/Paper/Accepted/2020_ACCV_ASAN/0543-supp/dataset/Office-31/amazon/back_back/frame_0003.jpg
INPUT c:/Users/chris/Documents/Paper/Accepted/2020_ACCV_ASAN/0543-supp/dataset/Office-31/dslr/back_pack/frame_0001.jpg
INPUT c:/Users/chris/Documents/Paper/Accepted/2020_ACCV_ASAN/0543-supp/dataset/Office-31/dslr/back_pack/frame_0001.jpg
INPUT c:/Users/chris/Documents/Paper/Accepted/2020_ACCV_ASAN/0543-supp/dataset/Office-31/dslr/back_pack/frame_0001.jpg
INPUT c:/Users/chris/Documents/Paper/Accepted/2020_ACCV_ASAN/0543-supp/dataset/Office-31/dslr/back_pack/frame_0001.jpg
INPUT c:/Users/chris/Documents/Paper/Accepted/2020_ACCV_ASAN/0543-supp/dataset/Office-31/dslr/back_pack/frame_0001.jpg
INPUT c:/Users/chris/Documents/Paper/Accepted/2020_ACCV_ASAN/0543-supp/dataset/Office-31/dslr/back_pack/frame_0008.jpg
INPUT c:/Users/chris/Documents/Paper/Accepted/2020_ACCV_ASAN/0543-supp/dataset/Office-31/dslr/back_pack/frame_0008.jpg
INPUT c:/Users/chris/Documents/Paper/Accepted/2020_ACCV_ASAN/0543-supp/dataset/Office-31/dslr/back_pack/frame_0008.jpg
INPUT c:/Users/chris/Documents/Paper/Accepted/2020_ACCV_ASAN/0543-supp/dataset/Office-31/dslr/back_pack/frame_0008.jpg
INPUT c:/Users/chris/Documents/Paper/Accepted/2020_ACCV_ASAN/0543-supp/dataset/Office-31/dslr/back_pack/frame_0008.jpg
INPUT c:/Users/chris/Documents/Paper/Accepted/2020_ACCV_ASAN/0543-supp/dataset/Office-31/dslr/back_pack/frame_0012.jpg
INPUT c:/Users/chris/Documents/Paper/Accepted/2020_ACCV_ASAN/0543-supp/dataset/Office-31/dslr/back_pack/frame_0012.jpg
INPUT c:/Users/chris/Documents/Paper/Accepted/2020_ACCV_ASAN/0543-supp/dataset/Office-31/dslr/back_pack/frame_0012.jpg
INPUT c:/Users/chris/Documents/Paper/Accepted/2020_ACCV_ASAN/0543-supp/dataset/Office-31/dslr/back_pack/frame_0012.jpg
INPUT c:/Users/chris/Documents/Paper/Accepted/2020_ACCV_ASAN/0543-supp/dataset/Office-31/dslr/back_pack/frame_0012.jpg
INPUT c:/Users/chris/Documents/Paper/Accepted/2020_ACCV_ASAN/0543-supp/dataset/Office-31/webcam/back_pack/frame_0007.jpg
INPUT c:/Users/chris/Documents/Paper/Accepted/2020_ACCV_ASAN/0543-supp/dataset/Office-31/webcam/back_pack/frame_0007.jpg
INPUT c:/Users/chris/Documents/Paper/Accepted/2020_ACCV_ASAN/0543-supp/dataset/Office-31/webcam/back_pack/frame_0007.jpg
INPUT c:/Users/chris/Documents/Paper/Accepted/2020_ACCV_ASAN/0543-supp/dataset/Office-31/webcam/back_pack/frame_0007.jpg
INPUT c:/Users/chris/Documents/Paper/Accepted/2020_ACCV_ASAN/0543-supp/dataset/Office-31/webcam/back_pack/frame_0007.jpg
INPUT c:/Users/chris/Documents/Paper/Accepted/2020_ACCV_ASAN/0543-supp/dataset/Office-31/webcam/back_pack/frame_0018.jpg
INPUT c:/Users/chris/Documents/Paper/Accepted/2020_ACCV_ASAN/0543-supp/dataset/Office-31/webcam/back_pack/frame_0018.jpg
INPUT c:/Users/chris/Documents/Paper/Accepted/2020_ACCV_ASAN/0543-supp/dataset/Office-31/webcam/back_pack/frame_0018.jpg
INPUT c:/Users/chris/Documents/Paper/Accepted/2020_ACCV_ASAN/0543-supp/dataset/Office-31/webcam/back_pack/frame_0018.jpg
INPUT c:/Users/chris/Documents/Paper/Accepted/2020_ACCV_ASAN/0543-supp/dataset/Office-31/webcam/back_pack/frame_0018.jpg
INPUT c:/Users/chris/Documents/Paper/Accepted/2020_ACCV_ASAN/0543-supp/dataset/Office-31/webcam/back_pack/frame_0026.jpg
INPUT c:/Users/chris/Documents/Paper/Accepted/2020_ACCV_ASAN/0543-supp/dataset/Office-31/webcam/back_pack/frame_0026.jpg
INPUT c:/Users/chris/Documents/Paper/Accepted/2020_ACCV_ASAN/0543-supp/dataset/Office-31/webcam/back_pack/frame_0026.jpg
INPUT c:/Users/chris/Documents/Paper/Accepted/2020_ACCV_ASAN/0543-supp/dataset/Office-31/webcam/back_pack/frame_0026.jpg
INPUT c:/Users/chris/Documents/Paper/Accepted/2020_ACCV_ASAN/0543-supp/dataset/Office-31/webcam/back_pack/frame_0026.jpg
INPUT c:/Users/chris/Documents/Paper/Accepted/2020_ACCV_ASAN/0543-supp/dataset/Office-31/amazon/bike/frame_0001.jpg
INPUT c:/Users/chris/Documents/Paper/Accepted/2020_ACCV_ASAN/0543-supp/dataset/Office-31/amazon/bike/frame_0001.jpg
INPUT c:/Users/chris/Documents/Paper/Accepted/2020_ACCV_ASAN/0543-supp/dataset/Office-31/amazon/bike/frame_0001.jpg
INPUT c:/Users/chris/Documents/Paper/Accepted/2020_ACCV_ASAN/0543-supp/dataset/Office-31/amazon/bike/frame_0001.jpg
INPUT c:/Users/chris/Documents/Paper/Accepted/2020_ACCV_ASAN/0543-supp/dataset/Office-31/amazon/bike/frame_0001.jpg
INPUT c:/Users/chris/Documents/Paper/Accepted/2020_ACCV_ASAN/0543-supp/dataset/Office-31/amazon/bike/frame_0002.jpg
INPUT c:/Users/chris/Documents/Paper/Accepted/2020_ACCV_ASAN/0543-supp/dataset/Office-31/amazon/bike/frame_0002.jpg
INPUT c:/Users/chris/Documents/Paper/Accepted/2020_ACCV_ASAN/0543-supp/dataset/Office-31/amazon/bike/frame_0002.jpg
INPUT c:/Users/chris/Documents/Paper/Accepted/2020_ACCV_ASAN/0543-supp/dataset/Office-31/amazon/bike/frame_0002.jpg
INPUT c:/Users/chris/Documents/Paper/Accepted/2020_ACCV_ASAN/0543-supp/dataset/Office-31/amazon/bike/frame_0002.jpg
INPUT c:/Users/chris/Documents/Paper/Accepted/2020_ACCV_ASAN/0543-supp/dataset/Office-31/amazon/bike/frame_0003.jpg
INPUT c:/Users/chris/Documents/Paper/Accepted/2020_ACCV_ASAN/0543-supp/dataset/Office-31/amazon/bike/frame_0003.jpg
INPUT c:/Users/chris/Documents/Paper/Accepted/2020_ACCV_ASAN/0543-supp/dataset/Office-31/amazon/bike/frame_0003.jpg
INPUT c:/Users/chris/Documents/Paper/Accepted/2020_ACCV_ASAN/0543-supp/dataset/Office-31/amazon/bike/frame_0003.jpg
INPUT c:/Users/chris/Documents/Paper/Accepted/2020_ACCV_ASAN/0543-supp/dataset/Office-31/amazon/bike/frame_0003.jpg
INPUT c:/Users/chris/Documents/Paper/Accepted/2020_ACCV_ASAN/0543-supp/dataset/Office-31/dslr/bike/frame_0001.jpg
INPUT c:/Users/chris/Documents/Paper/Accepted/2020_ACCV_ASAN/0543-supp/dataset/Office-31/dslr/bike/frame_0001.jpg
INPUT c:/Users/chris/Documents/Paper/Accepted/2020_ACCV_ASAN/0543-supp/dataset/Office-31/dslr/bike/frame_0001.jpg
INPUT c:/Users/chris/Documents/Paper/Accepted/2020_ACCV_ASAN/0543-supp/dataset/Office-31/dslr/bike/frame_0001.jpg
INPUT c:/Users/chris/Documents/Paper/Accepted/2020_ACCV_ASAN/0543-supp/dataset/Office-31/dslr/bike/frame_0001.jpg
INPUT c:/Users/chris/Documents/Paper/Accepted/2020_ACCV_ASAN/0543-supp/dataset/Office-31/dslr/bike/frame_0008.jpg
INPUT c:/Users/chris/Documents/Paper/Accepted/2020_ACCV_ASAN/0543-supp/dataset/Office-31/dslr/bike/frame_0008.jpg
INPUT c:/Users/chris/Documents/Paper/Accepted/2020_ACCV_ASAN/0543-supp/dataset/Office-31/dslr/bike/frame_0008.jpg
INPUT c:/Users/chris/Documents/Paper/Accepted/2020_ACCV_ASAN/0543-supp/dataset/Office-31/dslr/bike/frame_0008.jpg
INPUT c:/Users/chris/Documents/Paper/Accepted/2020_ACCV_ASAN/0543-supp/dataset/Office-31/dslr/bike/frame_0008.jpg
INPUT c:/Users/chris/Documents/Paper/Accepted/2020_ACCV_ASAN/0543-supp/dataset/Office-31/dslr/bike/frame_0009.jpg
INPUT c:/Users/chris/Documents/Paper/Accepted/2020_ACCV_ASAN/0543-supp/dataset/Office-31/dslr/bike/frame_0009.jpg
INPUT c:/Users/chris/Documents/Paper/Accepted/2020_ACCV_ASAN/0543-supp/dataset/Office-31/dslr/bike/frame_0009.jpg
INPUT c:/Users/chris/Documents/Paper/Accepted/2020_ACCV_ASAN/0543-supp/dataset/Office-31/dslr/bike/frame_0009.jpg
INPUT c:/Users/chris/Documents/Paper/Accepted/2020_ACCV_ASAN/0543-supp/dataset/Office-31/dslr/bike/frame_0009.jpg
INPUT c:/Users/chris/Documents/Paper/Accepted/2020_ACCV_ASAN/0543-supp/dataset/Office-31/webcam/bike/frame_0002.jpg
INPUT c:/Users/chris/Documents/Paper/Accepted/2020_ACCV_ASAN/0543-supp/dataset/Office-31/webcam/bike/frame_0002.jpg
INPUT c:/Users/chris/Documents/Paper/Accepted/2020_ACCV_ASAN/0543-supp/dataset/Office-31/webcam/bike/frame_0002.jpg
INPUT c:/Users/chris/Documents/Paper/Accepted/2020_ACCV_ASAN/0543-supp/dataset/Office-31/webcam/bike/frame_0002.jpg
INPUT c:/Users/chris/Documents/Paper/Accepted/2020_ACCV_ASAN/0543-supp/dataset/Office-31/webcam/bike/frame_0002.jpg
INPUT c:/Users/chris/Documents/Paper/Accepted/2020_ACCV_ASAN/0543-supp/dataset/Office-31/webcam/bike/frame_0003.jpg
INPUT c:/Users/chris/Documents/Paper/Accepted/2020_ACCV_ASAN/0543-supp/dataset/Office-31/webcam/bike/frame_0003.jpg
INPUT c:/Users/chris/Documents/Paper/Accepted/2020_ACCV_ASAN/0543-supp/dataset/Office-31/webcam/bike/frame_0003.jpg
INPUT c:/Users/chris/Documents/Paper/Accepted/2020_ACCV_ASAN/0543-supp/dataset/Office-31/webcam/bike/frame_0003.jpg
INPUT c:/Users/chris/Documents/Paper/Accepted/2020_ACCV_ASAN/0543-supp/dataset/Office-31/webcam/bike/frame_0003.jpg
INPUT c:/Users/chris/Documents/Paper/Accepted/2020_ACCV_ASAN/0543-supp/dataset/Office-31/webcam/bike/frame_0010.jpg
INPUT c:/Users/chris/Documents/Paper/Accepted/2020_ACCV_ASAN/0543-supp/dataset/Office-31/webcam/bike/frame_0010.jpg
INPUT c:/Users/chris/Documents/Paper/Accepted/2020_ACCV_ASAN/0543-supp/dataset/Office-31/webcam/bike/frame_0010.jpg
INPUT c:/Users/chris/Documents/Paper/Accepted/2020_ACCV_ASAN/0543-supp/dataset/Office-31/webcam/bike/frame_0010.jpg
INPUT c:/Users/chris/Documents/Paper/Accepted/2020_ACCV_ASAN/0543-supp/dataset/Office-31/webcam/bike/frame_0010.jpg
INPUT c:/Users/chris/Documents/Paper/Accepted/2020_ACCV_ASAN/0543-supp/dataset/Office-31/amazon/desk_lamp/frame_0001.jpg
INPUT c:/Users/chris/Documents/Paper/Accepted/2020_ACCV_ASAN/0543-supp/dataset/Office-31/amazon/desk_lamp/frame_0001.jpg
INPUT c:/Users/chris/Documents/Paper/Accepted/2020_ACCV_ASAN/0543-supp/dataset/Office-31/amazon/desk_lamp/frame_0001.jpg
INPUT c:/Users/chris/Documents/Paper/Accepted/2020_ACCV_ASAN/0543-supp/dataset/Office-31/amazon/desk_lamp/frame_0001.jpg
INPUT c:/Users/chris/Documents/Paper/Accepted/2020_ACCV_ASAN/0543-supp/dataset/Office-31/amazon/desk_lamp/frame_0001.jpg
INPUT c:/Users/chris/Documents/Paper/Accepted/2020_ACCV_ASAN/0543-supp/dataset/Office-31/amazon/desk_lamp/frame_0002.jpg
INPUT c:/Users/chris/Documents/Paper/Accepted/2020_ACCV_ASAN/0543-supp/dataset/Office-31/amazon/desk_lamp/frame_0002.jpg
INPUT c:/Users/chris/Documents/Paper/Accepted/2020_ACCV_ASAN/0543-supp/dataset/Office-31/amazon/desk_lamp/frame_0002.jpg
INPUT c:/Users/chris/Documents/Paper/Accepted/2020_ACCV_ASAN/0543-supp/dataset/Office-31/amazon/desk_lamp/frame_0002.jpg
INPUT c:/Users/chris/Documents/Paper/Accepted/2020_ACCV_ASAN/0543-supp/dataset/Office-31/amazon/desk_lamp/frame_0002.jpg
INPUT c:/Users/chris/Documents/Paper/Accepted/2020_ACCV_ASAN/0543-supp/dataset/Office-31/dslr/desk_lamp/frame_0004.jpg
INPUT c:/Users/chris/Documents/Paper/Accepted/2020_ACCV_ASAN/0543-supp/dataset/Office-31/dslr/desk_lamp/frame_0004.jpg
INPUT c:/Users/chris/Documents/Paper/Accepted/2020_ACCV_ASAN/0543-supp/dataset/Office-31/dslr/desk_lamp/frame_0004.jpg
INPUT c:/Users/chris/Documents/Paper/Accepted/2020_ACCV_ASAN/0543-supp/dataset/Office-31/dslr/desk_lamp/frame_0004.jpg
INPUT c:/Users/chris/Documents/Paper/Accepted/2020_ACCV_ASAN/0543-supp/dataset/Office-31/dslr/desk_lamp/frame_0004.jpg
INPUT c:/Users/chris/Documents/Paper/Accepted/2020_ACCV_ASAN/0543-supp/dataset/Office-31/dslr/desk_lamp/frame_0006.jpg
INPUT c:/Users/chris/Documents/Paper/Accepted/2020_ACCV_ASAN/0543-supp/dataset/Office-31/dslr/desk_lamp/frame_0006.jpg
INPUT c:/Users/chris/Documents/Paper/Accepted/2020_ACCV_ASAN/0543-supp/dataset/Office-31/dslr/desk_lamp/frame_0006.jpg
INPUT c:/Users/chris/Documents/Paper/Accepted/2020_ACCV_ASAN/0543-supp/dataset/Office-31/dslr/desk_lamp/frame_0006.jpg
INPUT c:/Users/chris/Documents/Paper/Accepted/2020_ACCV_ASAN/0543-supp/dataset/Office-31/dslr/desk_lamp/frame_0006.jpg
INPUT c:/Users/chris/Documents/Paper/Accepted/2020_ACCV_ASAN/0543-supp/dataset/Office-31/dslr/desk_lamp/frame_0004.jpg
INPUT c:/Users/chris/Documents/Paper/Accepted/2020_ACCV_ASAN/0543-supp/dataset/Office-31/dslr/desk_lamp/frame_0004.jpg
INPUT c:/Users/chris/Documents/Paper/Accepted/2020_ACCV_ASAN/0543-supp/dataset/Office-31/dslr/desk_lamp/frame_0010.jpg
INPUT c:/Users/chris/Documents/Paper/Accepted/2020_ACCV_ASAN/0543-supp/dataset/Office-31/dslr/desk_lamp/frame_0010.jpg
INPUT c:/Users/chris/Documents/Paper/Accepted/2020_ACCV_ASAN/0543-supp/dataset/Office-31/dslr/desk_lamp/frame_0010.jpg
INPUT c:/Users/chris/Documents/Paper/Accepted/2020_ACCV_ASAN/0543-supp/dataset/Office-31/dslr/desk_lamp/frame_0010.jpg
INPUT c:/Users/chris/Documents/Paper/Accepted/2020_ACCV_ASAN/0543-supp/dataset/Office-31/dslr/desk_lamp/frame_0010.jpg
INPUT c:/Users/chris/Documents/Paper/Accepted/2020_ACCV_ASAN/0543-supp/dataset/Office-31/webcam/desk_lamp/frame_0006.jpg
INPUT c:/Users/chris/Documents/Paper/Accepted/2020_ACCV_ASAN/0543-supp/dataset/Office-31/webcam/desk_lamp/frame_0006.jpg
INPUT c:/Users/chris/Documents/Paper/Accepted/2020_ACCV_ASAN/0543-supp/dataset/Office-31/webcam/desk_lamp/frame_0006.jpg
INPUT c:/Users/chris/Documents/Paper/Accepted/2020_ACCV_ASAN/0543-supp/dataset/Office-31/webcam/desk_lamp/frame_0006.jpg
INPUT c:/Users/chris/Documents/Paper/Accepted/2020_ACCV_ASAN/0543-supp/dataset/Office-31/webcam/desk_lamp/frame_0006.jpg
INPUT c:/Users/chris/Documents/Paper/Accepted/2020_ACCV_ASAN/0543-supp/dataset/Office-31/webcam/desk_lamp/frame_0008.jpg
INPUT c:/Users/chris/Documents/Paper/Accepted/2020_ACCV_ASAN/0543-supp/dataset/Office-31/webcam/desk_lamp/frame_0008.jpg
INPUT c:/Users/chris/Documents/Paper/Accepted/2020_ACCV_ASAN/0543-supp/dataset/Office-31/webcam/desk_lamp/frame_0008.jpg
INPUT c:/Users/chris/Documents/Paper/Accepted/2020_ACCV_ASAN/0543-supp/dataset/Office-31/webcam/desk_lamp/frame_0008.jpg
INPUT c:/Users/chris/Documents/Paper/Accepted/2020_ACCV_ASAN/0543-supp/dataset/Office-31/webcam/desk_lamp/frame_0008.jpg
INPUT c:/Users/chris/Documents/Paper/Accepted/2020_ACCV_ASAN/0543-supp/dataset/Office-31/webcam/desk_lamp/frame_0012.jpg
INPUT c:/Users/chris/Documents/Paper/Accepted/2020_ACCV_ASAN/0543-supp/dataset/Office-31/webcam/desk_lamp/frame_0012.jpg
INPUT c:/Users/chris/Documents/Paper/Accepted/2020_ACCV_ASAN/0543-supp/dataset/Office-31/webcam/desk_lamp/frame_0012.jpg
INPUT c:/Users/chris/Documents/Paper/Accepted/2020_ACCV_ASAN/0543-supp/dataset/Office-31/webcam/desk_lamp/frame_0012.jpg
INPUT c:/Users/chris/Documents/Paper/Accepted/2020_ACCV_ASAN/0543-supp/dataset/Office-31/webcam/desk_lamp/frame_0012.jpg
INPUT c:/Users/chris/Documents/Paper/Accepted/2020_ACCV_ASAN/0543-supp/dataset/imageClef/c/0/251_0023.jpg
INPUT c:/Users/chris/Documents/Paper/Accepted/2020_ACCV_ASAN/0543-supp/dataset/imageClef/c/0/251_0023.jpg
INPUT c:/Users/chris/Documents/Paper/Accepted/2020_ACCV_ASAN/0543-supp/dataset/imageClef/c/0/251_0023.jpg
INPUT c:/Users/chris/Documents/Paper/Accepted/2020_ACCV_ASAN/0543-supp/dataset/imageClef/c/0/251_0023.jpg
INPUT c:/Users/chris/Documents/Paper/Accepted/2020_ACCV_ASAN/0543-supp/dataset/imageClef/c/0/251_0023.jpg
INPUT c:/Users/chris/Documents/Paper/Accepted/2020_ACCV_ASAN/0543-supp/dataset/imageClef/c/0/251_0090.jpg
INPUT c:/Users/chris/Documents/Paper/Accepted/2020_ACCV_ASAN/0543-supp/dataset/imageClef/c/0/251_0090.jpg
INPUT c:/Users/chris/Documents/Paper/Accepted/2020_ACCV_ASAN/0543-supp/dataset/imageClef/c/0/251_0090.jpg
INPUT c:/Users/chris/Documents/Paper/Accepted/2020_ACCV_ASAN/0543-supp/dataset/imageClef/c/0/251_0090.jpg
INPUT c:/Users/chris/Documents/Paper/Accepted/2020_ACCV_ASAN/0543-supp/dataset/imageClef/c/0/251_0090.jpg
INPUT c:/Users/chris/Documents/Paper/Accepted/2020_ACCV_ASAN/0543-supp/dataset/imageClef/c/0/251_0115.jpg
INPUT c:/Users/chris/Documents/Paper/Accepted/2020_ACCV_ASAN/0543-supp/dataset/imageClef/c/0/251_0115.jpg
INPUT c:/Users/chris/Documents/Paper/Accepted/2020_ACCV_ASAN/0543-supp/dataset/imageClef/c/0/251_0115.jpg
INPUT c:/Users/chris/Documents/Paper/Accepted/2020_ACCV_ASAN/0543-supp/dataset/imageClef/c/0/251_0115.jpg
INPUT c:/Users/chris/Documents/Paper/Accepted/2020_ACCV_ASAN/0543-supp/dataset/imageClef/c/0/251_0115.jpg
INPUT c:/Users/chris/Documents/Paper/Accepted/2020_ACCV_ASAN/0543-supp/dataset/imageClef/p/0/2008_005905.jpg
INPUT c:/Users/chris/Documents/Paper/Accepted/2020_ACCV_ASAN/0543-supp/dataset/imageClef/p/0/2008_005905.jpg
INPUT c:/Users/chris/Documents/Paper/Accepted/2020_ACCV_ASAN/0543-supp/dataset/imageClef/p/0/2008_005905.jpg
INPUT c:/Users/chris/Documents/Paper/Accepted/2020_ACCV_ASAN/0543-supp/dataset/imageClef/p/0/2008_005905.jpg
INPUT c:/Users/chris/Documents/Paper/Accepted/2020_ACCV_ASAN/0543-supp/dataset/imageClef/p/0/2008_005905.jpg
INPUT c:/Users/chris/Documents/Paper/Accepted/2020_ACCV_ASAN/0543-supp/dataset/imageClef/p/0/2011_002751.jpg
INPUT c:/Users/chris/Documents/Paper/Accepted/2020_ACCV_ASAN/0543-supp/dataset/imageClef/p/0/2011_002751.jpg
INPUT c:/Users/chris/Documents/Paper/Accepted/2020_ACCV_ASAN/0543-supp/dataset/imageClef/p/0/2011_002751.jpg
INPUT c:/Users/chris/Documents/Paper/Accepted/2020_ACCV_ASAN/0543-supp/dataset/imageClef/p/0/2011_002751.jpg
INPUT c:/Users/chris/Documents/Paper/Accepted/2020_ACCV_ASAN/0543-supp/dataset/imageClef/p/0/2011_002751.jpg
INPUT c:/Users/chris/Documents/Paper/Accepted/2020_ACCV_ASAN/0543-supp/dataset/imageClef/p/0/2011_002993.jpg
INPUT c:/Users/chris/Documents/Paper/Accepted/2020_ACCV_ASAN/0543-supp/dataset/imageClef/p/0/2011_002993.jpg
INPUT c:/Users/chris/Documents/Paper/Accepted/2020_ACCV_ASAN/0543-supp/dataset/imageClef/p/0/2011_002993.jpg
INPUT c:/Users/chris/Documents/Paper/Accepted/2020_ACCV_ASAN/0543-supp/dataset/imageClef/p/0/2011_002993.jpg
INPUT c:/Users/chris/Documents/Paper/Accepted/2020_ACCV_ASAN/0543-supp/dataset/imageClef/p/0/2011_002993.jpg
INPUT c:/Users/chris/Documents/Paper/Accepted/2020_ACCV_ASAN/0543-supp/dataset/imageClef/i/0/n02691156_11729.JPEG
INPUT c:/Users/chris/Documents/Paper/Accepted/2020_ACCV_ASAN/0543-supp/dataset/imageClef/i/0/n02691156_11729.JPEG
INPUT c:/Users/chris/Documents/Paper/Accepted/2020_ACCV_ASAN/0543-supp/dataset/imageClef/i/0/n02691156_11729.JPEG
INPUT c:/Users/chris/Documents/Paper/Accepted/2020_ACCV_ASAN/0543-supp/dataset/imageClef/i/0/n02691156_11729.JPEG
INPUT c:/Users/chris/Documents/Paper/Accepted/2020_ACCV_ASAN/0543-supp/dataset/imageClef/i/0/n02691156_11729.JPEG
INPUT c:/Users/chris/Documents/Paper/Accepted/2020_ACCV_ASAN/0543-supp/dataset/imageClef/i/0/n02691156_1806.JPEG
INPUT c:/Users/chris/Documents/Paper/Accepted/2020_ACCV_ASAN/0543-supp/dataset/imageClef/i/0/n02691156_1806.JPEG
INPUT c:/Users/chris/Documents/Paper/Accepted/2020_ACCV_ASAN/0543-supp/dataset/imageClef/i/0/n02691156_1806.JPEG
INPUT c:/Users/chris/Documents/Paper/Accepted/2020_ACCV_ASAN/0543-supp/dataset/imageClef/i/0/n02691156_1806.JPEG
INPUT c:/Users/chris/Documents/Paper/Accepted/2020_ACCV_ASAN/0543-supp/dataset/imageClef/i/0/n02691156_1806.JPEG
INPUT c:/Users/chris/Documents/Paper/Accepted/2020_ACCV_ASAN/0543-supp/dataset/imageClef/i/0/n02691156_49198.JPEG
INPUT c:/Users/chris/Documents/Paper/Accepted/2020_ACCV_ASAN/0543-supp/dataset/imageClef/i/0/n02691156_49198.JPEG
INPUT c:/Users/chris/Documents/Paper/Accepted/2020_ACCV_ASAN/0543-supp/dataset/imageClef/i/0/n02691156_49198.JPEG
INPUT c:/Users/chris/Documents/Paper/Accepted/2020_ACCV_ASAN/0543-supp/dataset/imageClef/i/0/n02691156_49198.JPEG
INPUT c:/Users/chris/Documents/Paper/Accepted/2020_ACCV_ASAN/0543-supp/dataset/imageClef/i/0/n02691156_49198.JPEG
INPUT c:/Users/chris/Documents/Paper/Accepted/2020_ACCV_ASAN/0543-supp/dataset/imageClef/c/1/224_0007.jpg
INPUT c:/Users/chris/Documents/Paper/Accepted/2020_ACCV_ASAN/0543-supp/dataset/imageClef/c/1/224_0007.jpg
INPUT c:/Users/chris/Documents/Paper/Accepted/2020_ACCV_ASAN/0543-supp/dataset/imageClef/c/1/224_0007.jpg
INPUT c:/Users/chris/Documents/Paper/Accepted/2020_ACCV_ASAN/0543-supp/dataset/imageClef/c/1/224_0007.jpg
INPUT c:/Users/chris/Documents/Paper/Accepted/2020_ACCV_ASAN/0543-supp/dataset/imageClef/c/1/224_0007.jpg
INPUT c:/Users/chris/Documents/Paper/Accepted/2020_ACCV_ASAN/0543-supp/dataset/imageClef/c/1/224_0044.jpg
INPUT c:/Users/chris/Documents/Paper/Accepted/2020_ACCV_ASAN/0543-supp/dataset/imageClef/c/1/224_0044.jpg
INPUT c:/Users/chris/Documents/Paper/Accepted/2020_ACCV_ASAN/0543-supp/dataset/imageClef/c/1/224_0044.jpg
INPUT c:/Users/chris/Documents/Paper/Accepted/2020_ACCV_ASAN/0543-supp/dataset/imageClef/c/1/224_0044.jpg
INPUT c:/Users/chris/Documents/Paper/Accepted/2020_ACCV_ASAN/0543-supp/dataset/imageClef/c/1/224_0044.jpg
INPUT c:/Users/chris/Documents/Paper/Accepted/2020_ACCV_ASAN/0543-supp/dataset/imageClef/c/1/224_0067.jpg
INPUT c:/Users/chris/Documents/Paper/Accepted/2020_ACCV_ASAN/0543-supp/dataset/imageClef/c/1/224_0067.jpg
INPUT c:/Users/chris/Documents/Paper/Accepted/2020_ACCV_ASAN/0543-supp/dataset/imageClef/c/1/224_0067.jpg
INPUT c:/Users/chris/Documents/Paper/Accepted/2020_ACCV_ASAN/0543-supp/dataset/imageClef/c/1/224_0067.jpg
INPUT c:/Users/chris/Documents/Paper/Accepted/2020_ACCV_ASAN/0543-supp/dataset/imageClef/c/1/224_0067.jpg
INPUT c:/Users/chris/Documents/Paper/Accepted/2020_ACCV_ASAN/0543-supp/dataset/imageClef/p/1/2008_005175.jpg
INPUT c:/Users/chris/Documents/Paper/Accepted/2020_ACCV_ASAN/0543-supp/dataset/imageClef/p/1/2008_005175.jpg
INPUT c:/Users/chris/Documents/Paper/Accepted/2020_ACCV_ASAN/0543-supp/dataset/imageClef/p/1/2008_005175.jpg
INPUT c:/Users/chris/Documents/Paper/Accepted/2020_ACCV_ASAN/0543-supp/dataset/imageClef/p/1/2008_005175.jpg
INPUT c:/Users/chris/Documents/Paper/Accepted/2020_ACCV_ASAN/0543-supp/dataset/imageClef/p/1/2008_005175.jpg
INPUT c:/Users/chris/Documents/Paper/Accepted/2020_ACCV_ASAN/0543-supp/dataset/imageClef/p/1/2008_007510.jpg
INPUT c:/Users/chris/Documents/Paper/Accepted/2020_ACCV_ASAN/0543-supp/dataset/imageClef/p/1/2008_007510.jpg
INPUT c:/Users/chris/Documents/Paper/Accepted/2020_ACCV_ASAN/0543-supp/dataset/imageClef/p/1/2008_007510.jpg
INPUT c:/Users/chris/Documents/Paper/Accepted/2020_ACCV_ASAN/0543-supp/dataset/imageClef/p/1/2008_007510.jpg
INPUT c:/Users/chris/Documents/Paper/Accepted/2020_ACCV_ASAN/0543-supp/dataset/imageClef/p/1/2008_007510.jpg
INPUT c:/Users/chris/Documents/Paper/Accepted/2020_ACCV_ASAN/0543-supp/dataset/imageClef/p/1/2011_000087.jpg
INPUT c:/Users/chris/Documents/Paper/Accepted/2020_ACCV_ASAN/0543-supp/dataset/imageClef/p/1/2011_000087.jpg
INPUT c:/Users/chris/Documents/Paper/Accepted/2020_ACCV_ASAN/0543-supp/dataset/imageClef/p/1/2011_000087.jpg
INPUT c:/Users/chris/Documents/Paper/Accepted/2020_ACCV_ASAN/0543-supp/dataset/imageClef/p/1/2011_000087.jpg
INPUT c:/Users/chris/Documents/Paper/Accepted/2020_ACCV_ASAN/0543-supp/dataset/imageClef/p/1/2011_000087.jpg
INPUT c:/Users/chris/Documents/Paper/Accepted/2020_ACCV_ASAN/0543-supp/dataset/imageClef/i/1/n02834778_2737.JPEG
INPUT c:/Users/chris/Documents/Paper/Accepted/2020_ACCV_ASAN/0543-supp/dataset/imageClef/i/1/n02834778_2737.JPEG
INPUT c:/Users/chris/Documents/Paper/Accepted/2020_ACCV_ASAN/0543-supp/dataset/imageClef/i/1/n02834778_2737.JPEG
INPUT c:/Users/chris/Documents/Paper/Accepted/2020_ACCV_ASAN/0543-supp/dataset/imageClef/i/1/n02834778_2737.JPEG
INPUT c:/Users/chris/Documents/Paper/Accepted/2020_ACCV_ASAN/0543-supp/dataset/imageClef/i/1/n02834778_2737.JPEG
INPUT c:/Users/chris/Documents/Paper/Accepted/2020_ACCV_ASAN/0543-supp/dataset/imageClef/i/1/n02834778_763.JPEG
INPUT c:/Users/chris/Documents/Paper/Accepted/2020_ACCV_ASAN/0543-supp/dataset/imageClef/i/1/n02834778_763.JPEG
INPUT c:/Users/chris/Documents/Paper/Accepted/2020_ACCV_ASAN/0543-supp/dataset/imageClef/i/1/n02834778_763.JPEG
INPUT c:/Users/chris/Documents/Paper/Accepted/2020_ACCV_ASAN/0543-supp/dataset/imageClef/i/1/n02834778_763.JPEG
INPUT c:/Users/chris/Documents/Paper/Accepted/2020_ACCV_ASAN/0543-supp/dataset/imageClef/i/1/n02834778_763.JPEG
INPUT c:/Users/chris/Documents/Paper/Accepted/2020_ACCV_ASAN/0543-supp/dataset/imageClef/i/1/n02834778_8949.JPEG
INPUT c:/Users/chris/Documents/Paper/Accepted/2020_ACCV_ASAN/0543-supp/dataset/imageClef/i/1/n02834778_8949.JPEG
INPUT c:/Users/chris/Documents/Paper/Accepted/2020_ACCV_ASAN/0543-supp/dataset/imageClef/i/1/n02834778_8949.JPEG
INPUT c:/Users/chris/Documents/Paper/Accepted/2020_ACCV_ASAN/0543-supp/dataset/imageClef/i/1/n02834778_8949.JPEG
INPUT c:/Users/chris/Documents/Paper/Accepted/2020_ACCV_ASAN/0543-supp/dataset/imageClef/i/1/n02834778_8949.JPEG
INPUT c:/Users/chris/Documents/Paper/Accepted/2020_ACCV_ASAN/0543-supp/dataset/imageClef/c/2/113_0022.jpg
INPUT c:/Users/chris/Documents/Paper/Accepted/2020_ACCV_ASAN/0543-supp/dataset/imageClef/c/2/113_0022.jpg
INPUT c:/Users/chris/Documents/Paper/Accepted/2020_ACCV_ASAN/0543-supp/dataset/imageClef/c/2/113_0022.jpg
INPUT c:/Users/chris/Documents/Paper/Accepted/2020_ACCV_ASAN/0543-supp/dataset/imageClef/c/2/113_0022.jpg
INPUT c:/Users/chris/Documents/Paper/Accepted/2020_ACCV_ASAN/0543-supp/dataset/imageClef/c/2/113_0022.jpg
INPUT c:/Users/chris/Documents/Paper/Accepted/2020_ACCV_ASAN/0543-supp/dataset/imageClef/c/2/113_0115.jpg
INPUT c:/Users/chris/Documents/Paper/Accepted/2020_ACCV_ASAN/0543-supp/dataset/imageClef/c/2/113_0115.jpg
INPUT c:/Users/chris/Documents/Paper/Accepted/2020_ACCV_ASAN/0543-supp/dataset/imageClef/c/2/113_0115.jpg
INPUT c:/Users/chris/Documents/Paper/Accepted/2020_ACCV_ASAN/0543-supp/dataset/imageClef/c/2/113_0115.jpg
INPUT c:/Users/chris/Documents/Paper/Accepted/2020_ACCV_ASAN/0543-supp/dataset/imageClef/c/2/113_0115.jpg
INPUT c:/Users/chris/Documents/Paper/Accepted/2020_ACCV_ASAN/0543-supp/dataset/imageClef/c/2/113_0116.jpg
INPUT c:/Users/chris/Documents/Paper/Accepted/2020_ACCV_ASAN/0543-supp/dataset/imageClef/c/2/113_0116.jpg
INPUT c:/Users/chris/Documents/Paper/Accepted/2020_ACCV_ASAN/0543-supp/dataset/imageClef/c/2/113_0116.jpg
INPUT c:/Users/chris/Documents/Paper/Accepted/2020_ACCV_ASAN/0543-supp/dataset/imageClef/c/2/113_0116.jpg
INPUT c:/Users/chris/Documents/Paper/Accepted/2020_ACCV_ASAN/0543-supp/dataset/imageClef/c/2/113_0116.jpg
INPUT c:/Users/chris/Documents/Paper/Accepted/2020_ACCV_ASAN/0543-supp/dataset/imageClef/p/2/2008_007003.jpg
INPUT c:/Users/chris/Documents/Paper/Accepted/2020_ACCV_ASAN/0543-supp/dataset/imageClef/p/2/2008_007003.jpg
INPUT c:/Users/chris/Documents/Paper/Accepted/2020_ACCV_ASAN/0543-supp/dataset/imageClef/p/2/2008_007003.jpg
INPUT c:/Users/chris/Documents/Paper/Accepted/2020_ACCV_ASAN/0543-supp/dataset/imageClef/p/2/2008_007003.jpg
INPUT c:/Users/chris/Documents/Paper/Accepted/2020_ACCV_ASAN/0543-supp/dataset/imageClef/p/2/2008_007003.jpg
INPUT c:/Users/chris/Documents/Paper/Accepted/2020_ACCV_ASAN/0543-supp/dataset/imageClef/p/2/2008_007486.jpg
INPUT c:/Users/chris/Documents/Paper/Accepted/2020_ACCV_ASAN/0543-supp/dataset/imageClef/p/2/2008_007486.jpg
INPUT c:/Users/chris/Documents/Paper/Accepted/2020_ACCV_ASAN/0543-supp/dataset/imageClef/p/2/2008_007486.jpg
INPUT c:/Users/chris/Documents/Paper/Accepted/2020_ACCV_ASAN/0543-supp/dataset/imageClef/p/2/2008_007486.jpg
INPUT c:/Users/chris/Documents/Paper/Accepted/2020_ACCV_ASAN/0543-supp/dataset/imageClef/p/2/2008_007486.jpg
INPUT c:/Users/chris/Documents/Paper/Accepted/2020_ACCV_ASAN/0543-supp/dataset/imageClef/p/2/2009_003285.jpg
INPUT c:/Users/chris/Documents/Paper/Accepted/2020_ACCV_ASAN/0543-supp/dataset/imageClef/p/2/2009_003285.jpg
INPUT c:/Users/chris/Documents/Paper/Accepted/2020_ACCV_ASAN/0543-supp/dataset/imageClef/p/2/2009_003285.jpg
INPUT c:/Users/chris/Documents/Paper/Accepted/2020_ACCV_ASAN/0543-supp/dataset/imageClef/p/2/2009_003285.jpg
INPUT c:/Users/chris/Documents/Paper/Accepted/2020_ACCV_ASAN/0543-supp/dataset/imageClef/p/2/2009_003285.jpg
INPUT c:/Users/chris/Documents/Paper/Accepted/2020_ACCV_ASAN/0543-supp/dataset/imageClef/i/2/n01503061_12696.JPEG
INPUT c:/Users/chris/Documents/Paper/Accepted/2020_ACCV_ASAN/0543-supp/dataset/imageClef/i/2/n01503061_12696.JPEG
INPUT c:/Users/chris/Documents/Paper/Accepted/2020_ACCV_ASAN/0543-supp/dataset/imageClef/i/2/n01503061_12696.JPEG
INPUT c:/Users/chris/Documents/Paper/Accepted/2020_ACCV_ASAN/0543-supp/dataset/imageClef/i/2/n01503061_12696.JPEG
INPUT c:/Users/chris/Documents/Paper/Accepted/2020_ACCV_ASAN/0543-supp/dataset/imageClef/i/2/n01503061_12696.JPEG
INPUT c:/Users/chris/Documents/Paper/Accepted/2020_ACCV_ASAN/0543-supp/dataset/imageClef/i/2/n01503061_14761.JPEG
INPUT c:/Users/chris/Documents/Paper/Accepted/2020_ACCV_ASAN/0543-supp/dataset/imageClef/i/2/n01503061_14761.JPEG
INPUT c:/Users/chris/Documents/Paper/Accepted/2020_ACCV_ASAN/0543-supp/dataset/imageClef/i/2/n01503061_14761.JPEG
INPUT c:/Users/chris/Documents/Paper/Accepted/2020_ACCV_ASAN/0543-supp/dataset/imageClef/i/2/n01503061_14761.JPEG
INPUT c:/Users/chris/Documents/Paper/Accepted/2020_ACCV_ASAN/0543-supp/dataset/imageClef/i/2/n01503061_14761.JPEG
INPUT c:/Users/chris/Documents/Paper/Accepted/2020_ACCV_ASAN/0543-supp/dataset/imageClef/i/2/n01503061_3094.JPEG
INPUT c:/Users/chris/Documents/Paper/Accepted/2020_ACCV_ASAN/0543-supp/dataset/imageClef/i/2/n01503061_3094.JPEG
INPUT c:/Users/chris/Documents/Paper/Accepted/2020_ACCV_ASAN/0543-supp/dataset/imageClef/i/2/n01503061_3094.JPEG
INPUT c:/Users/chris/Documents/Paper/Accepted/2020_ACCV_ASAN/0543-supp/dataset/imageClef/i/2/n01503061_3094.JPEG
INPUT c:/Users/chris/Documents/Paper/Accepted/2020_ACCV_ASAN/0543-supp/dataset/imageClef/i/2/n01503061_3094.JPEG
INPUT c:/Users/chris/Documents/Paper/Accepted/2020_ACCV_ASAN/0543-supp/dataset/Office-Home/Art/calculator/00001.jpg
INPUT c:/Users/chris/Documents/Paper/Accepted/2020_ACCV_ASAN/0543-supp/dataset/Office-Home/Art/calculator/00001.jpg
INPUT c:/Users/chris/Documents/Paper/Accepted/2020_ACCV_ASAN/0543-supp/dataset/Office-Home/Art/calculator/00001.jpg
INPUT c:/Users/chris/Documents/Paper/Accepted/2020_ACCV_ASAN/0543-supp/dataset/Office-Home/Art/calculator/00001.jpg
INPUT c:/Users/chris/Documents/Paper/Accepted/2020_ACCV_ASAN/0543-supp/dataset/Office-Home/Art/calculator/00001.jpg
INPUT c:/Users/chris/Documents/Paper/Accepted/2020_ACCV_ASAN/0543-supp/dataset/Office-Home/Art/calculator/00004.jpg
INPUT c:/Users/chris/Documents/Paper/Accepted/2020_ACCV_ASAN/0543-supp/dataset/Office-Home/Art/calculator/00004.jpg
INPUT c:/Users/chris/Documents/Paper/Accepted/2020_ACCV_ASAN/0543-supp/dataset/Office-Home/Art/calculator/00004.jpg
INPUT c:/Users/chris/Documents/Paper/Accepted/2020_ACCV_ASAN/0543-supp/dataset/Office-Home/Art/calculator/00004.jpg
INPUT c:/Users/chris/Documents/Paper/Accepted/2020_ACCV_ASAN/0543-supp/dataset/Office-Home/Art/calculator/00004.jpg
INPUT c:/Users/chris/Documents/Paper/Accepted/2020_ACCV_ASAN/0543-supp/dataset/Office-Home/Art/calculator/00006.jpg
INPUT c:/Users/chris/Documents/Paper/Accepted/2020_ACCV_ASAN/0543-supp/dataset/Office-Home/Art/calculator/00006.jpg
INPUT c:/Users/chris/Documents/Paper/Accepted/2020_ACCV_ASAN/0543-supp/dataset/Office-Home/Art/calculator/00006.jpg
INPUT c:/Users/chris/Documents/Paper/Accepted/2020_ACCV_ASAN/0543-supp/dataset/Office-Home/Art/calculator/00006.jpg
INPUT c:/Users/chris/Documents/Paper/Accepted/2020_ACCV_ASAN/0543-supp/dataset/Office-Home/Art/calculator/00006.jpg
INPUT c:/Users/chris/Documents/Paper/Accepted/2020_ACCV_ASAN/0543-supp/dataset/Office-Home/Real_World/calculator/00001.jpg
INPUT c:/Users/chris/Documents/Paper/Accepted/2020_ACCV_ASAN/0543-supp/dataset/Office-Home/Real_World/calculator/00001.jpg
INPUT c:/Users/chris/Documents/Paper/Accepted/2020_ACCV_ASAN/0543-supp/dataset/Office-Home/Real_World/calculator/00001.jpg
INPUT c:/Users/chris/Documents/Paper/Accepted/2020_ACCV_ASAN/0543-supp/dataset/Office-Home/Real_World/calculator/00001.jpg
INPUT c:/Users/chris/Documents/Paper/Accepted/2020_ACCV_ASAN/0543-supp/dataset/Office-Home/Real_World/calculator/00001.jpg
INPUT c:/Users/chris/Documents/Paper/Accepted/2020_ACCV_ASAN/0543-supp/dataset/Office-Home/Real_World/calculator/00002.jpg
INPUT c:/Users/chris/Documents/Paper/Accepted/2020_ACCV_ASAN/0543-supp/dataset/Office-Home/Real_World/calculator/00002.jpg
INPUT c:/Users/chris/Documents/Paper/Accepted/2020_ACCV_ASAN/0543-supp/dataset/Office-Home/Real_World/calculator/00002.jpg
INPUT c:/Users/chris/Documents/Paper/Accepted/2020_ACCV_ASAN/0543-supp/dataset/Office-Home/Real_World/calculator/00002.jpg
INPUT c:/Users/chris/Documents/Paper/Accepted/2020_ACCV_ASAN/0543-supp/dataset/Office-Home/Real_World/calculator/00002.jpg
INPUT c:/Users/chris/Documents/Paper/Accepted/2020_ACCV_ASAN/0543-supp/dataset/Office-Home/Real_World/calculator/00003.jpg
INPUT c:/Users/chris/Documents/Paper/Accepted/2020_ACCV_ASAN/0543-supp/dataset/Office-Home/Real_World/calculator/00003.jpg
INPUT c:/Users/chris/Documents/Paper/Accepted/2020_ACCV_ASAN/0543-supp/dataset/Office-Home/Real_World/calculator/00003.jpg
INPUT c:/Users/chris/Documents/Paper/Accepted/2020_ACCV_ASAN/0543-supp/dataset/Office-Home/Real_World/calculator/00003.jpg
INPUT c:/Users/chris/Documents/Paper/Accepted/2020_ACCV_ASAN/0543-supp/dataset/Office-Home/Real_World/calculator/00003.jpg
INPUT c:/Users/chris/Documents/Paper/Accepted/2020_ACCV_ASAN/0543-supp/dataset/Office-Home/Product/calculator/00013.jpg
INPUT c:/Users/chris/Documents/Paper/Accepted/2020_ACCV_ASAN/0543-supp/dataset/Office-Home/Product/calculator/00013.jpg
INPUT c:/Users/chris/Documents/Paper/Accepted/2020_ACCV_ASAN/0543-supp/dataset/Office-Home/Product/calculator/00013.jpg
INPUT c:/Users/chris/Documents/Paper/Accepted/2020_ACCV_ASAN/0543-supp/dataset/Office-Home/Product/calculator/00013.jpg
INPUT c:/Users/chris/Documents/Paper/Accepted/2020_ACCV_ASAN/0543-supp/dataset/Office-Home/Product/calculator/00013.jpg
INPUT c:/Users/chris/Documents/Paper/Accepted/2020_ACCV_ASAN/0543-supp/dataset/Office-Home/Product/calculator/00022.jpg
INPUT c:/Users/chris/Documents/Paper/Accepted/2020_ACCV_ASAN/0543-supp/dataset/Office-Home/Product/calculator/00022.jpg
INPUT c:/Users/chris/Documents/Paper/Accepted/2020_ACCV_ASAN/0543-supp/dataset/Office-Home/Product/calculator/00022.jpg
INPUT c:/Users/chris/Documents/Paper/Accepted/2020_ACCV_ASAN/0543-supp/dataset/Office-Home/Product/calculator/00022.jpg
INPUT c:/Users/chris/Documents/Paper/Accepted/2020_ACCV_ASAN/0543-supp/dataset/Office-Home/Product/calculator/00022.jpg
INPUT c:/Users/chris/Documents/Paper/Accepted/2020_ACCV_ASAN/0543-supp/dataset/Office-Home/Product/calculator/00041.jpg
INPUT c:/Users/chris/Documents/Paper/Accepted/2020_ACCV_ASAN/0543-supp/dataset/Office-Home/Product/calculator/00041.jpg
INPUT c:/Users/chris/Documents/Paper/Accepted/2020_ACCV_ASAN/0543-supp/dataset/Office-Home/Product/calculator/00041.jpg
INPUT c:/Users/chris/Documents/Paper/Accepted/2020_ACCV_ASAN/0543-supp/dataset/Office-Home/Product/calculator/00041.jpg
INPUT c:/Users/chris/Documents/Paper/Accepted/2020_ACCV_ASAN/0543-supp/dataset/Office-Home/Product/calculator/00041.jpg
INPUT c:/Users/chris/Documents/Paper/Accepted/2020_ACCV_ASAN/0543-supp/dataset/Office-Home/Art/helmet/00053.jpg
INPUT c:/Users/chris/Documents/Paper/Accepted/2020_ACCV_ASAN/0543-supp/dataset/Office-Home/Art/helmet/00053.jpg
INPUT c:/Users/chris/Documents/Paper/Accepted/2020_ACCV_ASAN/0543-supp/dataset/Office-Home/Art/helmet/00053.jpg
INPUT c:/Users/chris/Documents/Paper/Accepted/2020_ACCV_ASAN/0543-supp/dataset/Office-Home/Art/helmet/00053.jpg
INPUT c:/Users/chris/Documents/Paper/Accepted/2020_ACCV_ASAN/0543-supp/dataset/Office-Home/Art/helmet/00053.jpg
INPUT c:/Users/chris/Documents/Paper/Accepted/2020_ACCV_ASAN/0543-supp/dataset/Office-Home/Art/helmet/00073.jpg
INPUT c:/Users/chris/Documents/Paper/Accepted/2020_ACCV_ASAN/0543-supp/dataset/Office-Home/Art/helmet/00073.jpg
INPUT c:/Users/chris/Documents/Paper/Accepted/2020_ACCV_ASAN/0543-supp/dataset/Office-Home/Art/helmet/00073.jpg
INPUT c:/Users/chris/Documents/Paper/Accepted/2020_ACCV_ASAN/0543-supp/dataset/Office-Home/Art/helmet/00073.jpg
INPUT c:/Users/chris/Documents/Paper/Accepted/2020_ACCV_ASAN/0543-supp/dataset/Office-Home/Art/helmet/00073.jpg
INPUT c:/Users/chris/Documents/Paper/Accepted/2020_ACCV_ASAN/0543-supp/dataset/Office-Home/Art/helmet/00079.jpg
INPUT c:/Users/chris/Documents/Paper/Accepted/2020_ACCV_ASAN/0543-supp/dataset/Office-Home/Art/helmet/00079.jpg
INPUT c:/Users/chris/Documents/Paper/Accepted/2020_ACCV_ASAN/0543-supp/dataset/Office-Home/Art/helmet/00079.jpg
INPUT c:/Users/chris/Documents/Paper/Accepted/2020_ACCV_ASAN/0543-supp/dataset/Office-Home/Art/helmet/00079.jpg
INPUT c:/Users/chris/Documents/Paper/Accepted/2020_ACCV_ASAN/0543-supp/dataset/Office-Home/Art/helmet/00079.jpg
INPUT c:/Users/chris/Documents/Paper/Accepted/2020_ACCV_ASAN/0543-supp/dataset/Office-Home/Real_World/helmet/00010.jpg
INPUT c:/Users/chris/Documents/Paper/Accepted/2020_ACCV_ASAN/0543-supp/dataset/Office-Home/Real_World/helmet/00010.jpg
INPUT c:/Users/chris/Documents/Paper/Accepted/2020_ACCV_ASAN/0543-supp/dataset/Office-Home/Real_World/helmet/00010.jpg
INPUT c:/Users/chris/Documents/Paper/Accepted/2020_ACCV_ASAN/0543-supp/dataset/Office-Home/Real_World/helmet/00010.jpg
INPUT c:/Users/chris/Documents/Paper/Accepted/2020_ACCV_ASAN/0543-supp/dataset/Office-Home/Real_World/helmet/00010.jpg
INPUT c:/Users/chris/Documents/Paper/Accepted/2020_ACCV_ASAN/0543-supp/dataset/Office-Home/Real_World/helmet/00025.jpg
INPUT c:/Users/chris/Documents/Paper/Accepted/2020_ACCV_ASAN/0543-supp/dataset/Office-Home/Real_World/helmet/00025.jpg
INPUT c:/Users/chris/Documents/Paper/Accepted/2020_ACCV_ASAN/0543-supp/dataset/Office-Home/Real_World/helmet/00025.jpg
INPUT c:/Users/chris/Documents/Paper/Accepted/2020_ACCV_ASAN/0543-supp/dataset/Office-Home/Real_World/helmet/00025.jpg
INPUT c:/Users/chris/Documents/Paper/Accepted/2020_ACCV_ASAN/0543-supp/dataset/Office-Home/Real_World/helmet/00025.jpg
INPUT c:/Users/chris/Documents/Paper/Accepted/2020_ACCV_ASAN/0543-supp/dataset/Office-Home/Real_World/helmet/00033.jpg
INPUT c:/Users/chris/Documents/Paper/Accepted/2020_ACCV_ASAN/0543-supp/dataset/Office-Home/Real_World/helmet/00033.jpg
INPUT c:/Users/chris/Documents/Paper/Accepted/2020_ACCV_ASAN/0543-supp/dataset/Office-Home/Real_World/helmet/00033.jpg
INPUT c:/Users/chris/Documents/Paper/Accepted/2020_ACCV_ASAN/0543-supp/dataset/Office-Home/Real_World/helmet/00033.jpg
INPUT c:/Users/chris/Documents/Paper/Accepted/2020_ACCV_ASAN/0543-supp/dataset/Office-Home/Real_World/helmet/00033.jpg
INPUT c:/Users/chris/Documents/Paper/Accepted/2020_ACCV_ASAN/0543-supp/dataset/Office-Home/Product/helmet/00001.jpg
INPUT c:/Users/chris/Documents/Paper/Accepted/2020_ACCV_ASAN/0543-supp/dataset/Office-Home/Product/helmet/00001.jpg
INPUT c:/Users/chris/Documents/Paper/Accepted/2020_ACCV_ASAN/0543-supp/dataset/Office-Home/Product/helmet/00001.jpg
INPUT c:/Users/chris/Documents/Paper/Accepted/2020_ACCV_ASAN/0543-supp/dataset/Office-Home/Product/helmet/00001.jpg
INPUT c:/Users/chris/Documents/Paper/Accepted/2020_ACCV_ASAN/0543-supp/dataset/Office-Home/Product/helmet/00001.jpg
INPUT c:/Users/chris/Documents/Paper/Accepted/2020_ACCV_ASAN/0543-supp/dataset/Office-Home/Product/helmet/00002.jpg
INPUT c:/Users/chris/Documents/Paper/Accepted/2020_ACCV_ASAN/0543-supp/dataset/Office-Home/Product/helmet/00002.jpg
INPUT c:/Users/chris/Documents/Paper/Accepted/2020_ACCV_ASAN/0543-supp/dataset/Office-Home/Product/helmet/00002.jpg
INPUT c:/Users/chris/Documents/Paper/Accepted/2020_ACCV_ASAN/0543-supp/dataset/Office-Home/Product/helmet/00002.jpg
INPUT c:/Users/chris/Documents/Paper/Accepted/2020_ACCV_ASAN/0543-supp/dataset/Office-Home/Product/helmet/00002.jpg
INPUT c:/Users/chris/Documents/Paper/Accepted/2020_ACCV_ASAN/0543-supp/dataset/Office-Home/Product/helmet/00035.jpg
INPUT c:/Users/chris/Documents/Paper/Accepted/2020_ACCV_ASAN/0543-supp/dataset/Office-Home/Product/helmet/00035.jpg
INPUT c:/Users/chris/Documents/Paper/Accepted/2020_ACCV_ASAN/0543-supp/dataset/Office-Home/Product/helmet/00035.jpg
INPUT c:/Users/chris/Documents/Paper/Accepted/2020_ACCV_ASAN/0543-supp/dataset/Office-Home/Product/helmet/00035.jpg
INPUT c:/Users/chris/Documents/Paper/Accepted/2020_ACCV_ASAN/0543-supp/dataset/Office-Home/Product/helmet/00035.jpg
INPUT c:/Users/chris/Documents/Paper/Accepted/2020_ACCV_ASAN/0543-supp/dataset/Office-Home/Art/candles/00064.jpg
INPUT c:/Users/chris/Documents/Paper/Accepted/2020_ACCV_ASAN/0543-supp/dataset/Office-Home/Art/candles/00064.jpg
INPUT c:/Users/chris/Documents/Paper/Accepted/2020_ACCV_ASAN/0543-supp/dataset/Office-Home/Art/candles/00064.jpg
INPUT c:/Users/chris/Documents/Paper/Accepted/2020_ACCV_ASAN/0543-supp/dataset/Office-Home/Art/candles/00064.jpg
INPUT c:/Users/chris/Documents/Paper/Accepted/2020_ACCV_ASAN/0543-supp/dataset/Office-Home/Art/candles/00064.jpg
INPUT c:/Users/chris/Documents/Paper/Accepted/2020_ACCV_ASAN/0543-supp/dataset/Office-Home/Art/candles/00065.jpg
INPUT c:/Users/chris/Documents/Paper/Accepted/2020_ACCV_ASAN/0543-supp/dataset/Office-Home/Art/candles/00065.jpg
INPUT c:/Users/chris/Documents/Paper/Accepted/2020_ACCV_ASAN/0543-supp/dataset/Office-Home/Art/candles/00065.jpg
INPUT c:/Users/chris/Documents/Paper/Accepted/2020_ACCV_ASAN/0543-supp/dataset/Office-Home/Art/candles/00065.jpg
INPUT c:/Users/chris/Documents/Paper/Accepted/2020_ACCV_ASAN/0543-supp/dataset/Office-Home/Art/candles/00065.jpg
INPUT c:/Users/chris/Documents/Paper/Accepted/2020_ACCV_ASAN/0543-supp/dataset/Office-Home/Art/candles/00068.jpg
INPUT c:/Users/chris/Documents/Paper/Accepted/2020_ACCV_ASAN/0543-supp/dataset/Office-Home/Art/candles/00068.jpg
INPUT c:/Users/chris/Documents/Paper/Accepted/2020_ACCV_ASAN/0543-supp/dataset/Office-Home/Art/candles/00068.jpg
INPUT c:/Users/chris/Documents/Paper/Accepted/2020_ACCV_ASAN/0543-supp/dataset/Office-Home/Art/candles/00068.jpg
INPUT c:/Users/chris/Documents/Paper/Accepted/2020_ACCV_ASAN/0543-supp/dataset/Office-Home/Art/candles/00068.jpg
INPUT c:/Users/chris/Documents/Paper/Accepted/2020_ACCV_ASAN/0543-supp/dataset/Office-Home/Real_World/candles/00068.jpg
INPUT c:/Users/chris/Documents/Paper/Accepted/2020_ACCV_ASAN/0543-supp/dataset/Office-Home/Real_World/candles/00068.jpg
INPUT c:/Users/chris/Documents/Paper/Accepted/2020_ACCV_ASAN/0543-supp/dataset/Office-Home/Real_World/candles/00068.jpg
INPUT c:/Users/chris/Documents/Paper/Accepted/2020_ACCV_ASAN/0543-supp/dataset/Office-Home/Real_World/candles/00068.jpg
INPUT c:/Users/chris/Documents/Paper/Accepted/2020_ACCV_ASAN/0543-supp/dataset/Office-Home/Real_World/candles/00068.jpg
INPUT c:/Users/chris/Documents/Paper/Accepted/2020_ACCV_ASAN/0543-supp/dataset/Office-Home/Real_World/candles/00074.jpg
INPUT c:/Users/chris/Documents/Paper/Accepted/2020_ACCV_ASAN/0543-supp/dataset/Office-Home/Real_World/candles/00074.jpg
INPUT c:/Users/chris/Documents/Paper/Accepted/2020_ACCV_ASAN/0543-supp/dataset/Office-Home/Real_World/candles/00074.jpg
INPUT c:/Users/chris/Documents/Paper/Accepted/2020_ACCV_ASAN/0543-supp/dataset/Office-Home/Real_World/candles/00074.jpg
INPUT c:/Users/chris/Documents/Paper/Accepted/2020_ACCV_ASAN/0543-supp/dataset/Office-Home/Real_World/candles/00074.jpg
INPUT c:/Users/chris/Documents/Paper/Accepted/2020_ACCV_ASAN/0543-supp/dataset/Office-Home/Real_World/candles/00097.jpg
INPUT c:/Users/chris/Documents/Paper/Accepted/2020_ACCV_ASAN/0543-supp/dataset/Office-Home/Real_World/candles/00097.jpg
INPUT c:/Users/chris/Documents/Paper/Accepted/2020_ACCV_ASAN/0543-supp/dataset/Office-Home/Real_World/candles/00097.jpg
INPUT c:/Users/chris/Documents/Paper/Accepted/2020_ACCV_ASAN/0543-supp/dataset/Office-Home/Real_World/candles/00097.jpg
INPUT c:/Users/chris/Documents/Paper/Accepted/2020_ACCV_ASAN/0543-supp/dataset/Office-Home/Real_World/candles/00097.jpg
INPUT c:/Users/chris/Documents/Paper/Accepted/2020_ACCV_ASAN/0543-supp/dataset/Office-Home/Product/candles/00001.jpg
INPUT c:/Users/chris/Documents/Paper/Accepted/2020_ACCV_ASAN/0543-supp/dataset/Office-Home/Product/candles/00001.jpg
INPUT c:/Users/chris/Documents/Paper/Accepted/2020_ACCV_ASAN/0543-supp/dataset/Office-Home/Product/candles/00001.jpg
INPUT c:/Users/chris/Documents/Paper/Accepted/2020_ACCV_ASAN/0543-supp/dataset/Office-Home/Product/candles/00001.jpg
INPUT c:/Users/chris/Documents/Paper/Accepted/2020_ACCV_ASAN/0543-supp/dataset/Office-Home/Product/candles/00001.jpg
INPUT c:/Users/chris/Documents/Paper/Accepted/2020_ACCV_ASAN/0543-supp/dataset/Office-Home/Product/candles/00002.jpg
INPUT c:/Users/chris/Documents/Paper/Accepted/2020_ACCV_ASAN/0543-supp/dataset/Office-Home/Product/candles/00002.jpg
INPUT c:/Users/chris/Documents/Paper/Accepted/2020_ACCV_ASAN/0543-supp/dataset/Office-Home/Product/candles/00002.jpg
INPUT c:/Users/chris/Documents/Paper/Accepted/2020_ACCV_ASAN/0543-supp/dataset/Office-Home/Product/candles/00002.jpg
INPUT c:/Users/chris/Documents/Paper/Accepted/2020_ACCV_ASAN/0543-supp/dataset/Office-Home/Product/candles/00002.jpg
INPUT c:/Users/chris/Documents/Paper/Accepted/2020_ACCV_ASAN/0543-supp/dataset/Office-Home/Product/candles/00053.jpg
INPUT c:/Users/chris/Documents/Paper/Accepted/2020_ACCV_ASAN/0543-supp/dataset/Office-Home/Product/candles/00053.jpg
INPUT c:/Users/chris/Documents/Paper/Accepted/2020_ACCV_ASAN/0543-supp/dataset/Office-Home/Product/candles/00053.jpg
INPUT c:/Users/chris/Documents/Paper/Accepted/2020_ACCV_ASAN/0543-supp/dataset/Office-Home/Product/candles/00053.jpg
INPUT c:/Users/chris/Documents/Paper/Accepted/2020_ACCV_ASAN/0543-supp/dataset/Office-Home/Product/candles/00053.jpg
INPUT c:/Users/chris/Documents/Paper/Accepted/2020_ACCV_ASAN/0543-supp/dataset/visda/synthetic/aeroplane/src_1_02691156_1b0b1d2cb9f9d5c0575bd26acccafabd__10_236_150.png
INPUT c:/Users/chris/Documents/Paper/Accepted/2020_ACCV_ASAN/0543-supp/dataset/visda/synthetic/aeroplane/src_1_02691156_1b0b1d2cb9f9d5c0575bd26acccafabd__10_236_150.png
INPUT c:/Users/chris/Documents/Paper/Accepted/2020_ACCV_ASAN/0543-supp/dataset/visda/synthetic/aeroplane/src_1_02691156_1b0b1d2cb9f9d5c0575bd26acccafabd__10_236_150.png
INPUT c:/Users/chris/Documents/Paper/Accepted/2020_ACCV_ASAN/0543-supp/dataset/visda/synthetic/aeroplane/src_1_02691156_1b0b1d2cb9f9d5c0575bd26acccafabd__10_236_150.png
INPUT c:/Users/chris/Documents/Paper/Accepted/2020_ACCV_ASAN/0543-supp/dataset/visda/synthetic/aeroplane/src_1_02691156_1b0b1d2cb9f9d5c0575bd26acccafabd__10_236_150.png
INPUT c:/Users/chris/Documents/Paper/Accepted/2020_ACCV_ASAN/0543-supp/dataset/visda/synthetic/aeroplane/src_1_02691156_1b0b1d2cb9f9d5c0575bd26acccafabd__44_236_150.png
INPUT c:/Users/chris/Documents/Paper/Accepted/2020_ACCV_ASAN/0543-supp/dataset/visda/synthetic/aeroplane/src_1_02691156_1b0b1d2cb9f9d5c0575bd26acccafabd__44_236_150.png
INPUT c:/Users/chris/Documents/Paper/Accepted/2020_ACCV_ASAN/0543-supp/dataset/visda/synthetic/aeroplane/src_1_02691156_1b0b1d2cb9f9d5c0575bd26acccafabd__44_236_150.png
INPUT c:/Users/chris/Documents/Paper/Accepted/2020_ACCV_ASAN/0543-supp/dataset/visda/synthetic/aeroplane/src_1_02691156_1b0b1d2cb9f9d5c0575bd26acccafabd__44_236_150.png
INPUT c:/Users/chris/Documents/Paper/Accepted/2020_ACCV_ASAN/0543-supp/dataset/visda/synthetic/aeroplane/src_1_02691156_1b0b1d2cb9f9d5c0575bd26acccafabd__44_236_150.png
INPUT c:/Users/chris/Documents/Paper/Accepted/2020_ACCV_ASAN/0543-supp/dataset/visda/synthetic/aeroplane/src_1_02691156_1b0b1d2cb9f9d5c0575bd26acccafabd__78_349_150.png
INPUT c:/Users/chris/Documents/Paper/Accepted/2020_ACCV_ASAN/0543-supp/dataset/visda/synthetic/aeroplane/src_1_02691156_1b0b1d2cb9f9d5c0575bd26acccafabd__78_349_150.png
INPUT c:/Users/chris/Documents/Paper/Accepted/2020_ACCV_ASAN/0543-supp/dataset/visda/synthetic/aeroplane/src_1_02691156_1b0b1d2cb9f9d5c0575bd26acccafabd__78_349_150.png
INPUT c:/Users/chris/Documents/Paper/Accepted/2020_ACCV_ASAN/0543-supp/dataset/visda/synthetic/aeroplane/src_1_02691156_1b0b1d2cb9f9d5c0575bd26acccafabd__78_349_150.png
INPUT c:/Users/chris/Documents/Paper/Accepted/2020_ACCV_ASAN/0543-supp/dataset/visda/synthetic/aeroplane/src_1_02691156_1b0b1d2cb9f9d5c0575bd26acccafabd__78_349_150.png
INPUT c:/Users/chris/Documents/Paper/Accepted/2020_ACCV_ASAN/0543-supp/dataset/visda/real/aeroplane/aeroplane_156302.jpg
INPUT c:/Users/chris/Documents/Paper/Accepted/2020_ACCV_ASAN/0543-supp/dataset/visda/real/aeroplane/aeroplane_156302.jpg
INPUT c:/Users/chris/Documents/Paper/Accepted/2020_ACCV_ASAN/0543-supp/dataset/visda/real/aeroplane/aeroplane_156302.jpg
INPUT c:/Users/chris/Documents/Paper/Accepted/2020_ACCV_ASAN/0543-supp/dataset/visda/real/aeroplane/aeroplane_156302.jpg
INPUT c:/Users/chris/Documents/Paper/Accepted/2020_ACCV_ASAN/0543-supp/dataset/visda/real/aeroplane/aeroplane_156302.jpg
INPUT c:/Users/chris/Documents/Paper/Accepted/2020_ACCV_ASAN/0543-supp/dataset/visda/real/aeroplane/aeroplane_156317.jpg
INPUT c:/Users/chris/Documents/Paper/Accepted/2020_ACCV_ASAN/0543-supp/dataset/visda/real/aeroplane/aeroplane_156317.jpg
INPUT c:/Users/chris/Documents/Paper/Accepted/2020_ACCV_ASAN/0543-supp/dataset/visda/real/aeroplane/aeroplane_156317.jpg
INPUT c:/Users/chris/Documents/Paper/Accepted/2020_ACCV_ASAN/0543-supp/dataset/visda/real/aeroplane/aeroplane_156317.jpg
INPUT c:/Users/chris/Documents/Paper/Accepted/2020_ACCV_ASAN/0543-supp/dataset/visda/real/aeroplane/aeroplane_156317.jpg
INPUT c:/Users/chris/Documents/Paper/Accepted/2020_ACCV_ASAN/0543-supp/dataset/visda/real/aeroplane/aeroplane_156332.jpg
INPUT c:/Users/chris/Documents/Paper/Accepted/2020_ACCV_ASAN/0543-supp/dataset/visda/real/aeroplane/aeroplane_156332.jpg
INPUT c:/Users/chris/Documents/Paper/Accepted/2020_ACCV_ASAN/0543-supp/dataset/visda/real/aeroplane/aeroplane_156332.jpg
INPUT c:/Users/chris/Documents/Paper/Accepted/2020_ACCV_ASAN/0543-supp/dataset/visda/real/aeroplane/aeroplane_156332.jpg
INPUT c:/Users/chris/Documents/Paper/Accepted/2020_ACCV_ASAN/0543-supp/dataset/visda/real/aeroplane/aeroplane_156332.jpg
INPUT c:/Users/chris/Documents/Paper/Accepted/2020_ACCV_ASAN/0543-supp/dataset/visda/synthetic/car/src_1_02958343_1abeca7159db7ed9f200a72c9245aee7__10_349_150.png
INPUT c:/Users/chris/Documents/Paper/Accepted/2020_ACCV_ASAN/0543-supp/dataset/visda/synthetic/car/src_1_02958343_1abeca7159db7ed9f200a72c9245aee7__10_349_150.png
INPUT c:/Users/chris/Documents/Paper/Accepted/2020_ACCV_ASAN/0543-supp/dataset/visda/synthetic/car/src_1_02958343_1abeca7159db7ed9f200a72c9245aee7__10_349_150.png
INPUT c:/Users/chris/Documents/Paper/Accepted/2020_ACCV_ASAN/0543-supp/dataset/visda/synthetic/car/src_1_02958343_1abeca7159db7ed9f200a72c9245aee7__10_349_150.png
INPUT c:/Users/chris/Documents/Paper/Accepted/2020_ACCV_ASAN/0543-supp/dataset/visda/synthetic/car/src_1_02958343_1abeca7159db7ed9f200a72c9245aee7__10_349_150.png
INPUT c:/Users/chris/Documents/Paper/Accepted/2020_ACCV_ASAN/0543-supp/dataset/visda/synthetic/car/src_1_02958343_1abeca7159db7ed9f200a72c9245aee7__44_10_150.png
INPUT c:/Users/chris/Documents/Paper/Accepted/2020_ACCV_ASAN/0543-supp/dataset/visda/synthetic/car/src_1_02958343_1abeca7159db7ed9f200a72c9245aee7__44_10_150.png
INPUT c:/Users/chris/Documents/Paper/Accepted/2020_ACCV_ASAN/0543-supp/dataset/visda/synthetic/car/src_1_02958343_1abeca7159db7ed9f200a72c9245aee7__44_10_150.png
INPUT c:/Users/chris/Documents/Paper/Accepted/2020_ACCV_ASAN/0543-supp/dataset/visda/synthetic/car/src_1_02958343_1abeca7159db7ed9f200a72c9245aee7__44_10_150.png
INPUT c:/Users/chris/Documents/Paper/Accepted/2020_ACCV_ASAN/0543-supp/dataset/visda/synthetic/car/src_1_02958343_1abeca7159db7ed9f200a72c9245aee7__44_10_150.png
INPUT c:/Users/chris/Documents/Paper/Accepted/2020_ACCV_ASAN/0543-supp/dataset/visda/synthetic/car/src_1_02958343_1abeca7159db7ed9f200a72c9245aee7__61_123_165.png
INPUT c:/Users/chris/Documents/Paper/Accepted/2020_ACCV_ASAN/0543-supp/dataset/visda/synthetic/car/src_1_02958343_1abeca7159db7ed9f200a72c9245aee7__61_123_165.png
INPUT c:/Users/chris/Documents/Paper/Accepted/2020_ACCV_ASAN/0543-supp/dataset/visda/synthetic/car/src_1_02958343_1abeca7159db7ed9f200a72c9245aee7__61_123_165.png
INPUT c:/Users/chris/Documents/Paper/Accepted/2020_ACCV_ASAN/0543-supp/dataset/visda/synthetic/car/src_1_02958343_1abeca7159db7ed9f200a72c9245aee7__61_123_165.png
INPUT c:/Users/chris/Documents/Paper/Accepted/2020_ACCV_ASAN/0543-supp/dataset/visda/synthetic/car/src_1_02958343_1abeca7159db7ed9f200a72c9245aee7__61_123_165.png
INPUT c:/Users/chris/Documents/Paper/Accepted/2020_ACCV_ASAN/0543-supp/dataset/visda/real/car/car_131741.jpg
INPUT c:/Users/chris/Documents/Paper/Accepted/2020_ACCV_ASAN/0543-supp/dataset/visda/real/car/car_131741.jpg
INPUT c:/Users/chris/Documents/Paper/Accepted/2020_ACCV_ASAN/0543-supp/dataset/visda/real/car/car_131741.jpg
INPUT c:/Users/chris/Documents/Paper/Accepted/2020_ACCV_ASAN/0543-supp/dataset/visda/real/car/car_131741.jpg
INPUT c:/Users/chris/Documents/Paper/Accepted/2020_ACCV_ASAN/0543-supp/dataset/visda/real/car/car_131741.jpg
INPUT c:/Users/chris/Documents/Paper/Accepted/2020_ACCV_ASAN/0543-supp/dataset/visda/real/car/car_131760.jpg
INPUT c:/Users/chris/Documents/Paper/Accepted/2020_ACCV_ASAN/0543-supp/dataset/visda/real/car/car_131760.jpg
INPUT c:/Users/chris/Documents/Paper/Accepted/2020_ACCV_ASAN/0543-supp/dataset/visda/real/car/car_131760.jpg
INPUT c:/Users/chris/Documents/Paper/Accepted/2020_ACCV_ASAN/0543-supp/dataset/visda/real/car/car_131760.jpg
INPUT c:/Users/chris/Documents/Paper/Accepted/2020_ACCV_ASAN/0543-supp/dataset/visda/real/car/car_131760.jpg
INPUT c:/Users/chris/Documents/Paper/Accepted/2020_ACCV_ASAN/0543-supp/dataset/visda/real/car/car_131776.jpg
INPUT c:/Users/chris/Documents/Paper/Accepted/2020_ACCV_ASAN/0543-supp/dataset/visda/real/car/car_131776.jpg
INPUT c:/Users/chris/Documents/Paper/Accepted/2020_ACCV_ASAN/0543-supp/dataset/visda/real/car/car_131776.jpg
INPUT c:/Users/chris/Documents/Paper/Accepted/2020_ACCV_ASAN/0543-supp/dataset/visda/real/car/car_131776.jpg
INPUT c:/Users/chris/Documents/Paper/Accepted/2020_ACCV_ASAN/0543-supp/dataset/visda/real/car/car_131776.jpg
INPUT c:/Users/chris/Documents/Paper/Accepted/2020_ACCV_ASAN/0543-supp/dataset/visda/synthetic/horse/src_3_1511__27_123_165.png
INPUT c:/Users/chris/Documents/Paper/Accepted/2020_ACCV_ASAN/0543-supp/dataset/visda/synthetic/horse/src_3_1511__27_123_165.png
INPUT c:/Users/chris/Documents/Paper/Accepted/2020_ACCV_ASAN/0543-supp/dataset/visda/synthetic/horse/src_3_1511__27_123_165.png
INPUT c:/Users/chris/Documents/Paper/Accepted/2020_ACCV_ASAN/0543-supp/dataset/visda/synthetic/horse/src_3_1511__27_123_165.png
INPUT c:/Users/chris/Documents/Paper/Accepted/2020_ACCV_ASAN/0543-supp/dataset/visda/synthetic/horse/src_3_1511__27_123_165.png
INPUT c:/Users/chris/Documents/Paper/Accepted/2020_ACCV_ASAN/0543-supp/dataset/visda/synthetic/horse/src_3_1511__44_236_150.png
INPUT c:/Users/chris/Documents/Paper/Accepted/2020_ACCV_ASAN/0543-supp/dataset/visda/synthetic/horse/src_3_1511__44_236_150.png
INPUT c:/Users/chris/Documents/Paper/Accepted/2020_ACCV_ASAN/0543-supp/dataset/visda/synthetic/horse/src_3_1511__44_236_150.png
INPUT c:/Users/chris/Documents/Paper/Accepted/2020_ACCV_ASAN/0543-supp/dataset/visda/synthetic/horse/src_3_1511__44_236_150.png
INPUT c:/Users/chris/Documents/Paper/Accepted/2020_ACCV_ASAN/0543-supp/dataset/visda/synthetic/horse/src_3_1511__44_236_150.png
INPUT c:/Users/chris/Documents/Paper/Accepted/2020_ACCV_ASAN/0543-supp/dataset/visda/synthetic/horse/src_3_1511__78_236_150.png
INPUT c:/Users/chris/Documents/Paper/Accepted/2020_ACCV_ASAN/0543-supp/dataset/visda/synthetic/horse/src_3_1511__78_236_150.png
INPUT c:/Users/chris/Documents/Paper/Accepted/2020_ACCV_ASAN/0543-supp/dataset/visda/synthetic/horse/src_3_1511__78_236_150.png
INPUT c:/Users/chris/Documents/Paper/Accepted/2020_ACCV_ASAN/0543-supp/dataset/visda/synthetic/horse/src_3_1511__78_236_150.png
INPUT c:/Users/chris/Documents/Paper/Accepted/2020_ACCV_ASAN/0543-supp/dataset/visda/synthetic/horse/src_3_1511__78_236_150.png
INPUT c:/Users/chris/Documents/Paper/Accepted/2020_ACCV_ASAN/0543-supp/dataset/visda/real/horse/horse_53418.jpg
INPUT c:/Users/chris/Documents/Paper/Accepted/2020_ACCV_ASAN/0543-supp/dataset/visda/real/horse/horse_53418.jpg
INPUT c:/Users/chris/Documents/Paper/Accepted/2020_ACCV_ASAN/0543-supp/dataset/visda/real/horse/horse_53418.jpg
INPUT c:/Users/chris/Documents/Paper/Accepted/2020_ACCV_ASAN/0543-supp/dataset/visda/real/horse/horse_53418.jpg
INPUT c:/Users/chris/Documents/Paper/Accepted/2020_ACCV_ASAN/0543-supp/dataset/visda/real/horse/horse_53418.jpg
INPUT c:/Users/chris/Documents/Paper/Accepted/2020_ACCV_ASAN/0543-supp/dataset/visda/real/horse/horse_53430.jpg
INPUT c:/Users/chris/Documents/Paper/Accepted/2020_ACCV_ASAN/0543-supp/dataset/visda/real/horse/horse_53430.jpg
INPUT c:/Users/chris/Documents/Paper/Accepted/2020_ACCV_ASAN/0543-supp/dataset/visda/real/horse/horse_53430.jpg
INPUT c:/Users/chris/Documents/Paper/Accepted/2020_ACCV_ASAN/0543-supp/dataset/visda/real/horse/horse_53430.jpg
INPUT c:/Users/chris/Documents/Paper/Accepted/2020_ACCV_ASAN/0543-supp/dataset/visda/real/horse/horse_53430.jpg
INPUT c:/Users/chris/Documents/Paper/Accepted/2020_ACCV_ASAN/0543-supp/dataset/visda/real/horse/horse_53455.jpg
INPUT c:/Users/chris/Documents/Paper/Accepted/2020_ACCV_ASAN/0543-supp/dataset/visda/real/horse/horse_53455.jpg
INPUT c:/Users/chris/Documents/Paper/Accepted/2020_ACCV_ASAN/0543-supp/dataset/visda/real/horse/horse_53455.jpg
INPUT c:/Users/chris/Documents/Paper/Accepted/2020_ACCV_ASAN/0543-supp/dataset/visda/real/horse/horse_53455.jpg
INPUT c:/Users/chris/Documents/Paper/Accepted/2020_ACCV_ASAN/0543-supp/dataset/visda/real/horse/horse_53455.jpg
INPUT c:/Users/chris/Documents/Paper/Accepted/2020_ACCV_ASAN/0543-supp/543-supp.bbl
INPUT c:/Users/chris/Documents/Paper/Accepted/2020_ACCV_ASAN/0543-supp/543-supp.bbl
INPUT c:/Users/chris/Documents/Paper/Accepted/2020_ACCV_ASAN/0543-supp/543-supp.aux
INPUT C:/Users/chris/AppData/Local/Programs/MiKTeX 2.9/fonts/type1/public/amsfonts/cm/cmbx10.pfb
INPUT C:/Users/chris/AppData/Local/Programs/MiKTeX 2.9/fonts/type1/public/amsfonts/cm/cmbx10.pfb
INPUT C:/Users/chris/AppData/Local/Programs/MiKTeX 2.9/fonts/type1/public/amsfonts/cm/cmbx12.pfb
INPUT C:/Users/chris/AppData/Local/Programs/MiKTeX 2.9/fonts/type1/public/amsfonts/cm/cmbx12.pfb
INPUT C:/Users/chris/AppData/Local/Programs/MiKTeX 2.9/fonts/type1/public/amsfonts/cm/cmbx9.pfb
INPUT C:/Users/chris/AppData/Local/Programs/MiKTeX 2.9/fonts/type1/public/amsfonts/cm/cmbx9.pfb
INPUT C:/Users/chris/AppData/Local/Programs/MiKTeX 2.9/fonts/type1/public/amsfonts/cm/cmmi10.pfb
INPUT C:/Users/chris/AppData/Local/Programs/MiKTeX 2.9/fonts/type1/public/amsfonts/cm/cmmi10.pfb
INPUT C:/Users/chris/AppData/Local/Programs/MiKTeX 2.9/fonts/type1/public/amsfonts/cm/cmmi6.pfb
INPUT C:/Users/chris/AppData/Local/Programs/MiKTeX 2.9/fonts/type1/public/amsfonts/cm/cmmi6.pfb
INPUT C:/Users/chris/AppData/Local/Programs/MiKTeX 2.9/fonts/type1/public/amsfonts/cm/cmmi7.pfb
INPUT C:/Users/chris/AppData/Local/Programs/MiKTeX 2.9/fonts/type1/public/amsfonts/cm/cmmi7.pfb
INPUT C:/Users/chris/AppData/Local/Programs/MiKTeX 2.9/fonts/type1/public/amsfonts/cm/cmr10.pfb
INPUT C:/Users/chris/AppData/Local/Programs/MiKTeX 2.9/fonts/type1/public/amsfonts/cm/cmr10.pfb
INPUT C:/Users/chris/AppData/Local/Programs/MiKTeX 2.9/fonts/type1/public/amsfonts/cm/cmr7.pfb
INPUT C:/Users/chris/AppData/Local/Programs/MiKTeX 2.9/fonts/type1/public/amsfonts/cm/cmr7.pfb
INPUT C:/Users/chris/AppData/Local/Programs/MiKTeX 2.9/fonts/type1/public/amsfonts/cm/cmr9.pfb
INPUT C:/Users/chris/AppData/Local/Programs/MiKTeX 2.9/fonts/type1/public/amsfonts/cm/cmr9.pfb
INPUT C:/Users/chris/AppData/Local/Programs/MiKTeX 2.9/fonts/type1/public/amsfonts/cm/cmsy10.pfb
INPUT C:/Users/chris/AppData/Local/Programs/MiKTeX 2.9/fonts/type1/public/amsfonts/cm/cmsy10.pfb
INPUT C:/Users/chris/AppData/Local/Programs/MiKTeX 2.9/fonts/type1/public/amsfonts/cm/cmsy7.pfb
INPUT C:/Users/chris/AppData/Local/Programs/MiKTeX 2.9/fonts/type1/public/amsfonts/cm/cmsy7.pfb
INPUT C:/Users/chris/AppData/Local/Programs/MiKTeX 2.9/fonts/type1/public/amsfonts/cm/cmsy9.pfb
INPUT C:/Users/chris/AppData/Local/Programs/MiKTeX 2.9/fonts/type1/public/amsfonts/cm/cmsy9.pfb
INPUT C:/Users/chris/AppData/Local/Programs/MiKTeX 2.9/fonts/type1/public/amsfonts/cm/cmti10.pfb
INPUT C:/Users/chris/AppData/Local/Programs/MiKTeX 2.9/fonts/type1/public/amsfonts/cm/cmti10.pfb
INPUT C:/Users/chris/AppData/Local/Programs/MiKTeX 2.9/fonts/type1/public/amsfonts/cm/cmtt9.pfb
INPUT C:/Users/chris/AppData/Local/Programs/MiKTeX 2.9/fonts/type1/public/amsfonts/cm/cmtt9.pfb
