# Supplementary material
Source: ML conference proceedings conference paper supplement (https://openaccess.thecvf.com/content/ACCV2020/html/Raab_Bridging_Adversarial_and_ACCV_2020_paper.html)
Supplement: Supplementary file 10 [file Raab_Bridging_Adversarial_and_ACCV_2020_supplemental.zip › 543-supp.log]

This is pdfTeX, Version 3.14159265-2.6-1.40.19 (MiKTeX 2.9.6630 64-bit) (preloaded format=pdflatex 2018.6.4)  1 OCT 2020 09:43
entering extended mode
**c:/Users/chris/Documents/Paper/Accepted/2020_ACCV_ASAN/0543-supp/543-supp.tex
(c:/Users/chris/Documents/Paper/Accepted/2020_ACCV_ASAN/0543-supp/543-supp.tex
LaTeX2e <2017-04-15>
Babel <3.18> and hyphenation patterns for 75 language(s) loaded.
(c:/Users\chris\Documents\Paper\Accepted\2020_ACCV_ASAN\0543-supp\llncs.cls
Document Class: llncs 2018/03/10 v2.20 
 LaTeX document class for Lecture Notes in Computer Science
("C:\Users\chris\AppData\Local\Programs\MiKTeX 2.9\tex\latex\base\article.cls"
Document Class: article 2014/09/29 v1.4h Standard LaTeX document class
("C:\Users\chris\AppData\Local\Programs\MiKTeX 2.9\tex\latex\base\size10.clo"
File: size10.clo 2014/09/29 v1.4h Standard LaTeX file (size option)
)
\c@part=\count79
\c@section=\count80
\c@subsection=\count81
\c@subsubsection=\count82
\c@paragraph=\count83
\c@subparagraph=\count84
\c@figure=\count85
\c@table=\count86
\abovecaptionskip=\skip41
\belowcaptionskip=\skip42
\bibindent=\dimen102
) ("C:\Users\chris\AppData\Local\Programs\MiKTeX 2.9\tex\latex\tools\multicol.sty"
Package: multicol 2017/04/11 v1.8q multicolumn formatting (FMi)
\c@tracingmulticols=\count87
\mult@box=\box26
\multicol@leftmargin=\dimen103
\c@unbalance=\count88
\c@collectmore=\count89
\doublecol@number=\count90
\multicoltolerance=\count91
\multicolpretolerance=\count92
\full@width=\dimen104
\page@free=\dimen105
\premulticols=\dimen106
\postmulticols=\dimen107
\multicolsep=\skip43
\multicolbaselineskip=\skip44
\partial@page=\box27
\last@line=\box28
\maxbalancingoverflow=\dimen108
\mult@rightbox=\box29
\mult@grightbox=\box30
\mult@gfirstbox=\box31
\mult@firstbox=\box32
\@tempa=\box33
\@tempa=\box34
\@tempa=\box35
\@tempa=\box36
\@tempa=\box37
\@tempa=\box38
\@tempa=\box39
\@tempa=\box40
\@tempa=\box41
\@tempa=\box42
\@tempa=\box43
\@tempa=\box44
\@tempa=\box45
\@tempa=\box46
\@tempa=\box47
\@tempa=\box48
\@tempa=\box49
\c@columnbadness=\count93
\c@finalcolumnbadness=\count94
\last@try=\dimen109
\multicolovershoot=\dimen110
\multicolundershoot=\dimen111
\mult@nat@firstbox=\box50
\colbreak@box=\box51
\mc@col@check@num=\count95
) ("C:\Users\chris\AppData\Local\Programs\MiKTeX 2.9\tex\latex\oberdiek\aliascnt.sty"
Package: aliascnt 2016/05/16 v1.4 Alias counters (HO)
 ("C:\Users\chris\AppData\Local\Programs\MiKTeX 2.9\tex\latex\carlisle\remreset.sty"))
\c@chapter=\count96
LaTeX Font Info:    Redeclaring math symbol \Gamma on input line 362.
LaTeX Font Info:    Redeclaring math symbol \Delta on input line 363.
LaTeX Font Info:    Redeclaring math symbol \Theta on input line 364.
LaTeX Font Info:    Redeclaring math symbol \Lambda on input line 365.
LaTeX Font Info:    Redeclaring math symbol \Xi on input line 366.
LaTeX Font Info:    Redeclaring math symbol \Pi on input line 367.
LaTeX Font Info:    Redeclaring math symbol \Sigma on input line 368.
LaTeX Font Info:    Redeclaring math symbol \Upsilon on input line 369.
LaTeX Font Info:    Redeclaring math symbol \Phi on input line 370.
LaTeX Font Info:    Redeclaring math symbol \Psi on input line 371.
LaTeX Font Info:    Redeclaring math symbol \Omega on input line 372.
\tocchpnum=\dimen112
\tocsecnum=\dimen113
\tocsectotal=\dimen114
\tocsubsecnum=\dimen115
\tocsubsectotal=\dimen116
\tocsubsubsecnum=\dimen117
\tocsubsubsectotal=\dimen118
\tocparanum=\dimen119
\tocparatotal=\dimen120
\tocsubparanum=\dimen121
\@tempcntc=\count97
\fnindent=\dimen122
\c@@inst=\count98
\c@@auth=\count99
\c@auco=\count100
\instindent=\dimen123
\authrun=\box52
\authorrunning=\toks14
\tocauthor=\toks15
\titrun=\box53
\titlerunning=\toks16
\toctitle=\toks17
\c@theorem=\count101
\c@case=\count102
\c@conjecture=\count103
\c@corollary=\count104
\c@definition=\count105
\c@example=\count106
\c@exercise=\count107
\c@lemma=\count108
\c@note=\count109
\c@problem=\count110
\c@property=\count111
\c@proposition=\count112
\c@question=\count113
\c@solution=\count114
\c@remark=\count115
\headlineindent=\dimen124
) ("C:\Users\chris\AppData\Local\Programs\MiKTeX 2.9\tex\latex\graphics\graphicx.sty"
Package: graphicx 2017/06/01 v1.1a Enhanced LaTeX Graphics (DPC,SPQR)
 ("C:\Users\chris\AppData\Local\Programs\MiKTeX 2.9\tex\latex\graphics\keyval.sty"
Package: keyval 2014/10/28 v1.15 key=value parser (DPC)
\KV@toks@=\toks18
) ("C:\Users\chris\AppData\Local\Programs\MiKTeX 2.9\tex\latex\graphics\graphics.sty"
Package: graphics 2017/06/25 v1.2c Standard LaTeX Graphics (DPC,SPQR)
 ("C:\Users\chris\AppData\Local\Programs\MiKTeX 2.9\tex\latex\graphics\trig.sty"
Package: trig 2016/01/03 v1.10 sin cos tan (DPC)
) ("C:\Users\chris\AppData\Local\Programs\MiKTeX 2.9\tex\latex\graphics-cfg\graphics.cfg"
File: graphics.cfg 2016/06/04 v1.11 sample graphics configuration
)
Package graphics Info: Driver file: pdftex.def on input line 99.
 ("C:\Users\chris\AppData\Local\Programs\MiKTeX 2.9\tex\latex\graphics-def\pdftex.def"
File: pdftex.def 2018/01/08 v1.0l Graphics/color driver for pdftex
))
\Gin@req@height=\dimen125
\Gin@req@width=\dimen126
) ("C:\Users\chris\AppData\Local\Programs\MiKTeX 2.9\tex\latex\amsmath\amsmath.sty"
Package: amsmath 2017/09/02 v2.17a AMS math features
\@mathmargin=\skip45

For additional information on amsmath, use the `?' option.
("C:\Users\chris\AppData\Local\Programs\MiKTeX 2.9\tex\latex\amsmath\amstext.sty"
Package: amstext 2000/06/29 v2.01 AMS text
 ("C:\Users\chris\AppData\Local\Programs\MiKTeX 2.9\tex\latex\amsmath\amsgen.sty"
File: amsgen.sty 1999/11/30 v2.0 generic functions
\@emptytoks=\toks19
\ex@=\dimen127
)) ("C:\Users\chris\AppData\Local\Programs\MiKTeX 2.9\tex\latex\amsmath\amsbsy.sty"
Package: amsbsy 1999/11/29 v1.2d Bold Symbols
\pmbraise@=\dimen128
) ("C:\Users\chris\AppData\Local\Programs\MiKTeX 2.9\tex\latex\amsmath\amsopn.sty"
Package: amsopn 2016/03/08 v2.02 operator names
)
\inf@bad=\count116
LaTeX Info: Redefining \frac on input line 213.
\uproot@=\count117
\leftroot@=\count118
LaTeX Info: Redefining \overline on input line 375.
\classnum@=\count119
\DOTSCASE@=\count120
LaTeX Info: Redefining \ldots on input line 472.
LaTeX Info: Redefining \dots on input line 475.
LaTeX Info: Redefining \cdots on input line 596.
\Mathstrutbox@=\box54
\strutbox@=\box55
\big@size=\dimen129
LaTeX Font Info:    Redeclaring font encoding OML on input line 712.
LaTeX Font Info:    Redeclaring font encoding OMS on input line 713.


Package amsmath Warning: Unable to redefine math accent \vec.

\macc@depth=\count121
\c@MaxMatrixCols=\count122
\dotsspace@=\muskip10
\c@parentequation=\count123
\dspbrk@lvl=\count124
\tag@help=\toks20
\row@=\count125
\column@=\count126
\maxfields@=\count127
\andhelp@=\toks21
\eqnshift@=\dimen130
\alignsep@=\dimen131
\tagshift@=\dimen132
\tagwidth@=\dimen133
\totwidth@=\dimen134
\lineht@=\dimen135
\@envbody=\toks22
\multlinegap=\skip46
\multlinetaggap=\skip47
\mathdisplay@stack=\toks23
LaTeX Info: Redefining \[ on input line 2817.
LaTeX Info: Redefining \] on input line 2818.
) ("C:\Users\chris\AppData\Local\Programs\MiKTeX 2.9\tex\latex\amsfonts\amssymb.sty"
Package: amssymb 2013/01/14 v3.01 AMS font symbols
 ("C:\Users\chris\AppData\Local\Programs\MiKTeX 2.9\tex\latex\amsfonts\amsfonts.sty"
Package: amsfonts 2013/01/14 v3.01 Basic AMSFonts support
\symAMSa=\mathgroup4
\symAMSb=\mathgroup5
LaTeX Font Info:    Overwriting math alphabet `\mathfrak' in version `bold'
(Font)                  U/euf/m/n --> U/euf/b/n on input line 106.
)) ("C:\Users\chris\AppData\Local\Programs\MiKTeX 2.9\tex\latex\graphics\color.sty"
Package: color 2016/07/10 v1.1e Standard LaTeX Color (DPC)
 ("C:\Users\chris\AppData\Local\Programs\MiKTeX 2.9\tex\latex\graphics-cfg\color.cfg"
File: color.cfg 2016/01/02 v1.6 sample color configuration
)
Package color Info: Driver file: pdftex.def on input line 147.
) ("C:\Users\chris\AppData\Local\Programs\MiKTeX 2.9\tex\latex\base\inputenc.sty"
Package: inputenc 2015/03/17 v1.2c Input encoding file
\inpenc@prehook=\toks24
\inpenc@posthook=\toks25
) ("C:\Users\chris\AppData\Local\Programs\MiKTeX 2.9\tex\latex\tools\array.sty"
Package: array 2016/10/06 v2.4d Tabular extension package (FMi)
\col@sep=\dimen136
\extrarowheight=\dimen137
\NC@list=\toks26
\extratabsurround=\skip48
\backup@length=\skip49
) ("C:\Users\chris\AppData\Local\Programs\MiKTeX 2.9\tex\latex\url\url.sty"
\Urlmuskip=\muskip11
Package: url 2013/09/16  ver 3.4  Verb mode for urls, etc.
) ("C:\Users\chris\AppData\Local\Programs\MiKTeX 2.9\tex\latex\base\textcomp.sty"
Package: textcomp 2017/04/05 v2.0i Standard LaTeX package
Package textcomp Info: Sub-encoding information:
(textcomp)               5 = only ISO-Adobe without \textcurrency
(textcomp)               4 = 5 + \texteuro
(textcomp)               3 = 4 + \textohm
(textcomp)               2 = 3 + \textestimated + \textcurrency
(textcomp)               1 = TS1 - \textcircled - \t
(textcomp)               0 = TS1 (full)
(textcomp)             Font families with sub-encoding setting implement
(textcomp)             only a restricted character set as indicated.
(textcomp)             Family '?' is the default used for unknown fonts.
(textcomp)             See the documentation for details.
Package textcomp Info: Setting ? sub-encoding to TS1/1 on input line 79.
 ("C:\Users\chris\AppData\Local\Programs\MiKTeX 2.9\tex\latex\base\ts1enc.def"
File: ts1enc.def 2001/06/05 v3.0e (jk/car/fm) Standard LaTeX file
)
LaTeX Info: Redefining \oldstylenums on input line 334.
Package textcomp Info: Setting cmr sub-encoding to TS1/0 on input line 349.
Package textcomp Info: Setting cmss sub-encoding to TS1/0 on input line 350.
Package textcomp Info: Setting cmtt sub-encoding to TS1/0 on input line 351.
Package textcomp Info: Setting cmvtt sub-encoding to TS1/0 on input line 352.
Package textcomp Info: Setting cmbr sub-encoding to TS1/0 on input line 353.
Package textcomp Info: Setting cmtl sub-encoding to TS1/0 on input line 354.
Package textcomp Info: Setting ccr sub-encoding to TS1/0 on input line 355.
Package textcomp Info: Setting ptm sub-encoding to TS1/4 on input line 356.
Package textcomp Info: Setting pcr sub-encoding to TS1/4 on input line 357.
Package textcomp Info: Setting phv sub-encoding to TS1/4 on input line 358.
Package textcomp Info: Setting ppl sub-encoding to TS1/3 on input line 359.
Package textcomp Info: Setting pag sub-encoding to TS1/4 on input line 360.
Package textcomp Info: Setting pbk sub-encoding to TS1/4 on input line 361.
Package textcomp Info: Setting pnc sub-encoding to TS1/4 on input line 362.
Package textcomp Info: Setting pzc sub-encoding to TS1/4 on input line 363.
Package textcomp Info: Setting bch sub-encoding to TS1/4 on input line 364.
Package textcomp Info: Setting put sub-encoding to TS1/5 on input line 365.
Package textcomp Info: Setting uag sub-encoding to TS1/5 on input line 366.
Package textcomp Info: Setting ugq sub-encoding to TS1/5 on input line 367.
Package textcomp Info: Setting ul8 sub-encoding to TS1/4 on input line 368.
Package textcomp Info: Setting ul9 sub-encoding to TS1/4 on input line 369.
Package textcomp Info: Setting augie sub-encoding to TS1/5 on input line 370.
Package textcomp Info: Setting dayrom sub-encoding to TS1/3 on input line 371.
Package textcomp Info: Setting dayroms sub-encoding to TS1/3 on input line 372.
Package textcomp Info: Setting pxr sub-encoding to TS1/0 on input line 373.
Package textcomp Info: Setting pxss sub-encoding to TS1/0 on input line 374.
Package textcomp Info: Setting pxtt sub-encoding to TS1/0 on input line 375.
Package textcomp Info: Setting txr sub-encoding to TS1/0 on input line 376.
Package textcomp Info: Setting txss sub-encoding to TS1/0 on input line 377.
Package textcomp Info: Setting txtt sub-encoding to TS1/0 on input line 378.
Package textcomp Info: Setting lmr sub-encoding to TS1/0 on input line 379.
Package textcomp Info: Setting lmdh sub-encoding to TS1/0 on input line 380.
Package textcomp Info: Setting lmss sub-encoding to TS1/0 on input line 381.
Package textcomp Info: Setting lmssq sub-encoding to TS1/0 on input line 382.
Package textcomp Info: Setting lmvtt sub-encoding to TS1/0 on input line 383.
Package textcomp Info: Setting lmtt sub-encoding to TS1/0 on input line 384.
Package textcomp Info: Setting qhv sub-encoding to TS1/0 on input line 385.
Package textcomp Info: Setting qag sub-encoding to TS1/0 on input line 386.
Package textcomp Info: Setting qbk sub-encoding to TS1/0 on input line 387.
Package textcomp Info: Setting qcr sub-encoding to TS1/0 on input line 388.
Package textcomp Info: Setting qcs sub-encoding to TS1/0 on input line 389.
Package textcomp Info: Setting qpl sub-encoding to TS1/0 on input line 390.
Package textcomp Info: Setting qtm sub-encoding to TS1/0 on input line 391.
Package textcomp Info: Setting qzc sub-encoding to TS1/0 on input line 392.
Package textcomp Info: Setting qhvc sub-encoding to TS1/0 on input line 393.
Package textcomp Info: Setting futs sub-encoding to TS1/4 on input line 394.
Package textcomp Info: Setting futx sub-encoding to TS1/4 on input line 395.
Package textcomp Info: Setting futj sub-encoding to TS1/4 on input line 396.
Package textcomp Info: Setting hlh sub-encoding to TS1/3 on input line 397.
Package textcomp Info: Setting hls sub-encoding to TS1/3 on input line 398.
Package textcomp Info: Setting hlst sub-encoding to TS1/3 on input line 399.
Package textcomp Info: Setting hlct sub-encoding to TS1/5 on input line 400.
Package textcomp Info: Setting hlx sub-encoding to TS1/5 on input line 401.
Package textcomp Info: Setting hlce sub-encoding to TS1/5 on input line 402.
Package textcomp Info: Setting hlcn sub-encoding to TS1/5 on input line 403.
Package textcomp Info: Setting hlcw sub-encoding to TS1/5 on input line 404.
Package textcomp Info: Setting hlcf sub-encoding to TS1/5 on input line 405.
Package textcomp Info: Setting pplx sub-encoding to TS1/3 on input line 406.
Package textcomp Info: Setting pplj sub-encoding to TS1/3 on input line 407.
Package textcomp Info: Setting ptmx sub-encoding to TS1/4 on input line 408.
Package textcomp Info: Setting ptmj sub-encoding to TS1/4 on input line 409.
) ("C:\Users\chris\AppData\Local\Programs\MiKTeX 2.9\tex\latex\tools\tabularx.sty"
Package: tabularx 2016/02/03 v2.11 `tabularx' package (DPC)
\TX@col@width=\dimen138
\TX@old@table=\dimen139
\TX@old@col=\dimen140
\TX@target=\dimen141
\TX@delta=\dimen142
\TX@cols=\count128
\TX@ftn=\toks27
) ("C:\Users\chris\AppData\Local\Programs\MiKTeX 2.9\tex\latex\caption\subcaption.sty"
Package: subcaption 2018/05/01 v1.1-162 Sub-captions (AR)
 ("C:\Users\chris\AppData\Local\Programs\MiKTeX 2.9\tex\latex\caption\caption.sty"
Package: caption 2018/05/01 v3.3-147 Customizing captions (AR)
 ("C:\Users\chris\AppData\Local\Programs\MiKTeX 2.9\tex\latex\caption\caption3.sty"
Package: caption3 2018/05/27 v1.8a caption3 kernel (AR)
Package caption3 Info: TeX engine: e-TeX on input line 64.
\captionmargin=\dimen143
\captionmargin@=\dimen144
\captionwidth=\dimen145
\caption@tempdima=\dimen146
\caption@indent=\dimen147
\caption@parindent=\dimen148
\caption@hangindent=\dimen149
Package caption Info: Unknown document class (or package),
(caption)             standard defaults will be used.
)

Package caption Warning: Unsupported document class (or package) detected,
(caption)                usage of the caption package is not recommended.
See the caption package documentation for explanation.

Package caption Info: \@makecaption = \long macro:#1#2->\small \vskip \abovecaptionskip \sbox \@tempboxa {{\bfseries #1.} #2}\ifdim \wd \@tempboxa >\hsize {\bfseries #1.} #2\par \else \global \@minipagefalse \hb@xt@ \hsize {\hfil \box \@tempboxa \hfil }\fi \vskip \belowcaptionskip .
\c@ContinuedFloat=\count129
)
\c@subfigure=\count130
\c@subtable=\count131
) ("C:\Users\chris\AppData\Local\Programs\MiKTeX 2.9\tex\generic\genmisc\nth.sty"
Package: nth 2002/02/27
) (c:/Users\chris\Documents\Paper\Accepted\2020_ACCV_ASAN\0543-supp\543-supp.aux)
\openout1 = `543-supp.aux'.

LaTeX Font Info:    Checking defaults for OML/cmm/m/it on input line 25.
LaTeX Font Info:    ... okay on input line 25.
LaTeX Font Info:    Checking defaults for T1/cmr/m/n on input line 25.
LaTeX Font Info:    ... okay on input line 25.
LaTeX Font Info:    Checking defaults for OT1/cmr/m/n on input line 25.
LaTeX Font Info:    ... okay on input line 25.
LaTeX Font Info:    Checking defaults for OMS/cmsy/m/n on input line 25.
LaTeX Font Info:    ... okay on input line 25.
LaTeX Font Info:    Checking defaults for OMX/cmex/m/n on input line 25.
LaTeX Font Info:    ... okay on input line 25.
LaTeX Font Info:    Checking defaults for U/cmr/m/n on input line 25.
LaTeX Font Info:    ... okay on input line 25.
LaTeX Font Info:    Checking defaults for TS1/cmr/m/n on input line 25.
LaTeX Font Info:    Try loading font information for TS1+cmr on input line 25.
 ("C:\Users\chris\AppData\Local\Programs\MiKTeX 2.9\tex\latex\base\ts1cmr.fd"
File: ts1cmr.fd 2014/09/29 v2.5h Standard LaTeX font definitions
)
LaTeX Font Info:    ... okay on input line 25.
 ("C:\Users\chris\AppData\Local\Programs\MiKTeX 2.9\tex\context\base\supp-pdf.mkii"
[Loading MPS to PDF converter (version 2006.09.02).]
\scratchcounter=\count132
\scratchdimen=\dimen150
\scratchbox=\box56
\nofMPsegments=\count133
\nofMParguments=\count134
\everyMPshowfont=\toks28
\MPscratchCnt=\count135
\MPscratchDim=\dimen151
\MPnumerator=\count136
\makeMPintoPDFobject=\count137
\everyMPtoPDFconversion=\toks29
) ("C:\Users\chris\AppData\Local\Programs\MiKTeX 2.9\tex\latex\oberdiek\epstopdf-base.sty"
Package: epstopdf-base 2016/05/15 v2.6 Base part for package epstopdf
 ("C:\Users\chris\AppData\Local\Programs\MiKTeX 2.9\tex\generic\oberdiek\infwarerr.sty"
Package: infwarerr 2016/05/16 v1.4 Providing info/warning/error messages (HO)
) ("C:\Users\chris\AppData\Local\Programs\MiKTeX 2.9\tex\latex\oberdiek\grfext.sty"
Package: grfext 2016/05/16 v1.2 Manage graphics extensions (HO)
 ("C:\Users\chris\AppData\Local\Programs\MiKTeX 2.9\tex\generic\oberdiek\kvdefinekeys.sty"
Package: kvdefinekeys 2016/05/16 v1.4 Define keys (HO)
 ("C:\Users\chris\AppData\Local\Programs\MiKTeX 2.9\tex\generic\oberdiek\ltxcmds.sty"
Package: ltxcmds 2016/05/16 v1.23 LaTeX kernel commands for general use (HO)
))) ("C:\Users\chris\AppData\Local\Programs\MiKTeX 2.9\tex\latex\oberdiek\kvoptions.sty"
Package: kvoptions 2016/05/16 v3.12 Key value format for package options (HO)
 ("C:\Users\chris\AppData\Local\Programs\MiKTeX 2.9\tex\generic\oberdiek\kvsetkeys.sty"
Package: kvsetkeys 2016/05/16 v1.17 Key value parser (HO)
 ("C:\Users\chris\AppData\Local\Programs\MiKTeX 2.9\tex\generic\oberdiek\etexcmds.sty"
Package: etexcmds 2016/05/16 v1.6 Avoid name clashes with e-TeX commands (HO)
 ("C:\Users\chris\AppData\Local\Programs\MiKTeX 2.9\tex\generic\oberdiek\ifluatex.sty"
Package: ifluatex 2016/05/16 v1.4 Provides the ifluatex switch (HO)
Package ifluatex Info: LuaTeX not detected.
)
Package etexcmds Info: Could not find \expanded.
(etexcmds)             That can mean that you are not using pdfTeX 1.50 or
(etexcmds)             that some package has redefined \expanded.
(etexcmds)             In the latter case, load this package earlier.
))) ("C:\Users\chris\AppData\Local\Programs\MiKTeX 2.9\tex\generic\oberdiek\pdftexcmds.sty"
Package: pdftexcmds 2018/01/21 v0.26 Utility functions of pdfTeX for LuaTeX (HO)
 ("C:\Users\chris\AppData\Local\Programs\MiKTeX 2.9\tex\generic\oberdiek\ifpdf.sty"
Package: ifpdf 2017/03/15 v3.2 Provides the ifpdf switch
)
Package pdftexcmds Info: LuaTeX not detected.
Package pdftexcmds Info: \pdf@primitive is available.
Package pdftexcmds Info: \pdf@ifprimitive is available.
Package pdftexcmds Info: \pdfdraftmode found.
)
Package epstopdf-base Info: Redefining graphics rule for `.eps' on input line 438.
Package grfext Info: Graphics extension search list:
(grfext)             [.pdf,.png,.jpg,.mps,.jpeg,.jbig2,.jb2,.PDF,.PNG,.JPG,.JPEG,.JBIG2,.JB2,.eps]
(grfext)             \AppendGraphicsExtensions on input line 456.
)
Package caption Info: Begin \AtBeginDocument code.
Package caption Info: Incompatible package detected (regarding \@caption).
(caption)             \@caption = \long macro:#1[#2]#3->\par \addcontentsline {\csname ext@#1\endcsname }{#1}{\protect \numberline {\csname the#1\endcsname }{\ignorespaces #2}}\begingroup \@parboxrestore \@makecaption {\csname fnum@#1\endcsname }{\ignorespaces #3}\par \endgroup .


Package caption Warning: Forced redefinition of \caption since the
(caption)                unsupported(!) package option `compatibility=false'
(caption)                was given.
See the caption package documentation for explanation.

Package caption Info: End \AtBeginDocument code.
LaTeX Font Info:    Try loading font information for U+msa on input line 44.
("C:\Users\chris\AppData\Local\Programs\MiKTeX 2.9\tex\latex\amsfonts\umsa.fd"
File: umsa.fd 2013/01/14 v3.01 AMS symbols A
)
LaTeX Font Info:    Try loading font information for U+msb on input line 44.
 ("C:\Users\chris\AppData\Local\Programs\MiKTeX 2.9\tex\latex\amsfonts\umsb.fd"
File: umsb.fd 2013/01/14 v3.01 AMS symbols B
)
LaTeX Font Info:    Try loading font information for OMS+cmtt on input line 44.
LaTeX Font Info:    No file OMScmtt.fd. on input line 44.


LaTeX Font Warning: Font shape `OMS/cmtt/m/n' undefined
(Font)              using `OMS/cmsy/m/n' instead
(Font)              for symbol `textbraceleft' on input line 44.


LaTeX Warning: No positions in optional float specifier.
               Default added (so using `htbp') on input line 63.

<DANN_plot_angle.pdf, id=1, 402.4015pt x 304.79446pt>
File: DANN_plot_angle.pdf Graphic file (type pdf)
<use DANN_plot_angle.pdf>
Package pdftex.def Info: DANN_plot_angle.pdf  used on input line 66.
(pdftex.def)             Requested size: 107.60744pt x 81.50496pt.

Underfull \hbox (badness 3148) in paragraph at lines 67--67
[]\OT1/cmr/m/n/9 (a) |Rad. of DANN [2]
 []


Underfull \hbox (badness 10000) in paragraph at lines 67--67
\OT1/cmr/m/n/9 Bottleneck-Feature Sub-
 []

<CDAN_plot_angle.pdf, id=2, 402.4015pt x 304.79446pt>
File: CDAN_plot_angle.pdf Graphic file (type pdf)
<use CDAN_plot_angle.pdf>
Package pdftex.def Info: CDAN_plot_angle.pdf  used on input line 70.
(pdftex.def)             Requested size: 107.60744pt x 81.50496pt.

Underfull \hbox (badness 3029) in paragraph at lines 71--71
[]\OT1/cmr/m/n/9 (b) |Rad. of CDAN [4]
 []


Underfull \hbox (badness 10000) in paragraph at lines 71--71
\OT1/cmr/m/n/9 Bottleneck-Feature Sub-
 []

<ASAN_plot_angle.pdf, id=3, 402.4015pt x 304.79446pt>
File: ASAN_plot_angle.pdf Graphic file (type pdf)
<use ASAN_plot_angle.pdf>
Package pdftex.def Info: ASAN_plot_angle.pdf  used on input line 74.
(pdftex.def)             Requested size: 107.60744pt x 81.50496pt.

Underfull \hbox (badness 10000) in paragraph at lines 75--75
[]\OT1/cmr/m/n/9 (c) |Rad. of ASAN
 []


Underfull \hbox (badness 10000) in paragraph at lines 75--75
\OT1/cmr/m/n/9 Bottleneck-Feature Sub-
 []

[1


{C:/Users/chris/AppData/Local/MiKTeX/2.9/pdftex/config/pdftex.map}] [2 <c:/Users/chris/Documents/Paper/Accepted/2020_ACCV_ASAN/0543-supp/DANN_plot_angle.pdf> <c:/Users/chris/Documents/Paper/Accepted/2020_ACCV_ASAN/0543-supp/CDAN_plot_angle.pdf

pdfTeX warning: pdflatex (file c:/Users/chris/Documents/Paper/Accepted/2020_ACCV_ASAN/0543-supp/CDAN_plot_angle.pdf): PDF inclusion: multiple pdfs with page group included in a single page
> <c:/Users/chris/Documents/Paper/Accepted/2020_ACCV_ASAN/0543-supp/ASAN_plot_angle.pdf

pdfTeX warning: pdflatex (file c:/Users/chris/Documents/Paper/Accepted/2020_ACCV_ASAN/0543-supp/ASAN_plot_angle.pdf): PDF inclusion: multiple pdfs with page group included in a single page
>]

LaTeX Warning: No positions in optional float specifier.
               Default added (so using `htbp') on input line 85.


LaTeX Warning: No positions in optional float specifier.
               Default added (so using `htbp') on input line 108.

<plot_hyperparmeter.pdf, id=129, 402.4015pt x 304.79446pt>
File: plot_hyperparmeter.pdf Graphic file (type pdf)
<use plot_hyperparmeter.pdf>
Package pdftex.def Info: plot_hyperparmeter.pdf  used on input line 110.
(pdftex.def)             Requested size: 242.98541pt x 184.05008pt.
[3] [4 <c:/Users/chris/Documents/Paper/Accepted/2020_ACCV_ASAN/0543-supp/plot_hyperparmeter.pdf>]

LaTeX Warning: No positions in optional float specifier.
               Default added (so using `htbp') on input line 144.

<plot_transfer_ic.pdf, id=187, 406.83995pt x 312.57353pt>
File: plot_transfer_ic.pdf Graphic file (type pdf)
<use plot_transfer_ic.pdf>
Package pdftex.def Info: plot_transfer_ic.pdf  used on input line 147.
(pdftex.def)             Requested size: 111.08206pt x 85.34033pt.
<plot_target_acc.pdf, id=188, 404.00122pt x 312.57353pt>
File: plot_target_acc.pdf Graphic file (type pdf)
<use plot_target_acc.pdf>
Package pdftex.def Info: plot_target_acc.pdf  used on input line 151.
(pdftex.def)             Requested size: 111.08206pt x 85.94128pt.
<plot_train_test.pdf, id=189, 395.06158pt x 312.57353pt>
File: plot_train_test.pdf Graphic file (type pdf)
<use plot_train_test.pdf>
Package pdftex.def Info: plot_train_test.pdf  used on input line 155.
(pdftex.def)             Requested size: 111.08206pt x 87.88724pt.
[5] [6 <c:/Users/chris/Documents/Paper/Accepted/2020_ACCV_ASAN/0543-supp/plot_transfer_ic.pdf> <c:/Users/chris/Documents/Paper/Accepted/2020_ACCV_ASAN/0543-supp/plot_target_acc.pdf

pdfTeX warning: pdflatex (file c:/Users/chris/Documents/Paper/Accepted/2020_ACCV_ASAN/0543-supp/plot_target_acc.pdf): PDF inclusion: multiple pdfs with page group included in a single page
> <c:/Users/chris/Documents/Paper/Accepted/2020_ACCV_ASAN/0543-supp/plot_train_test.pdf

pdfTeX warning: pdflatex (file c:/Users/chris/Documents/Paper/Accepted/2020_ACCV_ASAN/0543-supp/plot_train_test.pdf): PDF inclusion: multiple pdfs with page group included in a single page
>]

LaTeX Warning: No positions in optional float specifier.
               Default added (so using `htbp') on input line 166.

<tsne_DANN_features_domain_.pdf, id=303, 369.19933pt x 277.85005pt>
File: tsne_DANN_features_domain_.pdf Graphic file (type pdf)
<use tsne_DANN_features_domain_.pdf>
Package pdftex.def Info: tsne_DANN_features_domain_.pdf  used on input line 169.
(pdftex.def)             Requested size: 111.08206pt x 83.5973pt.
<tsne_CDAN_features_domain_.pdf, id=304, 369.19933pt x 277.85005pt>
File: tsne_CDAN_features_domain_.pdf Graphic file (type pdf)
<use tsne_CDAN_features_domain_.pdf>
Package pdftex.def Info: tsne_CDAN_features_domain_.pdf  used on input line 173.
(pdftex.def)             Requested size: 111.08206pt x 83.5973pt.
<tsne_ASAN_features_domain_.pdf, id=305, 369.19933pt x 277.85005pt>
File: tsne_ASAN_features_domain_.pdf Graphic file (type pdf)
<use tsne_ASAN_features_domain_.pdf>
Package pdftex.def Info: tsne_ASAN_features_domain_.pdf  used on input line 177.
(pdftex.def)             Requested size: 111.08206pt x 83.5973pt.
<tsne_DANN_classification_.pdf, id=306, 369.19933pt x 277.85005pt>
File: tsne_DANN_classification_.pdf Graphic file (type pdf)
<use tsne_DANN_classification_.pdf>
Package pdftex.def Info: tsne_DANN_classification_.pdf  used on input line 181.
(pdftex.def)             Requested size: 111.08206pt x 83.5973pt.
<tsne_CDAN_classification_.pdf, id=307, 369.19933pt x 277.85005pt>
File: tsne_CDAN_classification_.pdf Graphic file (type pdf)
<use tsne_CDAN_classification_.pdf>
Package pdftex.def Info: tsne_CDAN_classification_.pdf  used on input line 185.
(pdftex.def)             Requested size: 111.08206pt x 83.5973pt.
<tsne_ASAN_classification_.pdf, id=308, 369.19933pt x 277.85005pt>
File: tsne_ASAN_classification_.pdf Graphic file (type pdf)
<use tsne_ASAN_classification_.pdf>
Package pdftex.def Info: tsne_ASAN_classification_.pdf  used on input line 189.
(pdftex.def)             Requested size: 111.08206pt x 83.5973pt.
<dataset/Office-31/amazon/back_back/frame_0001.jpg, id=309, 301.125pt x 301.125pt>
File: dataset/Office-31/amazon/back_back/frame_0001.jpg Graphic file (type jpg)
<use dataset/Office-31/amazon/back_back/frame_0001.jpg>
Package pdftex.def Info: dataset/Office-31/amazon/back_back/frame_0001.jpg  used on input line 234.
(pdftex.def)             Requested size: 31.29512pt x 31.29512pt.
<dataset/Office-31/amazon/back_back/frame_0002.jpg, id=310, 301.125pt x 301.125pt>
File: dataset/Office-31/amazon/back_back/frame_0002.jpg Graphic file (type jpg)
<use dataset/Office-31/amazon/back_back/frame_0002.jpg>
Package pdftex.def Info: dataset/Office-31/amazon/back_back/frame_0002.jpg  used on input line 234.
(pdftex.def)             Requested size: 31.29512pt x 31.29512pt.
<dataset/Office-31/amazon/back_back/frame_0003.jpg, id=311, 301.125pt x 301.125pt>
File: dataset/Office-31/amazon/back_back/frame_0003.jpg Graphic file (type jpg)
<use dataset/Office-31/amazon/back_back/frame_0003.jpg>
Package pdftex.def Info: dataset/Office-31/amazon/back_back/frame_0003.jpg  used on input line 234.
(pdftex.def)             Requested size: 31.29512pt x 31.29512pt.
<dataset/Office-31/dslr/back_pack/frame_0001.jpg, id=312, 1003.75pt x 1003.75pt>
File: dataset/Office-31/dslr/back_pack/frame_0001.jpg Graphic file (type jpg)
<use dataset/Office-31/dslr/back_pack/frame_0001.jpg>
Package pdftex.def Info: dataset/Office-31/dslr/back_pack/frame_0001.jpg  used on input line 234.
(pdftex.def)             Requested size: 31.29053pt x 31.29053pt.
<dataset/Office-31/dslr/back_pack/frame_0008.jpg, id=313, 1003.75pt x 1003.75pt>
File: dataset/Office-31/dslr/back_pack/frame_0008.jpg Graphic file (type jpg)
<use dataset/Office-31/dslr/back_pack/frame_0008.jpg>
Package pdftex.def Info: dataset/Office-31/dslr/back_pack/frame_0008.jpg  used on input line 234.
(pdftex.def)             Requested size: 31.29053pt x 31.29053pt.
<dataset/Office-31/dslr/back_pack/frame_0012.jpg, id=314, 1003.75pt x 1003.75pt>
File: dataset/Office-31/dslr/back_pack/frame_0012.jpg Graphic file (type jpg)
<use dataset/Office-31/dslr/back_pack/frame_0012.jpg>
Package pdftex.def Info: dataset/Office-31/dslr/back_pack/frame_0012.jpg  used on input line 234.
(pdftex.def)             Requested size: 31.29053pt x 31.29053pt.
<dataset/Office-31/webcam/back_pack/frame_0007.jpg, id=315, 495.8525pt x 495.8525pt>
File: dataset/Office-31/webcam/back_pack/frame_0007.jpg Graphic file (type jpg)
<use dataset/Office-31/webcam/back_pack/frame_0007.jpg>
Package pdftex.def Info: dataset/Office-31/webcam/back_pack/frame_0007.jpg  used on input line 234.
(pdftex.def)             Requested size: 31.29333pt x 31.29333pt.
<dataset/Office-31/webcam/back_pack/frame_0018.jpg, id=316, 491.8375pt x 491.8375pt>
File: dataset/Office-31/webcam/back_pack/frame_0018.jpg Graphic file (type jpg)
<use dataset/Office-31/webcam/back_pack/frame_0018.jpg>
Package pdftex.def Info: dataset/Office-31/webcam/back_pack/frame_0018.jpg  used on input line 234.
(pdftex.def)             Requested size: 31.29512pt x 31.29512pt.
<dataset/Office-31/webcam/back_pack/frame_0026.jpg, id=317, 558.085pt x 558.085pt>
File: dataset/Office-31/webcam/back_pack/frame_0026.jpg Graphic file (type jpg)
<use dataset/Office-31/webcam/back_pack/frame_0026.jpg>
Package pdftex.def Info: dataset/Office-31/webcam/back_pack/frame_0026.jpg  used on input line 234.
(pdftex.def)             Requested size: 31.29512pt x 31.29512pt.
<dataset/Office-31/amazon/bike/frame_0001.jpg, id=318, 301.125pt x 301.125pt>
File: dataset/Office-31/amazon/bike/frame_0001.jpg Graphic file (type jpg)
<use dataset/Office-31/amazon/bike/frame_0001.jpg>
Package pdftex.def Info: dataset/Office-31/amazon/bike/frame_0001.jpg  used on input line 234.
(pdftex.def)             Requested size: 31.29512pt x 31.29512pt.
<dataset/Office-31/amazon/bike/frame_0002.jpg, id=319, 301.125pt x 301.125pt>
File: dataset/Office-31/amazon/bike/frame_0002.jpg Graphic file (type jpg)
<use dataset/Office-31/amazon/bike/frame_0002.jpg>
Package pdftex.def Info: dataset/Office-31/amazon/bike/frame_0002.jpg  used on input line 234.
(pdftex.def)             Requested size: 31.29512pt x 31.29512pt.
<dataset/Office-31/amazon/bike/frame_0003.jpg, id=320, 301.125pt x 301.125pt>
File: dataset/Office-31/amazon/bike/frame_0003.jpg Graphic file (type jpg)
<use dataset/Office-31/amazon/bike/frame_0003.jpg>
Package pdftex.def Info: dataset/Office-31/amazon/bike/frame_0003.jpg  used on input line 234.
(pdftex.def)             Requested size: 31.29512pt x 31.29512pt.
<dataset/Office-31/dslr/bike/frame_0001.jpg, id=321, 1003.75pt x 1003.75pt>
File: dataset/Office-31/dslr/bike/frame_0001.jpg Graphic file (type jpg)
<use dataset/Office-31/dslr/bike/frame_0001.jpg>
Package pdftex.def Info: dataset/Office-31/dslr/bike/frame_0001.jpg  used on input line 234.
(pdftex.def)             Requested size: 31.29053pt x 31.29053pt.
<dataset/Office-31/dslr/bike/frame_0008.jpg, id=322, 1003.75pt x 1003.75pt>
File: dataset/Office-31/dslr/bike/frame_0008.jpg Graphic file (type jpg)
<use dataset/Office-31/dslr/bike/frame_0008.jpg>
Package pdftex.def Info: dataset/Office-31/dslr/bike/frame_0008.jpg  used on input line 234.
(pdftex.def)             Requested size: 31.29053pt x 31.29053pt.
<dataset/Office-31/dslr/bike/frame_0009.jpg, id=323, 1003.75pt x 1003.75pt>
File: dataset/Office-31/dslr/bike/frame_0009.jpg Graphic file (type jpg)
<use dataset/Office-31/dslr/bike/frame_0009.jpg>
Package pdftex.def Info: dataset/Office-31/dslr/bike/frame_0009.jpg  used on input line 234.
(pdftex.def)             Requested size: 31.29053pt x 31.29053pt.
<dataset/Office-31/webcam/bike/frame_0002.jpg, id=324, 712.6625pt x 712.6625pt>
File: dataset/Office-31/webcam/bike/frame_0002.jpg Graphic file (type jpg)
<use dataset/Office-31/webcam/bike/frame_0002.jpg>
Package pdftex.def Info: dataset/Office-31/webcam/bike/frame_0002.jpg  used on input line 234.
(pdftex.def)             Requested size: 31.29634pt x 31.29634pt.
<dataset/Office-31/webcam/bike/frame_0003.jpg, id=325, 751.80875pt x 751.80875pt>
File: dataset/Office-31/webcam/bike/frame_0003.jpg Graphic file (type jpg)
<use dataset/Office-31/webcam/bike/frame_0003.jpg>
Package pdftex.def Info: dataset/Office-31/webcam/bike/frame_0003.jpg  used on input line 234.
(pdftex.def)             Requested size: 31.2947pt x 31.2947pt.
<dataset/Office-31/webcam/bike/frame_0010.jpg, id=326, 568.1225pt x 568.1225pt>
File: dataset/Office-31/webcam/bike/frame_0010.jpg Graphic file (type jpg)
<use dataset/Office-31/webcam/bike/frame_0010.jpg>
Package pdftex.def Info: dataset/Office-31/webcam/bike/frame_0010.jpg  used on input line 234.
(pdftex.def)             Requested size: 31.29451pt x 31.29451pt.
<dataset/Office-31/amazon/desk_lamp/frame_0001.jpg, id=327, 301.125pt x 301.125pt>
File: dataset/Office-31/amazon/desk_lamp/frame_0001.jpg Graphic file (type jpg)
<use dataset/Office-31/amazon/desk_lamp/frame_0001.jpg>
Package pdftex.def Info: dataset/Office-31/amazon/desk_lamp/frame_0001.jpg  used on input line 234.
(pdftex.def)             Requested size: 31.29512pt x 31.29512pt.
<dataset/Office-31/amazon/desk_lamp/frame_0002.jpg, id=328, 301.125pt x 301.125pt>
File: dataset/Office-31/amazon/desk_lamp/frame_0002.jpg Graphic file (type jpg)
<use dataset/Office-31/amazon/desk_lamp/frame_0002.jpg>
Package pdftex.def Info: dataset/Office-31/amazon/desk_lamp/frame_0002.jpg  used on input line 234.
(pdftex.def)             Requested size: 31.29512pt x 31.29512pt.
<dataset/Office-31/dslr/desk_lamp/frame_0004.jpg, id=329, 1003.75pt x 1003.75pt>
File: dataset/Office-31/dslr/desk_lamp/frame_0004.jpg Graphic file (type jpg)
<use dataset/Office-31/dslr/desk_lamp/frame_0004.jpg>
Package pdftex.def Info: dataset/Office-31/dslr/desk_lamp/frame_0004.jpg  used on input line 234.
(pdftex.def)             Requested size: 31.29053pt x 31.29053pt.
<dataset/Office-31/dslr/desk_lamp/frame_0006.jpg, id=330, 1003.75pt x 1003.75pt>
File: dataset/Office-31/dslr/desk_lamp/frame_0006.jpg Graphic file (type jpg)
<use dataset/Office-31/dslr/desk_lamp/frame_0006.jpg>
Package pdftex.def Info: dataset/Office-31/dslr/desk_lamp/frame_0006.jpg  used on input line 234.
(pdftex.def)             Requested size: 31.29053pt x 31.29053pt.
File: dataset/Office-31/dslr/desk_lamp/frame_0004.jpg Graphic file (type jpg)
<use dataset/Office-31/dslr/desk_lamp/frame_0004.jpg>
Package pdftex.def Info: dataset/Office-31/dslr/desk_lamp/frame_0004.jpg  used on input line 234.
(pdftex.def)             Requested size: 31.29053pt x 31.29053pt.
<dataset/Office-31/dslr/desk_lamp/frame_0010.jpg, id=331, 1003.75pt x 1003.75pt>
File: dataset/Office-31/dslr/desk_lamp/frame_0010.jpg Graphic file (type jpg)
<use dataset/Office-31/dslr/desk_lamp/frame_0010.jpg>
Package pdftex.def Info: dataset/Office-31/dslr/desk_lamp/frame_0010.jpg  used on input line 234.
(pdftex.def)             Requested size: 31.29053pt x 31.29053pt.
<dataset/Office-31/webcam/desk_lamp/frame_0006.jpg, id=332, 482.80376pt x 482.80376pt>
File: dataset/Office-31/webcam/desk_lamp/frame_0006.jpg Graphic file (type jpg)
<use dataset/Office-31/webcam/desk_lamp/frame_0006.jpg>
Package pdftex.def Info: dataset/Office-31/webcam/desk_lamp/frame_0006.jpg  used on input line 234.
(pdftex.def)             Requested size: 31.29494pt x 31.29494pt.
<dataset/Office-31/webcam/desk_lamp/frame_0008.jpg, id=333, 467.7475pt x 467.7475pt>
File: dataset/Office-31/webcam/desk_lamp/frame_0008.jpg Graphic file (type jpg)
<use dataset/Office-31/webcam/desk_lamp/frame_0008.jpg>
Package pdftex.def Info: dataset/Office-31/webcam/desk_lamp/frame_0008.jpg  used on input line 234.
(pdftex.def)             Requested size: 31.2968pt x 31.2968pt.
<dataset/Office-31/webcam/desk_lamp/frame_0012.jpg, id=334, 585.18625pt x 585.18625pt>
File: dataset/Office-31/webcam/desk_lamp/frame_0012.jpg Graphic file (type jpg)
<use dataset/Office-31/webcam/desk_lamp/frame_0012.jpg>
Package pdftex.def Info: dataset/Office-31/webcam/desk_lamp/frame_0012.jpg  used on input line 234.
(pdftex.def)             Requested size: 31.29688pt x 31.29688pt.
[7 <c:/Users/chris/Documents/Paper/Accepted/2020_ACCV_ASAN/0543-supp/tsne_DANN_features_domain_.pdf> <c:/Users/chris/Documents/Paper/Accepted/2020_ACCV_ASAN/0543-supp/tsne_CDAN_features_domain_.pdf

pdfTeX warning: pdflatex (file c:/Users/chris/Documents/Paper/Accepted/2020_ACCV_ASAN/0543-supp/tsne_CDAN_features_domain_.pdf): PDF inclusion: multiple pdfs with page group included in a single page
> <c:/Users/chris/Documents/Paper/Accepted/2020_ACCV_ASAN/0543-supp/tsne_ASAN_features_domain_.pdf

pdfTeX warning: pdflatex (file c:/Users/chris/Documents/Paper/Accepted/2020_ACCV_ASAN/0543-supp/tsne_ASAN_features_domain_.pdf): PDF inclusion: multiple pdfs with page group included in a single page
> <c:/Users/chris/Documents/Paper/Accepted/2020_ACCV_ASAN/0543-supp/tsne_DANN_classification_.pdf

pdfTeX warning: pdflatex (file c:/Users/chris/Documents/Paper/Accepted/2020_ACCV_ASAN/0543-supp/tsne_DANN_classification_.pdf): PDF inclusion: multiple pdfs with page group included in a single page
> <c:/Users/chris/Documents/Paper/Accepted/2020_ACCV_ASAN/0543-supp/tsne_CDAN_classification_.pdf

pdfTeX warning: pdflatex (file c:/Users/chris/Documents/Paper/Accepted/2020_ACCV_ASAN/0543-supp/tsne_CDAN_classification_.pdf): PDF inclusion: multiple pdfs with page group included in a single page
> <c:/Users/chris/Documents/Paper/Accepted/2020_ACCV_ASAN/0543-supp/tsne_ASAN_classification_.pdf

pdfTeX warning: pdflatex (file c:/Users/chris/Documents/Paper/Accepted/2020_ACCV_ASAN/0543-supp/tsne_ASAN_classification_.pdf): PDF inclusion: multiple pdfs with page group included in a single page
>]
<dataset/imageClef/c/0/251_0023.jpg, id=353, 256.96pt x 256.96pt>
File: dataset/imageClef/c/0/251_0023.jpg Graphic file (type jpg)
<use dataset/imageClef/c/0/251_0023.jpg>
Package pdftex.def Info: dataset/imageClef/c/0/251_0023.jpg  used on input line 274.
(pdftex.def)             Requested size: 31.29652pt x 31.29652pt.
<dataset/imageClef/c/0/251_0090.jpg, id=354, 256.96pt x 256.96pt>
File: dataset/imageClef/c/0/251_0090.jpg Graphic file (type jpg)
<use dataset/imageClef/c/0/251_0090.jpg>
Package pdftex.def Info: dataset/imageClef/c/0/251_0090.jpg  used on input line 274.
(pdftex.def)             Requested size: 31.29652pt x 31.29652pt.
<dataset/imageClef/c/0/251_0115.jpg, id=355, 256.96pt x 256.96pt>
File: dataset/imageClef/c/0/251_0115.jpg Graphic file (type jpg)
<use dataset/imageClef/c/0/251_0115.jpg>
Package pdftex.def Info: dataset/imageClef/c/0/251_0115.jpg  used on input line 274.
(pdftex.def)             Requested size: 31.29652pt x 31.29652pt.
<dataset/imageClef/p/0/2008_005905.jpg, id=356, 256.96pt x 256.96pt>
File: dataset/imageClef/p/0/2008_005905.jpg Graphic file (type jpg)
<use dataset/imageClef/p/0/2008_005905.jpg>
Package pdftex.def Info: dataset/imageClef/p/0/2008_005905.jpg  used on input line 274.
(pdftex.def)             Requested size: 31.29652pt x 31.29652pt.
<dataset/imageClef/p/0/2011_002751.jpg, id=357, 256.96pt x 256.96pt>
File: dataset/imageClef/p/0/2011_002751.jpg Graphic file (type jpg)
<use dataset/imageClef/p/0/2011_002751.jpg>
Package pdftex.def Info: dataset/imageClef/p/0/2011_002751.jpg  used on input line 274.
(pdftex.def)             Requested size: 31.29652pt x 31.29652pt.
<dataset/imageClef/p/0/2011_002993.jpg, id=358, 256.96pt x 256.96pt>
File: dataset/imageClef/p/0/2011_002993.jpg Graphic file (type jpg)
<use dataset/imageClef/p/0/2011_002993.jpg>
Package pdftex.def Info: dataset/imageClef/p/0/2011_002993.jpg  used on input line 274.
(pdftex.def)             Requested size: 31.29652pt x 31.29652pt.
<dataset/imageClef/i/0/n02691156_11729.JPEG, id=359, 321.6015pt x 361.35pt>
File: dataset/imageClef/i/0/n02691156_11729.JPEG Graphic file (type jpg)
<use dataset/imageClef/i/0/n02691156_11729.JPEG>
Package pdftex.def Info: dataset/imageClef/i/0/n02691156_11729.JPEG  used on input line 274.
(pdftex.def)             Requested size: 27.85347pt x 31.29604pt.
<dataset/imageClef/i/0/n02691156_1806.JPEG, id=360, 376.40625pt x 250.68657pt>
File: dataset/imageClef/i/0/n02691156_1806.JPEG Graphic file (type jpg)
<use dataset/imageClef/i/0/n02691156_1806.JPEG>
Package pdftex.def Info: dataset/imageClef/i/0/n02691156_1806.JPEG  used on input line 274.
(pdftex.def)             Requested size: 31.29626pt x 20.8433pt.
<dataset/imageClef/i/0/n02691156_49198.JPEG, id=361, 376.40625pt x 301.125pt>
File: dataset/imageClef/i/0/n02691156_49198.JPEG Graphic file (type jpg)
<use dataset/imageClef/i/0/n02691156_49198.JPEG>
Package pdftex.def Info: dataset/imageClef/i/0/n02691156_49198.JPEG  used on input line 274.
(pdftex.def)             Requested size: 31.29626pt x 25.03702pt.
<dataset/imageClef/c/1/224_0007.jpg, id=362, 256.96pt x 256.96pt>
File: dataset/imageClef/c/1/224_0007.jpg Graphic file (type jpg)
<use dataset/imageClef/c/1/224_0007.jpg>
Package pdftex.def Info: dataset/imageClef/c/1/224_0007.jpg  used on input line 274.
(pdftex.def)             Requested size: 31.29652pt x 31.29652pt.
<dataset/imageClef/c/1/224_0044.jpg, id=363, 256.96pt x 256.96pt>
File: dataset/imageClef/c/1/224_0044.jpg Graphic file (type jpg)
<use dataset/imageClef/c/1/224_0044.jpg>
Package pdftex.def Info: dataset/imageClef/c/1/224_0044.jpg  used on input line 274.
(pdftex.def)             Requested size: 31.29652pt x 31.29652pt.
<dataset/imageClef/c/1/224_0067.jpg, id=364, 256.96pt x 256.96pt>
File: dataset/imageClef/c/1/224_0067.jpg Graphic file (type jpg)
<use dataset/imageClef/c/1/224_0067.jpg>
Package pdftex.def Info: dataset/imageClef/c/1/224_0067.jpg  used on input line 274.
(pdftex.def)             Requested size: 31.29652pt x 31.29652pt.
<dataset/imageClef/p/1/2008_005175.jpg, id=365, 256.96pt x 256.96pt>
File: dataset/imageClef/p/1/2008_005175.jpg Graphic file (type jpg)
<use dataset/imageClef/p/1/2008_005175.jpg>
Package pdftex.def Info: dataset/imageClef/p/1/2008_005175.jpg  used on input line 274.
(pdftex.def)             Requested size: 31.29652pt x 31.29652pt.
<dataset/imageClef/p/1/2008_007510.jpg, id=366, 256.96pt x 256.96pt>
File: dataset/imageClef/p/1/2008_007510.jpg Graphic file (type jpg)
<use dataset/imageClef/p/1/2008_007510.jpg>
Package pdftex.def Info: dataset/imageClef/p/1/2008_007510.jpg  used on input line 274.
(pdftex.def)             Requested size: 31.29652pt x 31.29652pt.
<dataset/imageClef/p/1/2011_000087.jpg, id=367, 256.96pt x 256.96pt>
File: dataset/imageClef/p/1/2011_000087.jpg Graphic file (type jpg)
<use dataset/imageClef/p/1/2011_000087.jpg>
Package pdftex.def Info: dataset/imageClef/p/1/2011_000087.jpg  used on input line 274.
(pdftex.def)             Requested size: 31.29652pt x 31.29652pt.
<dataset/imageClef/i/1/n02834778_2737.JPEG, id=368, 329.23pt x 501.875pt>
File: dataset/imageClef/i/1/n02834778_2737.JPEG Graphic file (type jpg)
<use dataset/imageClef/i/1/n02834778_2737.JPEG>
Package pdftex.def Info: dataset/imageClef/i/1/n02834778_2737.JPEG  used on input line 274.
(pdftex.def)             Requested size: 20.5316pt x 31.29819pt.
<dataset/imageClef/i/1/n02834778_763.JPEG, id=369, 80.2197pt x 120.45pt>
File: dataset/imageClef/i/1/n02834778_763.JPEG Graphic file (type jpg)
<use dataset/imageClef/i/1/n02834778_763.JPEG>
Package pdftex.def Info: dataset/imageClef/i/1/n02834778_763.JPEG  used on input line 274.
(pdftex.def)             Requested size: 20.84438pt x 31.29787pt.
<dataset/imageClef/i/1/n02834778_8949.JPEG, id=370, 376.40625pt x 252.19218pt>
File: dataset/imageClef/i/1/n02834778_8949.JPEG Graphic file (type jpg)
<use dataset/imageClef/i/1/n02834778_8949.JPEG>
Package pdftex.def Info: dataset/imageClef/i/1/n02834778_8949.JPEG  used on input line 274.
(pdftex.def)             Requested size: 31.29626pt x 20.96849pt.
<dataset/imageClef/c/2/113_0022.jpg, id=371, 256.96pt x 256.96pt>
File: dataset/imageClef/c/2/113_0022.jpg Graphic file (type jpg)
<use dataset/imageClef/c/2/113_0022.jpg>
Package pdftex.def Info: dataset/imageClef/c/2/113_0022.jpg  used on input line 274.
(pdftex.def)             Requested size: 31.29652pt x 31.29652pt.
<dataset/imageClef/c/2/113_0115.jpg, id=372, 256.96pt x 256.96pt>
File: dataset/imageClef/c/2/113_0115.jpg Graphic file (type jpg)
<use dataset/imageClef/c/2/113_0115.jpg>
Package pdftex.def Info: dataset/imageClef/c/2/113_0115.jpg  used on input line 274.
(pdftex.def)             Requested size: 31.29652pt x 31.29652pt.
<dataset/imageClef/c/2/113_0116.jpg, id=373, 256.96pt x 256.96pt>
File: dataset/imageClef/c/2/113_0116.jpg Graphic file (type jpg)
<use dataset/imageClef/c/2/113_0116.jpg>
Package pdftex.def Info: dataset/imageClef/c/2/113_0116.jpg  used on input line 274.
(pdftex.def)             Requested size: 31.29652pt x 31.29652pt.
<dataset/imageClef/p/2/2008_007003.jpg, id=374, 256.96pt x 256.96pt>
File: dataset/imageClef/p/2/2008_007003.jpg Graphic file (type jpg)
<use dataset/imageClef/p/2/2008_007003.jpg>
Package pdftex.def Info: dataset/imageClef/p/2/2008_007003.jpg  used on input line 274.
(pdftex.def)             Requested size: 31.29652pt x 31.29652pt.
<dataset/imageClef/p/2/2008_007486.jpg, id=375, 256.96pt x 256.96pt>
File: dataset/imageClef/p/2/2008_007486.jpg Graphic file (type jpg)
<use dataset/imageClef/p/2/2008_007486.jpg>
Package pdftex.def Info: dataset/imageClef/p/2/2008_007486.jpg  used on input line 274.
(pdftex.def)             Requested size: 31.29652pt x 31.29652pt.
<dataset/imageClef/p/2/2009_003285.jpg, id=376, 256.96pt x 256.96pt>
File: dataset/imageClef/p/2/2009_003285.jpg Graphic file (type jpg)
<use dataset/imageClef/p/2/2009_003285.jpg>
Package pdftex.def Info: dataset/imageClef/p/2/2009_003285.jpg  used on input line 274.
(pdftex.def)             Requested size: 31.29652pt x 31.29652pt.
<dataset/imageClef/i/2/n01503061_12696.JPEG, id=377, 501.875pt x 346.29375pt>
File: dataset/imageClef/i/2/n01503061_12696.JPEG Graphic file (type jpg)
<use dataset/imageClef/i/2/n01503061_12696.JPEG>
Package pdftex.def Info: dataset/imageClef/i/2/n01503061_12696.JPEG  used on input line 274.
(pdftex.def)             Requested size: 31.29819pt x 21.59575pt.
<dataset/imageClef/i/2/n01503061_14761.JPEG, id=378, 261.6174pt x 361.35pt>
File: dataset/imageClef/i/2/n01503061_14761.JPEG Graphic file (type jpg)
<use dataset/imageClef/i/2/n01503061_14761.JPEG>
Package pdftex.def Info: dataset/imageClef/i/2/n01503061_14761.JPEG  used on input line 274.
(pdftex.def)             Requested size: 22.65833pt x 31.29604pt.
<dataset/imageClef/i/2/n01503061_3094.JPEG, id=379, 451.6875pt x 339.2675pt>
File: dataset/imageClef/i/2/n01503061_3094.JPEG Graphic file (type jpg)
<use dataset/imageClef/i/2/n01503061_3094.JPEG>
Package pdftex.def Info: dataset/imageClef/i/2/n01503061_3094.JPEG  used on input line 274.
(pdftex.def)             Requested size: 31.29741pt x 23.50783pt.


LaTeX Warning: No positions in optional float specifier.
               Default added (so using `htbp') on input line 280.

<dataset/Office-Home/Art/calculator/00001.jpg, id=380, 1195.46625pt x 672.5125pt>
File: dataset/Office-Home/Art/calculator/00001.jpg Graphic file (type jpg)
<use dataset/Office-Home/Art/calculator/00001.jpg>
Package pdftex.def Info: dataset/Office-Home/Art/calculator/00001.jpg  used on input line 315.
(pdftex.def)             Requested size: 31.28386pt x 17.59882pt.
<dataset/Office-Home/Art/calculator/00004.jpg, id=381, 903.375pt x 677.53125pt>
File: dataset/Office-Home/Art/calculator/00004.jpg Graphic file (type jpg)
<use dataset/Office-Home/Art/calculator/00004.jpg>
Package pdftex.def Info: dataset/Office-Home/Art/calculator/00004.jpg  used on input line 315.
(pdftex.def)             Requested size: 31.29053pt x 23.4679pt.
<dataset/Office-Home/Art/calculator/00006.jpg, id=382, 642.4pt x 481.8pt>
File: dataset/Office-Home/Art/calculator/00006.jpg Graphic file (type jpg)
<use dataset/Office-Home/Art/calculator/00006.jpg>
Package pdftex.def Info: dataset/Office-Home/Art/calculator/00006.jpg  used on input line 315.
(pdftex.def)             Requested size: 31.28868pt x 23.4665pt.
<dataset/Office-Home/Real_World/calculator/00001.jpg, id=383, 120.45pt x 120.45pt>
File: dataset/Office-Home/Real_World/calculator/00001.jpg Graphic file (type jpg)
<use dataset/Office-Home/Real_World/calculator/00001.jpg>
Package pdftex.def Info: dataset/Office-Home/Real_World/calculator/00001.jpg  used on input line 315.
(pdftex.def)             Requested size: 31.29787pt x 31.29787pt.
<dataset/Office-Home/Real_World/calculator/00002.jpg, id=384, 220.825pt x 294.09875pt>
File: dataset/Office-Home/Real_World/calculator/00002.jpg Graphic file (type jpg)
<use dataset/Office-Home/Real_World/calculator/00002.jpg>
Package pdftex.def Info: dataset/Office-Home/Real_World/calculator/00002.jpg  used on input line 315.
(pdftex.def)             Requested size: 23.49898pt x 31.29637pt.
<dataset/Office-Home/Real_World/calculator/00003.jpg, id=385, 2007.5pt x 2007.5pt>
File: dataset/Office-Home/Real_World/calculator/00003.jpg Graphic file (type jpg)
<use dataset/Office-Home/Real_World/calculator/00003.jpg>
Package pdftex.def Info: dataset/Office-Home/Real_World/calculator/00003.jpg  used on input line 315.
(pdftex.def)             Requested size: 31.2752pt x 31.2752pt.
<dataset/Office-Home/Product/calculator/00013.jpg, id=386, 360.34625pt x 501.875pt>
File: dataset/Office-Home/Product/calculator/00013.jpg Graphic file (type jpg)
<use dataset/Office-Home/Product/calculator/00013.jpg>
Package pdftex.def Info: dataset/Office-Home/Product/calculator/00013.jpg  used on input line 315.
(pdftex.def)             Requested size: 22.47209pt x 31.29819pt.
<dataset/Office-Home/Product/calculator/00022.jpg, id=387, 501.875pt x 501.875pt>
File: dataset/Office-Home/Product/calculator/00022.jpg Graphic file (type jpg)
<use dataset/Office-Home/Product/calculator/00022.jpg>
Package pdftex.def Info: dataset/Office-Home/Product/calculator/00022.jpg  used on input line 315.
(pdftex.def)             Requested size: 31.29819pt x 31.29819pt.
<dataset/Office-Home/Product/calculator/00041.jpg, id=388, 189.70876pt x 501.875pt>
File: dataset/Office-Home/Product/calculator/00041.jpg Graphic file (type jpg)
<use dataset/Office-Home/Product/calculator/00041.jpg>
Package pdftex.def Info: dataset/Office-Home/Product/calculator/00041.jpg  used on input line 315.
(pdftex.def)             Requested size: 11.8307pt x 31.29819pt.
<dataset/Office-Home/Art/helmet/00053.jpg, id=389, 803.0pt x 601.24625pt>
File: dataset/Office-Home/Art/helmet/00053.jpg Graphic file (type jpg)
<use dataset/Office-Home/Art/helmet/00053.jpg>
Package pdftex.def Info: dataset/Office-Home/Art/helmet/00053.jpg  used on input line 315.
(pdftex.def)             Requested size: 31.2936pt x 23.43108pt.
<dataset/Office-Home/Art/helmet/00073.jpg, id=390, 793.96625pt x 1013.7875pt>
File: dataset/Office-Home/Art/helmet/00073.jpg Graphic file (type jpg)
<use dataset/Office-Home/Art/helmet/00073.jpg>
Package pdftex.def Info: dataset/Office-Home/Art/helmet/00073.jpg  used on input line 315.
(pdftex.def)             Requested size: 24.5085pt x 31.29405pt.
<dataset/Office-Home/Art/helmet/00079.jpg, id=391, 903.375pt x 858.20625pt>
File: dataset/Office-Home/Art/helmet/00079.jpg Graphic file (type jpg)
<use dataset/Office-Home/Art/helmet/00079.jpg>
Package pdftex.def Info: dataset/Office-Home/Art/helmet/00079.jpg  used on input line 315.
(pdftex.def)             Requested size: 31.29053pt x 29.726pt.
<dataset/Office-Home/Real_World/helmet/00010.jpg, id=392, 1027.84pt x 770.88pt>
File: dataset/Office-Home/Real_World/helmet/00010.jpg Graphic file (type jpg)
<use dataset/Office-Home/Real_World/helmet/00010.jpg>
Package pdftex.def Info: dataset/Office-Home/Real_World/helmet/00010.jpg  used on input line 315.
(pdftex.def)             Requested size: 31.28868pt x 23.4665pt.
<dataset/Office-Home/Real_World/helmet/00025.jpg, id=393, 1076.02pt x 1313.90875pt>
File: dataset/Office-Home/Real_World/helmet/00025.jpg Graphic file (type jpg)
<use dataset/Office-Home/Real_World/helmet/00025.jpg>
Package pdftex.def Info: dataset/Office-Home/Real_World/helmet/00025.jpg  used on input line 315.
(pdftex.def)             Requested size: 25.62962pt x 31.29587pt.
<dataset/Office-Home/Real_World/helmet/00033.jpg, id=394, 642.4pt x 481.8pt>
File: dataset/Office-Home/Real_World/helmet/00033.jpg Graphic file (type jpg)
<use dataset/Office-Home/Real_World/helmet/00033.jpg>
Package pdftex.def Info: dataset/Office-Home/Real_World/helmet/00033.jpg  used on input line 315.
(pdftex.def)             Requested size: 31.28868pt x 23.4665pt.
<dataset/Office-Home/Product/helmet/00001.jpg, id=395, 501.875pt x 453.695pt>
File: dataset/Office-Home/Product/helmet/00001.jpg Graphic file (type jpg)
<use dataset/Office-Home/Product/helmet/00001.jpg>
Package pdftex.def Info: dataset/Office-Home/Product/helmet/00001.jpg  used on input line 315.
(pdftex.def)             Requested size: 31.29819pt x 28.29355pt.
<dataset/Office-Home/Product/helmet/00002.jpg, id=396, 483.8075pt x 501.875pt>
File: dataset/Office-Home/Product/helmet/00002.jpg Graphic file (type jpg)
<use dataset/Office-Home/Product/helmet/00002.jpg>
Package pdftex.def Info: dataset/Office-Home/Product/helmet/00002.jpg  used on input line 315.
(pdftex.def)             Requested size: 30.17145pt x 31.29819pt.
<dataset/Office-Home/Product/helmet/00035.jpg, id=397, 501.875pt x 501.875pt>
File: dataset/Office-Home/Product/helmet/00035.jpg Graphic file (type jpg)
<use dataset/Office-Home/Product/helmet/00035.jpg>
Package pdftex.def Info: dataset/Office-Home/Product/helmet/00035.jpg  used on input line 315.
(pdftex.def)             Requested size: 31.29819pt x 31.29819pt.
<dataset/Office-Home/Art/candles/00064.jpg, id=398, 748.7975pt x 1075.01625pt>
File: dataset/Office-Home/Art/candles/00064.jpg Graphic file (type jpg)
<use dataset/Office-Home/Art/candles/00064.jpg>
Package pdftex.def Info: dataset/Office-Home/Art/candles/00064.jpg  used on input line 315.
(pdftex.def)             Requested size: 21.80026pt x 31.2977pt.
<dataset/Office-Home/Art/candles/00065.jpg, id=399, 983.675pt x 818.05624pt>
File: dataset/Office-Home/Art/candles/00065.jpg Graphic file (type jpg)
<use dataset/Office-Home/Art/candles/00065.jpg>
Package pdftex.def Info: dataset/Office-Home/Art/candles/00065.jpg  used on input line 315.
(pdftex.def)             Requested size: 31.29512pt x 26.02605pt.
<dataset/Office-Home/Art/candles/00068.jpg, id=400, 803.0pt x 1049.9225pt>
File: dataset/Office-Home/Art/candles/00068.jpg Graphic file (type jpg)
<use dataset/Office-Home/Art/candles/00068.jpg>
Package pdftex.def Info: dataset/Office-Home/Art/candles/00068.jpg  used on input line 315.
(pdftex.def)             Requested size: 23.92967pt x 31.28804pt.
<dataset/Office-Home/Real_World/candles/00068.jpg, id=401, 2858.68pt x 4288.02pt>
File: dataset/Office-Home/Real_World/candles/00068.jpg Graphic file (type jpg)
<use dataset/Office-Home/Real_World/candles/00068.jpg>
Package pdftex.def Info: dataset/Office-Home/Real_World/candles/00068.jpg  used on input line 315.
(pdftex.def)             Requested size: 20.8503pt x 31.27545pt.
<dataset/Office-Home/Real_World/candles/00074.jpg, id=402, 1606.0pt x 1204.5pt>
File: dataset/Office-Home/Real_World/candles/00074.jpg Graphic file (type jpg)
<use dataset/Office-Home/Real_World/candles/00074.jpg>
Package pdftex.def Info: dataset/Office-Home/Real_World/candles/00074.jpg  used on input line 315.
(pdftex.def)             Requested size: 31.2936pt x 23.47018pt.
<dataset/Office-Home/Real_World/candles/00097.jpg, id=403, 3011.25pt x 2003.485pt>
File: dataset/Office-Home/Real_World/candles/00097.jpg Graphic file (type jpg)
<use dataset/Office-Home/Real_World/candles/00097.jpg>
Package pdftex.def Info: dataset/Office-Home/Real_World/candles/00097.jpg  used on input line 315.
(pdftex.def)             Requested size: 31.29053pt x 20.81862pt.
<dataset/Office-Home/Product/candles/00001.jpg, id=404, 399.4925pt x 501.875pt>
File: dataset/Office-Home/Product/candles/00001.jpg Graphic file (type jpg)
<use dataset/Office-Home/Product/candles/00001.jpg>
Package pdftex.def Info: dataset/Office-Home/Product/candles/00001.jpg  used on input line 315.
(pdftex.def)             Requested size: 24.91335pt x 31.29819pt.
<dataset/Office-Home/Product/candles/00002.jpg, id=405, 501.875pt x 501.875pt>
File: dataset/Office-Home/Product/candles/00002.jpg Graphic file (type jpg)
<use dataset/Office-Home/Product/candles/00002.jpg>
Package pdftex.def Info: dataset/Office-Home/Product/candles/00002.jpg  used on input line 315.
(pdftex.def)             Requested size: 31.29819pt x 31.29819pt.
<dataset/Office-Home/Product/candles/00053.jpg, id=406, 362.35374pt x 501.875pt>
File: dataset/Office-Home/Product/candles/00053.jpg Graphic file (type jpg)
<use dataset/Office-Home/Product/candles/00053.jpg>
Package pdftex.def Info: dataset/Office-Home/Product/candles/00053.jpg  used on input line 315.
(pdftex.def)             Requested size: 22.59729pt x 31.29819pt.

LaTeX Warning: No positions in optional float specifier.
               Default added (so using `htbp') on input line 319.

<dataset/visda/synthetic/aeroplane/src_1_02691156_1b0b1d2cb9f9d5c0575bd26acccafabd__10_236_150.png, id=407, 224.84pt x 224.84pt>
File: dataset/visda/synthetic/aeroplane/src_1_02691156_1b0b1d2cb9f9d5c0575bd26acccafabd__10_236_150.png Graphic file (type png)
<use dataset/visda/synthetic/aeroplane/src_1_02691156_1b0b1d2cb9f9d5c0575bd26acccafabd__10_236_150.png>
Package pdftex.def Info: dataset/visda/synthetic/aeroplane/src_1_02691156_1b0b1d2cb9f9d5c0575bd26acccafabd__10_236_150.png  used on input line 345.
(pdftex.def)             Requested size: 31.29555pt x 31.29555pt.
<dataset/visda/synthetic/aeroplane/src_1_02691156_1b0b1d2cb9f9d5c0575bd26acccafabd__44_236_150.png, id=408, 224.84pt x 224.84pt>
File: dataset/visda/synthetic/aeroplane/src_1_02691156_1b0b1d2cb9f9d5c0575bd26acccafabd__44_236_150.png Graphic file (type png)
<use dataset/visda/synthetic/aeroplane/src_1_02691156_1b0b1d2cb9f9d5c0575bd26acccafabd__44_236_150.png>
Package pdftex.def Info: dataset/visda/synthetic/aeroplane/src_1_02691156_1b0b1d2cb9f9d5c0575bd26acccafabd__44_236_150.png  used on input line 345.
(pdftex.def)             Requested size: 31.29555pt x 31.29555pt.
<dataset/visda/synthetic/aeroplane/src_1_02691156_1b0b1d2cb9f9d5c0575bd26acccafabd__78_349_150.png, id=409, 224.84pt x 224.84pt>
File: dataset/visda/synthetic/aeroplane/src_1_02691156_1b0b1d2cb9f9d5c0575bd26acccafabd__78_349_150.png Graphic file (type png)
<use dataset/visda/synthetic/aeroplane/src_1_02691156_1b0b1d2cb9f9d5c0575bd26acccafabd__78_349_150.png>
Package pdftex.def Info: dataset/visda/synthetic/aeroplane/src_1_02691156_1b0b1d2cb9f9d5c0575bd26acccafabd__78_349_150.png  used on input line 345.
(pdftex.def)             Requested size: 31.29555pt x 31.29555pt.
<dataset/visda/real/aeroplane/aeroplane_156302.jpg, id=410, 224.84pt x 224.84pt>
File: dataset/visda/real/aeroplane/aeroplane_156302.jpg Graphic file (type jpg)
<use dataset/visda/real/aeroplane/aeroplane_156302.jpg>
Package pdftex.def Info: dataset/visda/real/aeroplane/aeroplane_156302.jpg  used on input line 345.
(pdftex.def)             Requested size: 31.29555pt x 31.29555pt.
<dataset/visda/real/aeroplane/aeroplane_156317.jpg, id=411, 224.84pt x 224.84pt>
File: dataset/visda/real/aeroplane/aeroplane_156317.jpg Graphic file (type jpg)
<use dataset/visda/real/aeroplane/aeroplane_156317.jpg>
Package pdftex.def Info: dataset/visda/real/aeroplane/aeroplane_156317.jpg  used on input line 345.
(pdftex.def)             Requested size: 31.29555pt x 31.29555pt.
<dataset/visda/real/aeroplane/aeroplane_156332.jpg, id=412, 224.84pt x 224.84pt>
File: dataset/visda/real/aeroplane/aeroplane_156332.jpg Graphic file (type jpg)
<use dataset/visda/real/aeroplane/aeroplane_156332.jpg>
Package pdftex.def Info: dataset/visda/real/aeroplane/aeroplane_156332.jpg  used on input line 345.
(pdftex.def)             Requested size: 31.29555pt x 31.29555pt.
<dataset/visda/synthetic/car/src_1_02958343_1abeca7159db7ed9f200a72c9245aee7__10_349_150.png, id=413, 224.84pt x 224.84pt>
File: dataset/visda/synthetic/car/src_1_02958343_1abeca7159db7ed9f200a72c9245aee7__10_349_150.png Graphic file (type png)
<use dataset/visda/synthetic/car/src_1_02958343_1abeca7159db7ed9f200a72c9245aee7__10_349_150.png>
Package pdftex.def Info: dataset/visda/synthetic/car/src_1_02958343_1abeca7159db7ed9f200a72c9245aee7__10_349_150.png  used on input line 345.
(pdftex.def)             Requested size: 31.29555pt x 31.29555pt.
<dataset/visda/synthetic/car/src_1_02958343_1abeca7159db7ed9f200a72c9245aee7__44_10_150.png, id=414, 224.84pt x 224.84pt>
File: dataset/visda/synthetic/car/src_1_02958343_1abeca7159db7ed9f200a72c9245aee7__44_10_150.png Graphic file (type png)
<use dataset/visda/synthetic/car/src_1_02958343_1abeca7159db7ed9f200a72c9245aee7__44_10_150.png>
Package pdftex.def Info: dataset/visda/synthetic/car/src_1_02958343_1abeca7159db7ed9f200a72c9245aee7__44_10_150.png  used on input line 345.
(pdftex.def)             Requested size: 31.29555pt x 31.29555pt.
<dataset/visda/synthetic/car/src_1_02958343_1abeca7159db7ed9f200a72c9245aee7__61_123_165.png, id=415, 224.84pt x 224.84pt>
File: dataset/visda/synthetic/car/src_1_02958343_1abeca7159db7ed9f200a72c9245aee7__61_123_165.png Graphic file (type png)
<use dataset/visda/synthetic/car/src_1_02958343_1abeca7159db7ed9f200a72c9245aee7__61_123_165.png>
Package pdftex.def Info: dataset/visda/synthetic/car/src_1_02958343_1abeca7159db7ed9f200a72c9245aee7__61_123_165.png  used on input line 345.
(pdftex.def)             Requested size: 31.29555pt x 31.29555pt.
<dataset/visda/real/car/car_131741.jpg, id=416, 224.84pt x 224.84pt>
File: dataset/visda/real/car/car_131741.jpg Graphic file (type jpg)
<use dataset/visda/real/car/car_131741.jpg>
Package pdftex.def Info: dataset/visda/real/car/car_131741.jpg  used on input line 345.
(pdftex.def)             Requested size: 31.29555pt x 31.29555pt.
<dataset/visda/real/car/car_131760.jpg, id=417, 224.84pt x 224.84pt>
File: dataset/visda/real/car/car_131760.jpg Graphic file (type jpg)
<use dataset/visda/real/car/car_131760.jpg>
Package pdftex.def Info: dataset/visda/real/car/car_131760.jpg  used on input line 345.
(pdftex.def)             Requested size: 31.29555pt x 31.29555pt.
<dataset/visda/real/car/car_131776.jpg, id=418, 224.84pt x 224.84pt>
File: dataset/visda/real/car/car_131776.jpg Graphic file (type jpg)
<use dataset/visda/real/car/car_131776.jpg>
Package pdftex.def Info: dataset/visda/real/car/car_131776.jpg  used on input line 345.
(pdftex.def)             Requested size: 31.29555pt x 31.29555pt.
<dataset/visda/synthetic/horse/src_3_1511__27_123_165.png, id=419, 224.84pt x 224.84pt>
File: dataset/visda/synthetic/horse/src_3_1511__27_123_165.png Graphic file (type png)
<use dataset/visda/synthetic/horse/src_3_1511__27_123_165.png>
Package pdftex.def Info: dataset/visda/synthetic/horse/src_3_1511__27_123_165.png  used on input line 345.
(pdftex.def)             Requested size: 31.29555pt x 31.29555pt.
<dataset/visda/synthetic/horse/src_3_1511__44_236_150.png, id=420, 224.84pt x 224.84pt>
File: dataset/visda/synthetic/horse/src_3_1511__44_236_150.png Graphic file (type png)
<use dataset/visda/synthetic/horse/src_3_1511__44_236_150.png>
Package pdftex.def Info: dataset/visda/synthetic/horse/src_3_1511__44_236_150.png  used on input line 345.
(pdftex.def)             Requested size: 31.29555pt x 31.29555pt.
<dataset/visda/synthetic/horse/src_3_1511__78_236_150.png, id=421, 224.84pt x 224.84pt>
File: dataset/visda/synthetic/horse/src_3_1511__78_236_150.png Graphic file (type png)
<use dataset/visda/synthetic/horse/src_3_1511__78_236_150.png>
Package pdftex.def Info: dataset/visda/synthetic/horse/src_3_1511__78_236_150.png  used on input line 345.
(pdftex.def)             Requested size: 31.29555pt x 31.29555pt.
<dataset/visda/real/horse/horse_53418.jpg, id=422, 224.84pt x 224.84pt>
File: dataset/visda/real/horse/horse_53418.jpg Graphic file (type jpg)
<use dataset/visda/real/horse/horse_53418.jpg>
Package pdftex.def Info: dataset/visda/real/horse/horse_53418.jpg  used on input line 345.
(pdftex.def)             Requested size: 31.29555pt x 31.29555pt.
<dataset/visda/real/horse/horse_53430.jpg, id=423, 224.84pt x 224.84pt>
File: dataset/visda/real/horse/horse_53430.jpg Graphic file (type jpg)
<use dataset/visda/real/horse/horse_53430.jpg>
Package pdftex.def Info: dataset/visda/real/horse/horse_53430.jpg  used on input line 345.
(pdftex.def)             Requested size: 31.29555pt x 31.29555pt.
<dataset/visda/real/horse/horse_53455.jpg, id=424, 224.84pt x 224.84pt>
File: dataset/visda/real/horse/horse_53455.jpg Graphic file (type jpg)
<use dataset/visda/real/horse/horse_53455.jpg>
Package pdftex.def Info: dataset/visda/real/horse/horse_53455.jpg  used on input line 345.
(pdftex.def)             Requested size: 31.29555pt x 31.29555pt.
[8 <c:/Users/chris/Documents/Paper/Accepted/2020_ACCV_ASAN/0543-supp/dataset/Office-31/amazon/back_back/frame_0001.jpg> <c:/Users/chris/Documents/Paper/Accepted/2020_ACCV_ASAN/0543-supp/dataset/Office-31/amazon/back_back/frame_0002.jpg> <c:/Users/chris/Documents/Paper/Accepted/2020_ACCV_ASAN/0543-supp/dataset/Office-31/amazon/back_back/frame_0003.jpg> <c:/Users/chris/Documents/Paper/Accepted/2020_ACCV_ASAN/0543-supp/dataset/Office-31/dslr/back_pack/frame_0001.jpg> <c:/Users/chris/Documents/Paper/Accepted/2020_ACCV_ASAN/0543-supp/dataset/Office-31/dslr/back_pack/frame_0008.jpg> <c:/Users/chris/Documents/Paper/Accepted/2020_ACCV_ASAN/0543-supp/dataset/Office-31/dslr/back_pack/frame_0012.jpg> <c:/Users/chris/Documents/Paper/Accepted/2020_ACCV_ASAN/0543-supp/dataset/Office-31/webcam/back_pack/frame_0007.jpg> <c:/Users/chris/Documents/Paper/Accepted/2020_ACCV_ASAN/0543-supp/dataset/Office-31/webcam/back_pack/frame_0018.jpg> <c:/Users/chris/Documents/Paper/Accepted/2020_ACCV_ASAN/0543-supp/dataset/Office-31/webcam/back_pack/frame_0026.jpg> <c:/Users/chris/Documents/Paper/Accepted/2020_ACCV_ASAN/0543-supp/dataset/Office-31/amazon/bike/frame_0001.jpg> <c:/Users/chris/Documents/Paper/Accepted/2020_ACCV_ASAN/0543-supp/dataset/Office-31/amazon/bike/frame_0002.jpg> <c:/Users/chris/Documents/Paper/Accepted/2020_ACCV_ASAN/0543-supp/dataset/Office-31/amazon/bike/frame_0003.jpg> <c:/Users/chris/Documents/Paper/Accepted/2020_ACCV_ASAN/0543-supp/dataset/Office-31/dslr/bike/frame_0001.jpg> <c:/Users/chris/Documents/Paper/Accepted/2020_ACCV_ASAN/0543-supp/dataset/Office-31/dslr/bike/frame_0008.jpg> <c:/Users/chris/Documents/Paper/Accepted/2020_ACCV_ASAN/0543-supp/dataset/Office-31/dslr/bike/frame_0009.jpg> <c:/Users/chris/Documents/Paper/Accepted/2020_ACCV_ASAN/0543-supp/dataset/Office-31/webcam/bike/frame_0002.jpg> <c:/Users/chris/Documents/Paper/Accepted/2020_ACCV_ASAN/0543-supp/dataset/Office-31/webcam/bike/frame_0003.jpg> <c:/Users/chris/Documents/Paper/Accepted/2020_ACCV_ASAN/0543-supp/dataset/Office-31/webcam/bike/frame_0010.jpg> <c:/Users/chris/Documents/Paper/Accepted/2020_ACCV_ASAN/0543-supp/dataset/Office-31/amazon/desk_lamp/frame_0001.jpg> <c:/Users/chris/Documents/Paper/Accepted/2020_ACCV_ASAN/0543-supp/dataset/Office-31/amazon/desk_lamp/frame_0002.jpg> <c:/Users/chris/Documents/Paper/Accepted/2020_ACCV_ASAN/0543-supp/dataset/Office-31/dslr/desk_lamp/frame_0004.jpg> <c:/Users/chris/Documents/Paper/Accepted/2020_ACCV_ASAN/0543-supp/dataset/Office-31/dslr/desk_lamp/frame_0006.jpg> <c:/Users/chris/Documents/Paper/Accepted/2020_ACCV_ASAN/0543-supp/dataset/Office-31/dslr/desk_lamp/frame_0010.jpg> <c:/Users/chris/Documents/Paper/Accepted/2020_ACCV_ASAN/0543-supp/dataset/Office-31/webcam/desk_lamp/frame_0006.jpg> <c:/Users/chris/Documents/Paper/Accepted/2020_ACCV_ASAN/0543-supp/dataset/Office-31/webcam/desk_lamp/frame_0008.jpg> <c:/Users/chris/Documents/Paper/Accepted/2020_ACCV_ASAN/0543-supp/dataset/Office-31/webcam/desk_lamp/frame_0012.jpg> <c:/Users/chris/Documents/Paper/Accepted/2020_ACCV_ASAN/0543-supp/dataset/imageClef/c/0/251_0023.jpg> <c:/Users/chris/Documents/Paper/Accepted/2020_ACCV_ASAN/0543-supp/dataset/imageClef/c/0/251_0090.jpg> <c:/Users/chris/Documents/Paper/Accepted/2020_ACCV_ASAN/0543-supp/dataset/imageClef/c/0/251_0115.jpg> <c:/Users/chris/Documents/Paper/Accepted/2020_ACCV_ASAN/0543-supp/dataset/imageClef/p/0/2008_005905.jpg> <c:/Users/chris/Documents/Paper/Accepted/2020_ACCV_ASAN/0543-supp/dataset/imageClef/p/0/2011_002751.jpg> <c:/Users/chris/Documents/Paper/Accepted/2020_ACCV_ASAN/0543-supp/dataset/imageClef/p/0/2011_002993.jpg> <c:/Users/chris/Documents/Paper/Accepted/2020_ACCV_ASAN/0543-supp/dataset/imageClef/i/0/n02691156_11729.JPEG> <c:/Users/chris/Documents/Paper/Accepted/2020_ACCV_ASAN/0543-supp/dataset/imageClef/i/0/n02691156_1806.JPEG> <c:/Users/chris/Documents/Paper/Accepted/2020_ACCV_ASAN/0543-supp/dataset/imageClef/i/0/n02691156_49198.JPEG> <c:/Users/chris/Documents/Paper/Accepted/2020_ACCV_ASAN/0543-supp/dataset/imageClef/c/1/224_0007.jpg> <c:/Users/chris/Documents/Paper/Accepted/2020_ACCV_ASAN/0543-supp/dataset/imageClef/c/1/224_0044.jpg> <c:/Users/chris/Documents/Paper/Accepted/2020_ACCV_ASAN/0543-supp/dataset/imageClef/c/1/224_0067.jpg> <c:/Users/chris/Documents/Paper/Accepted/2020_ACCV_ASAN/0543-supp/dataset/imageClef/p/1/2008_005175.jpg> <c:/Users/chris/Documents/Paper/Accepted/2020_ACCV_ASAN/0543-supp/dataset/imageClef/p/1/2008_007510.jpg> <c:/Users/chris/Documents/Paper/Accepted/2020_ACCV_ASAN/0543-supp/dataset/imageClef/p/1/2011_000087.jpg> <c:/Users/chris/Documents/Paper/Accepted/2020_ACCV_ASAN/0543-supp/dataset/imageClef/i/1/n02834778_2737.JPEG> <c:/Users/chris/Documents/Paper/Accepted/2020_ACCV_ASAN/0543-supp/dataset/imageClef/i/1/n02834778_763.JPEG> <c:/Users/chris/Documents/Paper/Accepted/2020_ACCV_ASAN/0543-supp/dataset/imageClef/i/1/n02834778_8949.JPEG> <c:/Users/chris/Documents/Paper/Accepted/2020_ACCV_ASAN/0543-supp/dataset/imageClef/c/2/113_0022.jpg> <c:/Users/chris/Documents/Paper/Accepted/2020_ACCV_ASAN/0543-supp/dataset/imageClef/c/2/113_0115.jpg> <c:/Users/chris/Documents/Paper/Accepted/2020_ACCV_ASAN/0543-supp/dataset/imageClef/c/2/113_0116.jpg> <c:/Users/chris/Documents/Paper/Accepted/2020_ACCV_ASAN/0543-supp/dataset/imageClef/p/2/2008_007003.jpg> <c:/Users/chris/Documents/Paper/Accepted/2020_ACCV_ASAN/0543-supp/dataset/imageClef/p/2/2008_007486.jpg> <c:/Users/chris/Documents/Paper/Accepted/2020_ACCV_ASAN/0543-supp/dataset/imageClef/p/2/2009_003285.jpg> <c:/Users/chris/Documents/Paper/Accepted/2020_ACCV_ASAN/0543-supp/dataset/imageClef/i/2/n01503061_12696.JPEG> <c:/Users/chris/Documents/Paper/Accepted/2020_ACCV_ASAN/0543-supp/dataset/imageClef/i/2/n01503061_14761.JPEG> <c:/Users/chris/Documents/Paper/Accepted/2020_ACCV_ASAN/0543-supp/dataset/imageClef/i/2/n01503061_3094.JPEG>] [9 <c:/Users/chris/Documents/Paper/Accepted/2020_ACCV_ASAN/0543-supp/dataset/Office-Home/Art/calculator/00001.jpg> <c:/Users/chris/Documents/Paper/Accepted/2020_ACCV_ASAN/0543-supp/dataset/Office-Home/Art/calculator/00004.jpg> <c:/Users/chris/Documents/Paper/Accepted/2020_ACCV_ASAN/0543-supp/dataset/Office-Home/Art/calculator/00006.jpg> <c:/Users/chris/Documents/Paper/Accepted/2020_ACCV_ASAN/0543-supp/dataset/Office-Home/Real_World/calculator/00001.jpg> <c:/Users/chris/Documents/Paper/Accepted/2020_ACCV_ASAN/0543-supp/dataset/Office-Home/Real_World/calculator/00002.jpg> <c:/Users/chris/Documents/Paper/Accepted/2020_ACCV_ASAN/0543-supp/dataset/Office-Home/Real_World/calculator/00003.jpg> <c:/Users/chris/Documents/Paper/Accepted/2020_ACCV_ASAN/0543-supp/dataset/Office-Home/Product/calculator/00013.jpg> <c:/Users/chris/Documents/Paper/Accepted/2020_ACCV_ASAN/0543-supp/dataset/Office-Home/Product/calculator/00022.jpg> <c:/Users/chris/Documents/Paper/Accepted/2020_ACCV_ASAN/0543-supp/dataset/Office-Home/Product/calculator/00041.jpg> <c:/Users/chris/Documents/Paper/Accepted/2020_ACCV_ASAN/0543-supp/dataset/Office-Home/Art/helmet/00053.jpg> <c:/Users/chris/Documents/Paper/Accepted/2020_ACCV_ASAN/0543-supp/dataset/Office-Home/Art/helmet/00073.jpg> <c:/Users/chris/Documents/Paper/Accepted/2020_ACCV_ASAN/0543-supp/dataset/Office-Home/Art/helmet/00079.jpg> <c:/Users/chris/Documents/Paper/Accepted/2020_ACCV_ASAN/0543-supp/dataset/Office-Home/Real_World/helmet/00010.jpg> <c:/Users/chris/Documents/Paper/Accepted/2020_ACCV_ASAN/0543-supp/dataset/Office-Home/Real_World/helmet/00025.jpg> <c:/Users/chris/Documents/Paper/Accepted/2020_ACCV_ASAN/0543-supp/dataset/Office-Home/Real_World/helmet/00033.jpg> <c:/Users/chris/Documents/Paper/Accepted/2020_ACCV_ASAN/0543-supp/dataset/Office-Home/Product/helmet/00001.jpg> <c:/Users/chris/Documents/Paper/Accepted/2020_ACCV_ASAN/0543-supp/dataset/Office-Home/Product/helmet/00002.jpg> <c:/Users/chris/Documents/Paper/Accepted/2020_ACCV_ASAN/0543-supp/dataset/Office-Home/Product/helmet/00035.jpg> <c:/Users/chris/Documents/Paper/Accepted/2020_ACCV_ASAN/0543-supp/dataset/Office-Home/Art/candles/00064.jpg> <c:/Users/chris/Documents/Paper/Accepted/2020_ACCV_ASAN/0543-supp/dataset/Office-Home/Art/candles/00065.jpg> <c:/Users/chris/Documents/Paper/Accepted/2020_ACCV_ASAN/0543-supp/dataset/Office-Home/Art/candles/00068.jpg> <c:/Users/chris/Documents/Paper/Accepted/2020_ACCV_ASAN/0543-supp/dataset/Office-Home/Real_World/candles/00068.jpg> <c:/Users/chris/Documents/Paper/Accepted/2020_ACCV_ASAN/0543-supp/dataset/Office-Home/Real_World/candles/00074.jpg> <c:/Users/chris/Documents/Paper/Accepted/2020_ACCV_ASAN/0543-supp/dataset/Office-Home/Real_World/candles/00097.jpg> <c:/Users/chris/Documents/Paper/Accepted/2020_ACCV_ASAN/0543-supp/dataset/Office-Home/Product/candles/00001.jpg> <c:/Users/chris/Documents/Paper/Accepted/2020_ACCV_ASAN/0543-supp/dataset/Office-Home/Product/candles/00002.jpg> <c:/Users/chris/Documents/Paper/Accepted/2020_ACCV_ASAN/0543-supp/dataset/Office-Home/Product/candles/00053.jpg> <c:/Users/chris/Documents/Paper/Accepted/2020_ACCV_ASAN/0543-supp/dataset/visda/synthetic/aeroplane/src_1_02691156_1b0b1d2cb9f9d5c0575bd26acccafabd__10_236_150.png> <c:/Users/chris/Documents/Paper/Accepted/2020_ACCV_ASAN/0543-supp/dataset/visda/synthetic/aeroplane/src_1_02691156_1b0b1d2cb9f9d5c0575bd26acccafabd__44_236_150.png> <c:/Users/chris/Documents/Paper/Accepted/2020_ACCV_ASAN/0543-supp/dataset/visda/synthetic/aeroplane/src_1_02691156_1b0b1d2cb9f9d5c0575bd26acccafabd__78_349_150.png> <c:/Users/chris/Documents/Paper/Accepted/2020_ACCV_ASAN/0543-supp/dataset/visda/real/aeroplane/aeroplane_156302.jpg> <c:/Users/chris/Documents/Paper/Accepted/2020_ACCV_ASAN/0543-supp/dataset/visda/real/aeroplane/aeroplane_156317.jpg> <c:/Users/chris/Documents/Paper/Accepted/2020_ACCV_ASAN/0543-supp/dataset/visda/real/aeroplane/aeroplane_156332.jpg> <c:/Users/chris/Documents/Paper/Accepted/2020_ACCV_ASAN/0543-supp/dataset/visda/synthetic/car/src_1_02958343_1abeca7159db7ed9f200a72c9245aee7__10_349_150.png> <c:/Users/chris/Documents/Paper/Accepted/2020_ACCV_ASAN/0543-supp/dataset/visda/synthetic/car/src_1_02
958343_1abeca7159db7ed9f200a72c9245aee7__44_10_150.png> <c:/Users/chris/Documents/Paper/Accepted/2020_ACCV_ASAN/0543-supp/dataset/visda/synthetic/car/src_1_02958343_1abeca7159db7ed9f200a72c9245aee7__61_123_165.png> <c:/Users/chris/Documents/Paper/Accepted/2020_ACCV_ASAN/0543-supp/dataset/visda/real/car/car_131741.jpg> <c:/Users/chris/Documents/Paper/Accepted/2020_ACCV_ASAN/0543-supp/dataset/visda/real/car/car_131760.jpg> <c:/Users/chris/Documents/Paper/Accepted/2020_ACCV_ASAN/0543-supp/dataset/visda/real/car/car_131776.jpg> <c:/Users/chris/Documents/Paper/Accepted/2020_ACCV_ASAN/0543-supp/dataset/visda/synthetic/horse/src_3_1511__27_123_165.png> <c:/Users/chris/Documents/Paper/Accepted/2020_ACCV_ASAN/0543-supp/dataset/visda/synthetic/horse/src_3_1511__44_236_150.png> <c:/Users/chris/Documents/Paper/Accepted/2020_ACCV_ASAN/0543-supp/dataset/visda/synthetic/horse/src_3_1511__78_236_150.png> <c:/Users/chris/Documents/Paper/Accepted/2020_ACCV_ASAN/0543-supp/dataset/visda/real/horse/horse_53418.jpg> <c:/Users/chris/Documents/Paper/Accepted/2020_ACCV_ASAN/0543-supp/dataset/visda/real/horse/horse_53430.jpg> <c:/Users/chris/Documents/Paper/Accepted/2020_ACCV_ASAN/0543-supp/dataset/visda/real/horse/horse_53455.jpg>] (c:/Users\chris\Documents\Paper\Accepted\2020_ACCV_ASAN\0543-supp\543-supp.bbl [10]) [11] (c:/Users\chris\Documents\Paper\Accepted\2020_ACCV_ASAN\0543-supp\543-supp.aux)

LaTeX Font Warning: Some font shapes were not available, defaults substituted.

 ) 
Here is how much of TeX's memory you used:
 5270 strings out of 493305
 95476 string characters out of 3129803
 147263 words of memory out of 3000000
 8608 multiletter control sequences out of 15000+200000
 11711 words of font info for 45 fonts, out of 3000000 for 9000
 1141 hyphenation exceptions out of 8191
 42i,14n,40p,1837b,512s stack positions out of 5000i,500n,10000p,200000b,50000s
<C:/Users/chris/AppData/Local/Programs/MiKTeX 2.9/fonts/type1/public/amsfonts/cm/cmbx10.pfb><C:/Users/chris/AppData/Local/Programs/MiKTeX 2.9/fonts/type1/public/amsfonts/cm/cmbx12.pfb><C:/Users/chris/AppData/Local/Programs/MiKTeX 2.9/fonts/type1/public/amsfonts/cm/cmbx9.pfb><C:/Users/chris/AppData/Local/Programs/MiKTeX 2.9/fonts/type1/public/amsfonts/cm/cmmi10.pfb><C:/Users/chris/AppData/Local/Programs/MiKTeX 2.9/fonts/type1/public/amsfonts/cm/cmmi6.pfb><C:/Users/chris/AppData/Local/Programs/MiKTeX 2.9/fonts/type1/public/amsfonts/cm/cmmi7.pfb><C:/Users/chris/AppData/Local/Programs/MiKTeX 2.9/fonts/type1/public/amsfonts/cm/cmr10.pfb><C:/Users/chris/AppData/Local/Programs/MiKTeX 2.9/fonts/type1/public/amsfonts/cm/cmr7.pfb><C:/Users/chris/AppData/Local/Programs/MiKTeX 2.9/fonts/type1/public/amsfonts/cm/cmr9.pfb><C:/Users/chris/AppData/Local/Programs/MiKTeX 2.9/fonts/type1/public/amsfonts/cm/cmsy10.pfb><C:/Users/chris/AppData/Local/Programs/MiKTeX 2.9/fonts/type1/public/amsfonts/cm/cmsy7.pfb><C:/Users/chris/AppData/Local/Programs/MiKTeX 2.9/fonts/type1/public/amsfonts/cm/cmsy9.pfb><C:/Users/chris/AppData/Local/Programs/MiKTeX 2.9/fonts/type1/public/amsfonts/cm/cmti10.pfb><C:/Users/chris/AppData/Local/Programs/MiKTeX 2.9/fonts/type1/public/amsfonts/cm/cmtt9.pfb>
Output written on c:/Users\chris\Documents\Paper\Accepted\2020_ACCV_ASAN\0543-supp\543-supp.pdf (11 pages, 6183557 bytes).
PDF statistics:
 481 PDF objects out of 1000 (max. 8388607)
 0 named destinations out of 1000 (max. 500000)
 556 words of extra memory for PDF output out of 10000 (max. 10000000)
