# Supplementary material (part 1 of 2)
Source: ML conference proceedings conference paper supplement (https://openaccess.thecvf.com/content/ACCV2020/html/Raab_Bridging_Adversarial_and_ACCV_2020_paper.html)

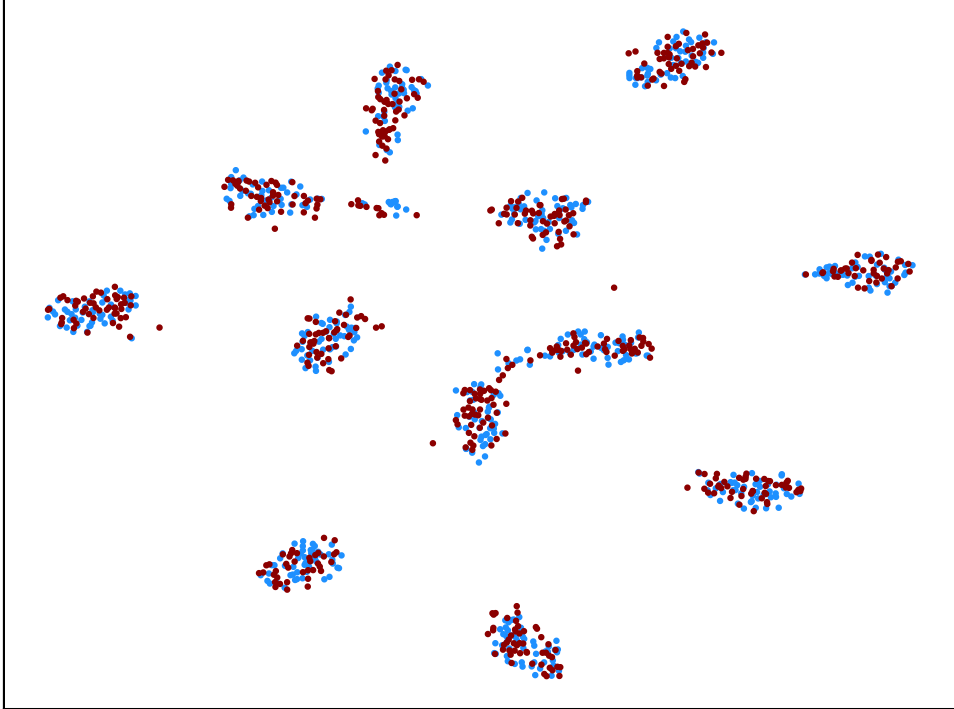

Supplement: Supplementary file 2 [file Raab_Bridging_Adversarial_and_ACCV_2020_supplemental.zip]

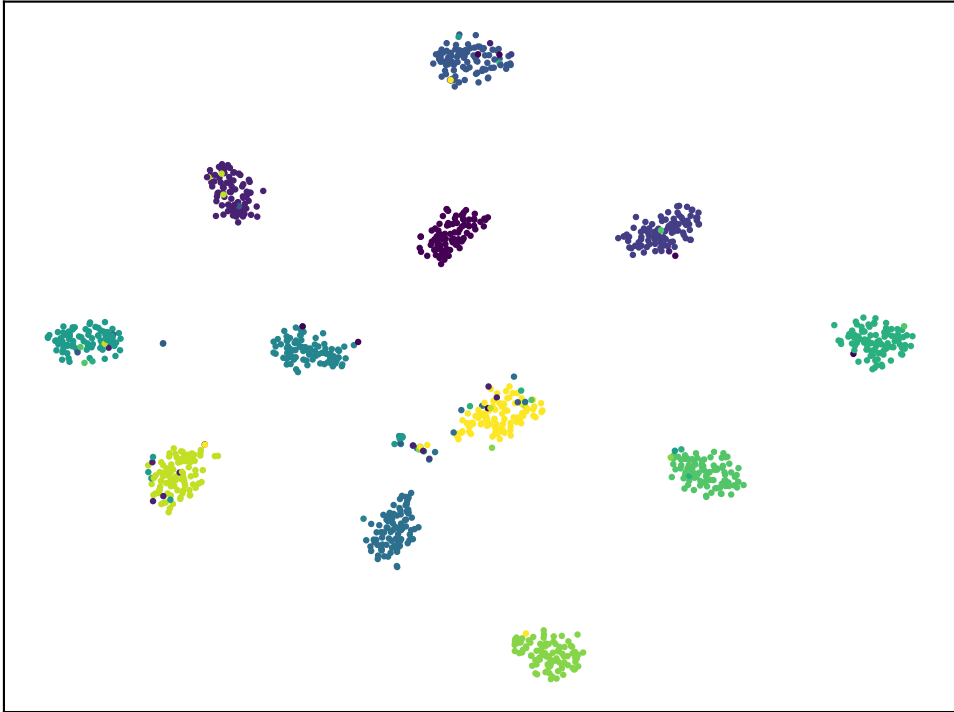

Supplement: Supplementary file 3 [file Raab_Bridging_Adversarial_and_ACCV_2020_supplemental.zip]

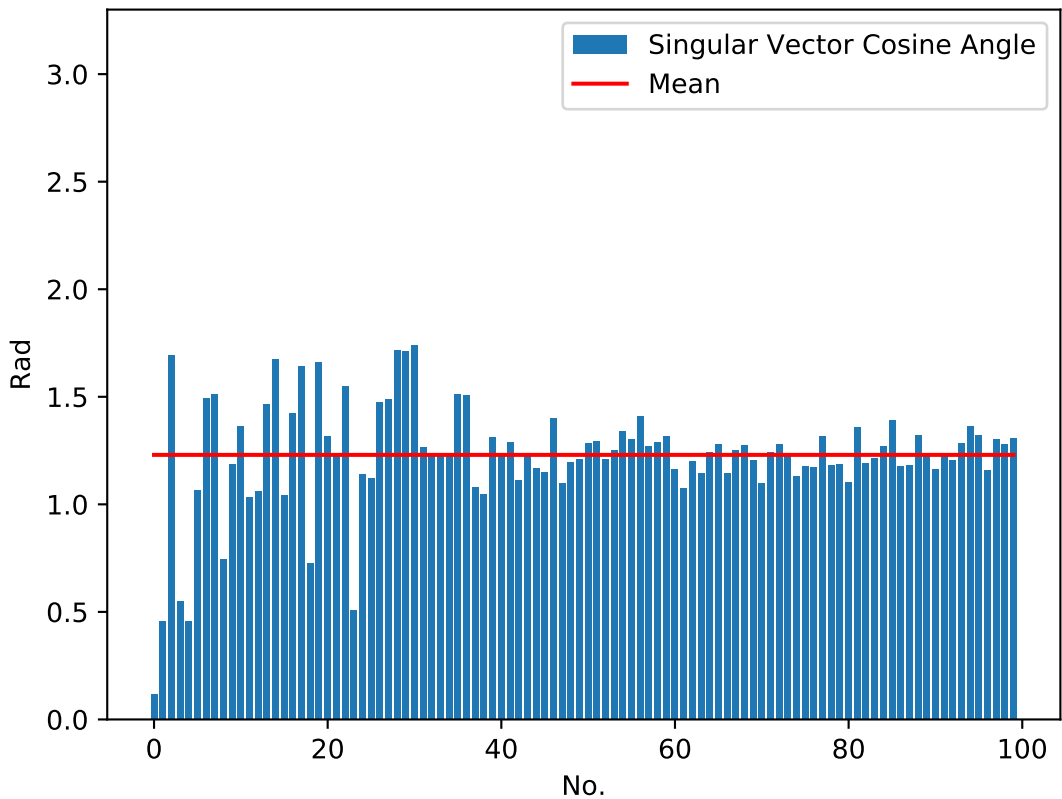

Supplement: Supplementary file 4 [file Raab_Bridging_Adversarial_and_ACCV_2020_supplemental.zip]

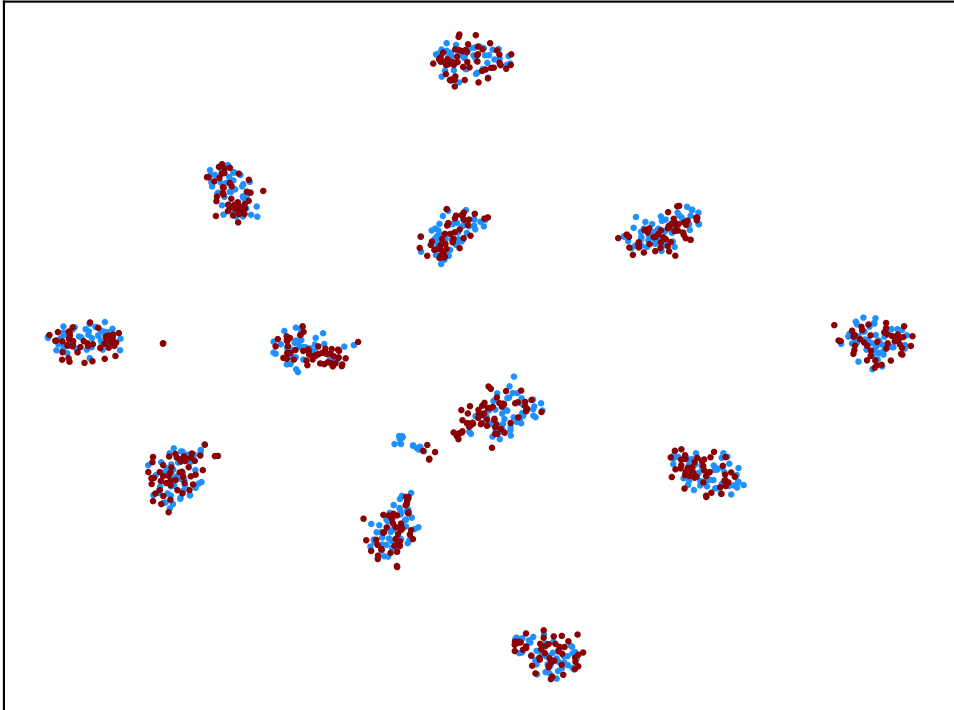

Supplement: Supplementary file 5 [file Raab_Bridging_Adversarial_and_ACCV_2020_supplemental.zip]

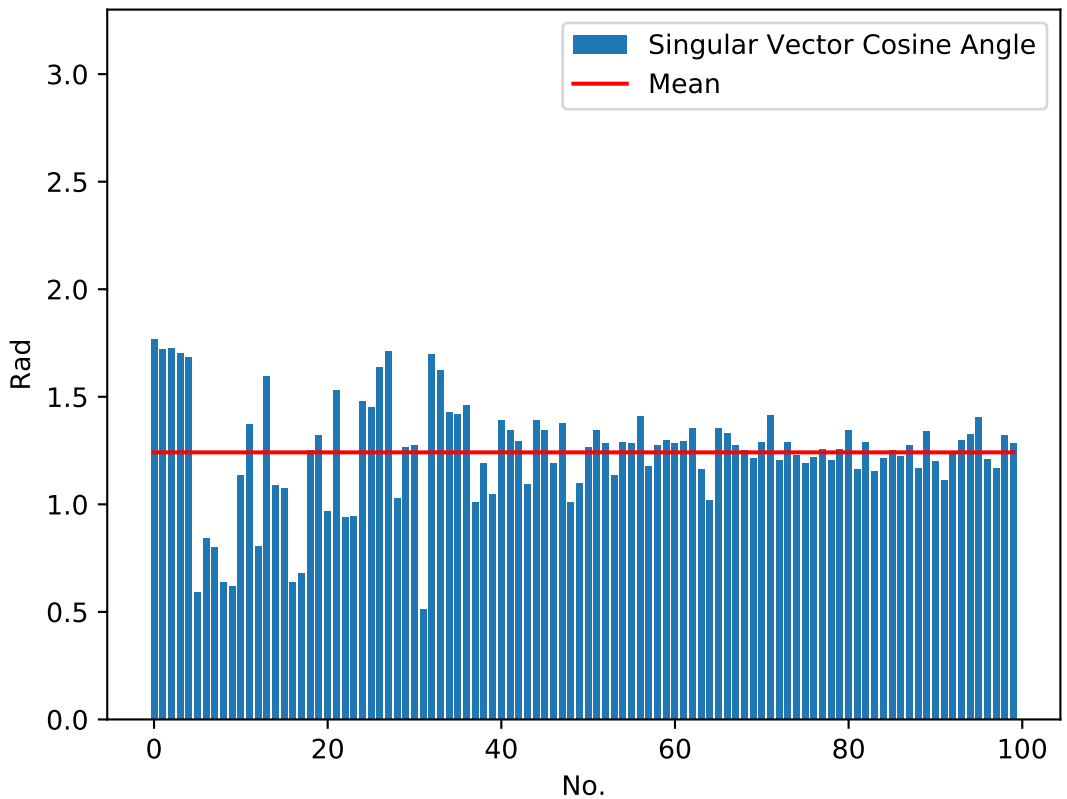

Supplement: Supplementary file 6 [file Raab_Bridging_Adversarial_and_ACCV_2020_supplemental.zip]

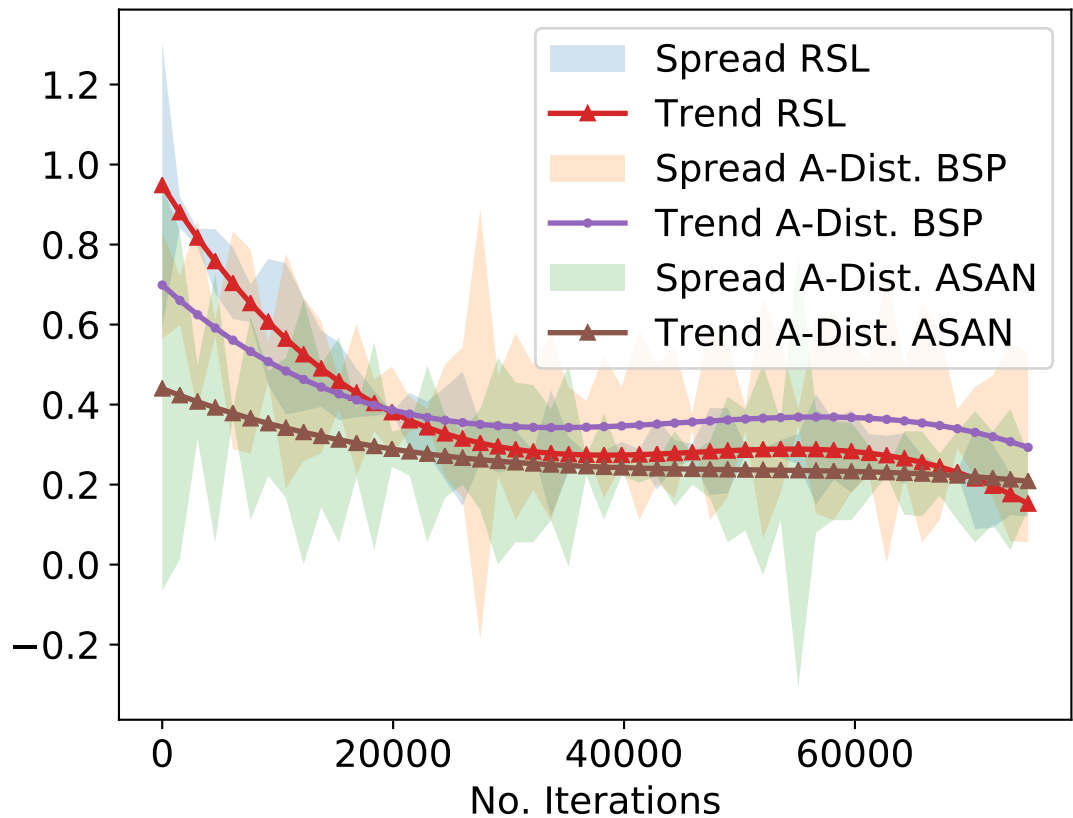

Supplement: Supplementary file 7 [file Raab_Bridging_Adversarial_and_ACCV_2020_supplemental.zip]

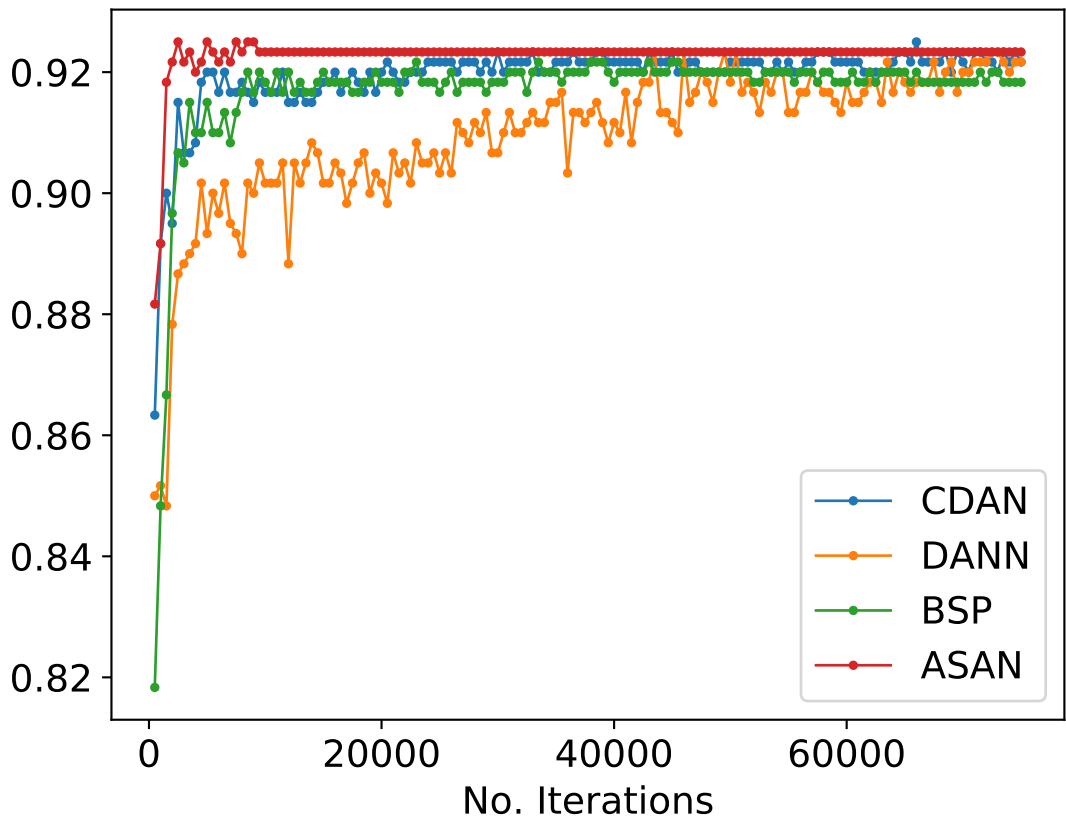

Supplement: Supplementary file 8 [file Raab_Bridging_Adversarial_and_ACCV_2020_supplemental.zip]

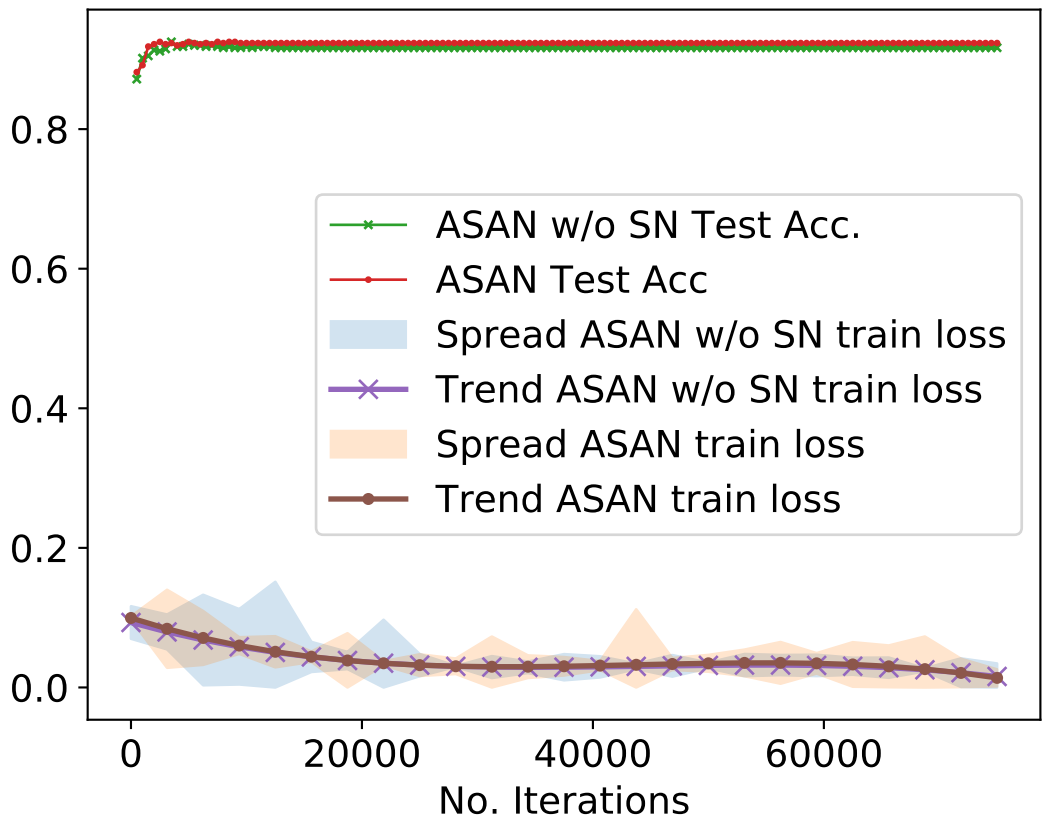

Supplement: Supplementary file 9 [file Raab_Bridging_Adversarial_and_ACCV_2020_supplemental.zip]

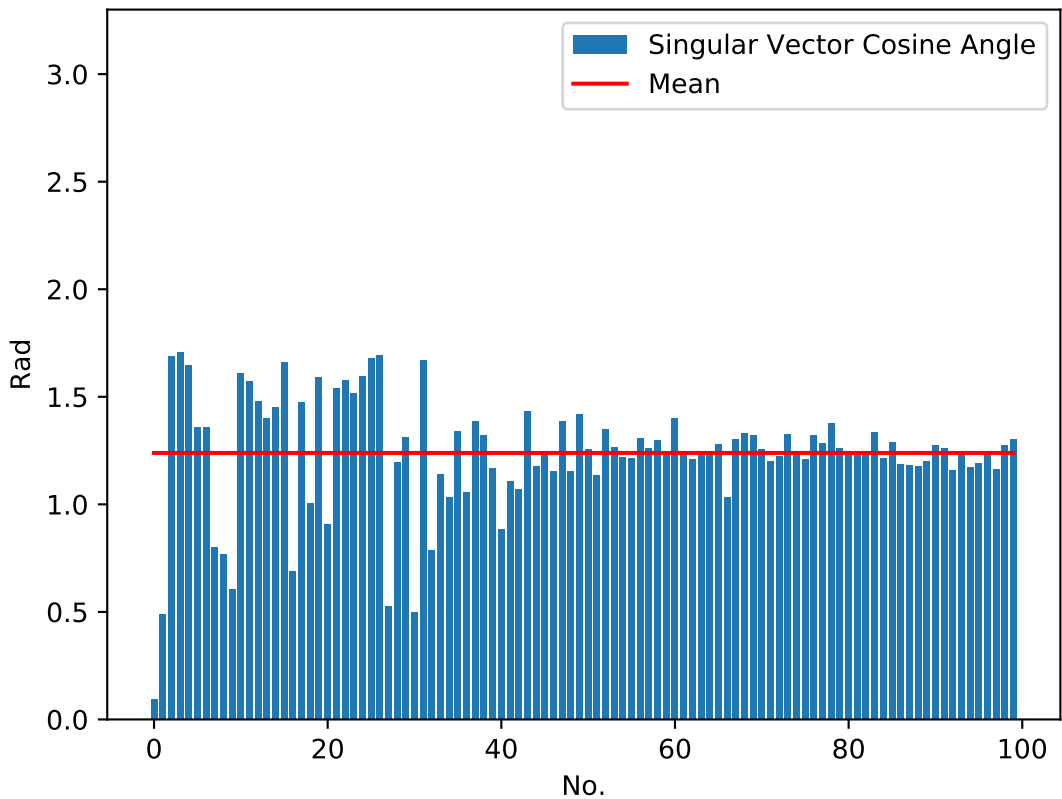

Supplement: Supplementary file 10 [file Raab_Bridging_Adversarial_and_ACCV_2020_supplemental.zip › CDAN_plot_angle.pdf]

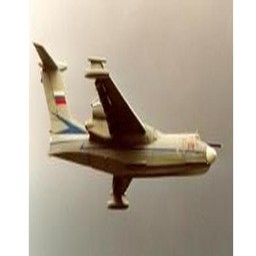

Supplement: Supplementary file 10 [file Raab_Bridging_Adversarial_and_ACCV_2020_supplemental.zip › dataset/imageClef/c/0/251_0023.jpg]

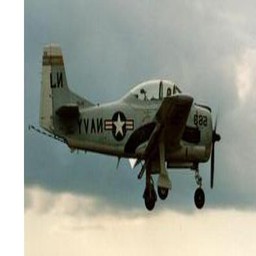

Supplement: Supplementary file 10 [file Raab_Bridging_Adversarial_and_ACCV_2020_supplemental.zip › dataset/imageClef/c/0/251_0090.jpg]

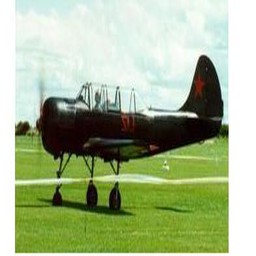

Supplement: Supplementary file 10 [file Raab_Bridging_Adversarial_and_ACCV_2020_supplemental.zip › dataset/imageClef/c/0/251_0115.jpg]

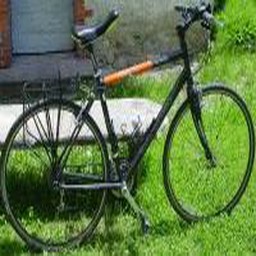

Supplement: Supplementary file 10 [file Raab_Bridging_Adversarial_and_ACCV_2020_supplemental.zip › dataset/imageClef/c/1/224_0007.jpg]

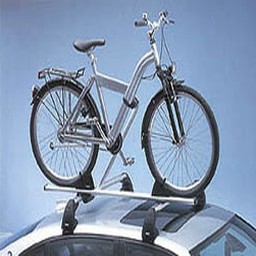

Supplement: Supplementary file 10 [file Raab_Bridging_Adversarial_and_ACCV_2020_supplemental.zip › dataset/imageClef/c/1/224_0044.jpg]

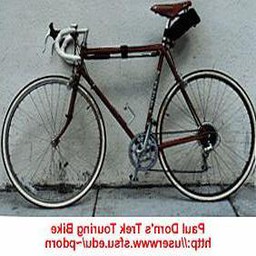

Supplement: Supplementary file 10 [file Raab_Bridging_Adversarial_and_ACCV_2020_supplemental.zip › dataset/imageClef/c/1/224_0067.jpg]

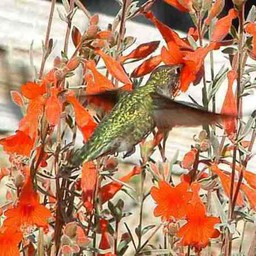

Supplement: Supplementary file 10 [file Raab_Bridging_Adversarial_and_ACCV_2020_supplemental.zip › dataset/imageClef/c/2/113_0022.jpg]

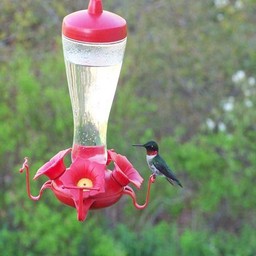

Supplement: Supplementary file 10 [file Raab_Bridging_Adversarial_and_ACCV_2020_supplemental.zip › dataset/imageClef/c/2/113_0115.jpg]

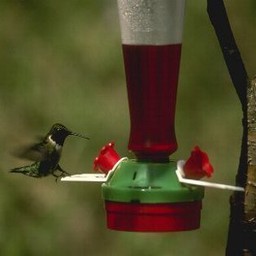

Supplement: Supplementary file 10 [file Raab_Bridging_Adversarial_and_ACCV_2020_supplemental.zip › dataset/imageClef/c/2/113_0116.jpg]

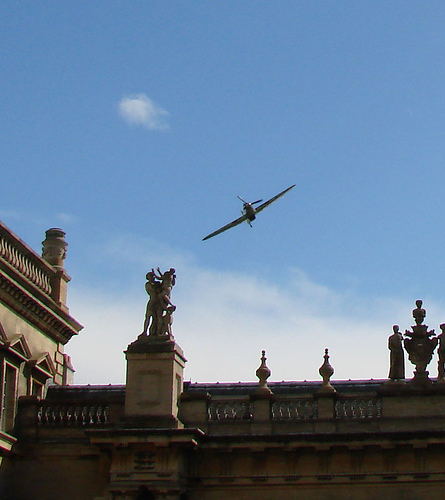

Supplement: Supplementary file 10 [file Raab_Bridging_Adversarial_and_ACCV_2020_supplemental.zip › dataset/imageClef/i/0/n02691156_11729.JPEG]

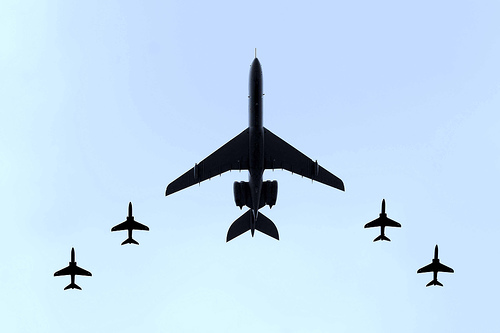

Supplement: Supplementary file 10 [file Raab_Bridging_Adversarial_and_ACCV_2020_supplemental.zip › dataset/imageClef/i/0/n02691156_1806.JPEG]

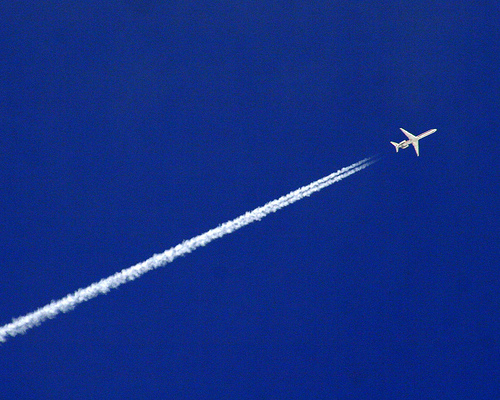

Supplement: Supplementary file 10 [file Raab_Bridging_Adversarial_and_ACCV_2020_supplemental.zip › dataset/imageClef/i/0/n02691156_49198.JPEG]

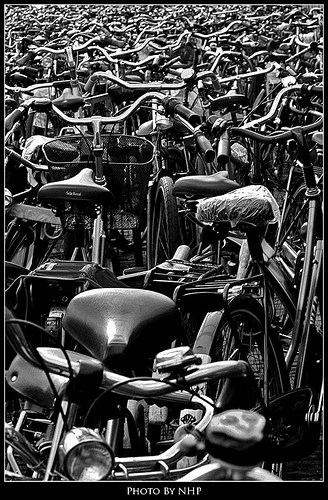

Supplement: Supplementary file 10 [file Raab_Bridging_Adversarial_and_ACCV_2020_supplemental.zip › dataset/imageClef/i/1/n02834778_2737.JPEG]

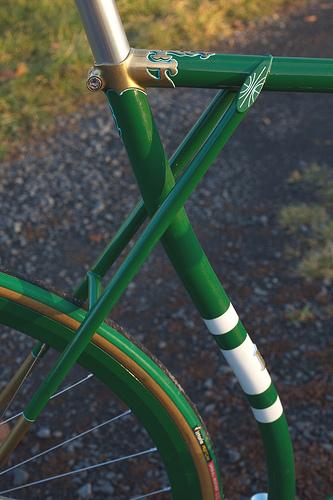

Supplement: Supplementary file 10 [file Raab_Bridging_Adversarial_and_ACCV_2020_supplemental.zip › dataset/imageClef/i/1/n02834778_763.JPEG]

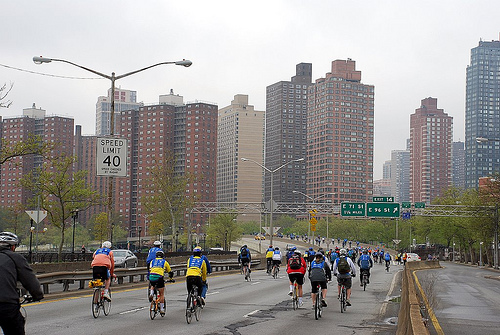

Supplement: Supplementary file 10 [file Raab_Bridging_Adversarial_and_ACCV_2020_supplemental.zip › dataset/imageClef/i/1/n02834778_8949.JPEG]

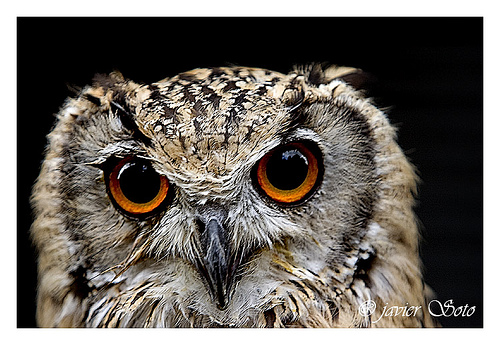

Supplement: Supplementary file 10 [file Raab_Bridging_Adversarial_and_ACCV_2020_supplemental.zip › dataset/imageClef/i/2/n01503061_12696.JPEG]

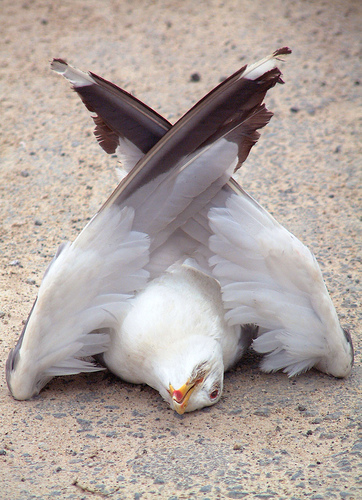

Supplement: Supplementary file 10 [file Raab_Bridging_Adversarial_and_ACCV_2020_supplemental.zip › dataset/imageClef/i/2/n01503061_14761.JPEG]

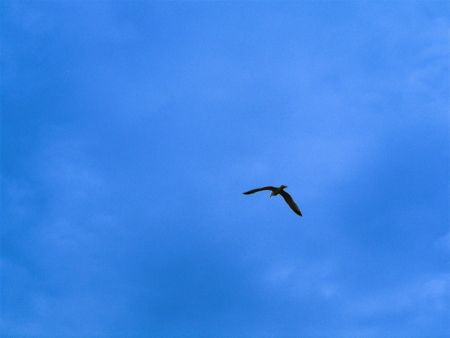

Supplement: Supplementary file 10 [file Raab_Bridging_Adversarial_and_ACCV_2020_supplemental.zip › dataset/imageClef/i/2/n01503061_3094.JPEG]

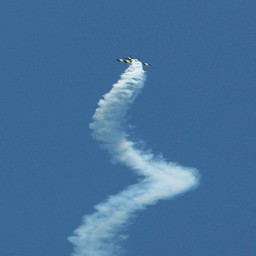

Supplement: Supplementary file 10 [file Raab_Bridging_Adversarial_and_ACCV_2020_supplemental.zip › dataset/imageClef/p/0/2008_005905.jpg]

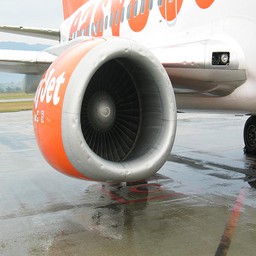

Supplement: Supplementary file 10 [file Raab_Bridging_Adversarial_and_ACCV_2020_supplemental.zip › dataset/imageClef/p/0/2011_002751.jpg]

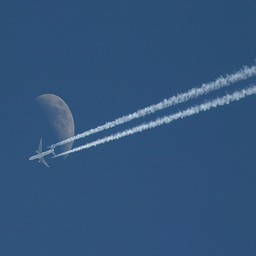

Supplement: Supplementary file 10 [file Raab_Bridging_Adversarial_and_ACCV_2020_supplemental.zip › dataset/imageClef/p/0/2011_002993.jpg]

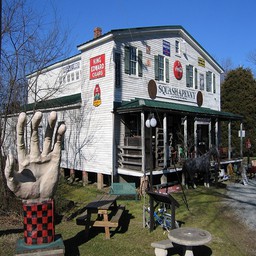

Supplement: Supplementary file 10 [file Raab_Bridging_Adversarial_and_ACCV_2020_supplemental.zip › dataset/imageClef/p/1/2008_005175.jpg]

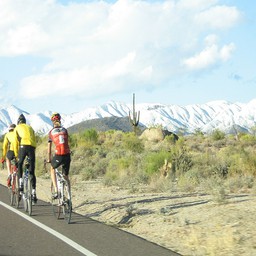

Supplement: Supplementary file 10 [file Raab_Bridging_Adversarial_and_ACCV_2020_supplemental.zip › dataset/imageClef/p/1/2008_007510.jpg]

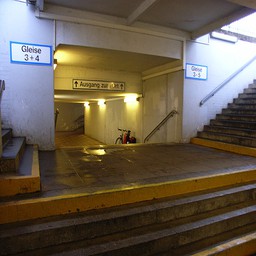

Supplement: Supplementary file 10 [file Raab_Bridging_Adversarial_and_ACCV_2020_supplemental.zip › dataset/imageClef/p/1/2011_000087.jpg]

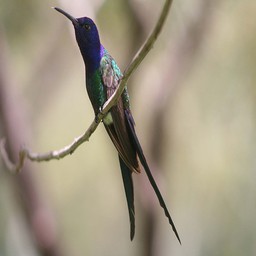

Supplement: Supplementary file 10 [file Raab_Bridging_Adversarial_and_ACCV_2020_supplemental.zip › dataset/imageClef/p/2/2008_007003.jpg]

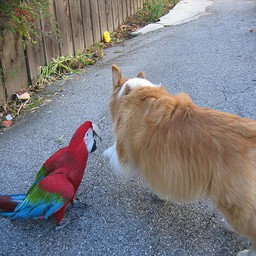

Supplement: Supplementary file 10 [file Raab_Bridging_Adversarial_and_ACCV_2020_supplemental.zip › dataset/imageClef/p/2/2008_007486.jpg]

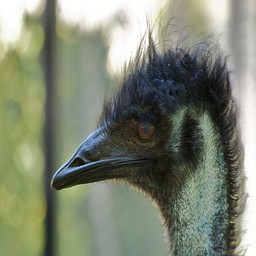

Supplement: Supplementary file 10 [file Raab_Bridging_Adversarial_and_ACCV_2020_supplemental.zip › dataset/imageClef/p/2/2009_003285.jpg]

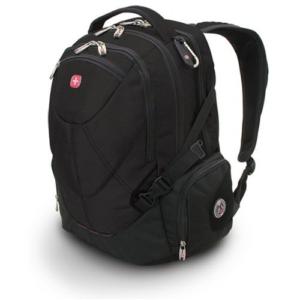

Supplement: Supplementary file 10 [file Raab_Bridging_Adversarial_and_ACCV_2020_supplemental.zip › dataset/Office-31/amazon/back_back/frame_0001.jpg]

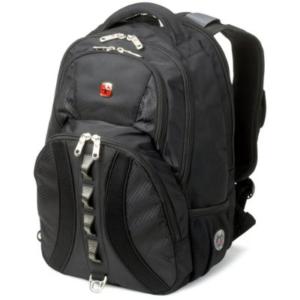

Supplement: Supplementary file 10 [file Raab_Bridging_Adversarial_and_ACCV_2020_supplemental.zip › dataset/Office-31/amazon/back_back/frame_0002.jpg]

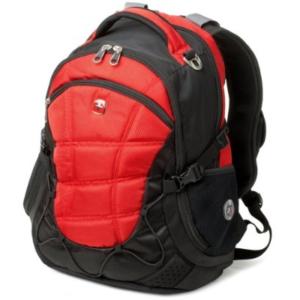

Supplement: Supplementary file 10 [file Raab_Bridging_Adversarial_and_ACCV_2020_supplemental.zip › dataset/Office-31/amazon/back_back/frame_0003.jpg]

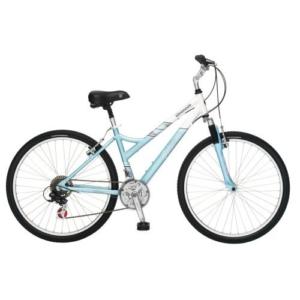

Supplement: Supplementary file 10 [file Raab_Bridging_Adversarial_and_ACCV_2020_supplemental.zip › dataset/Office-31/amazon/bike/frame_0001.jpg]

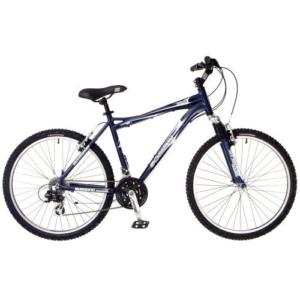

Supplement: Supplementary file 10 [file Raab_Bridging_Adversarial_and_ACCV_2020_supplemental.zip › dataset/Office-31/amazon/bike/frame_0002.jpg]

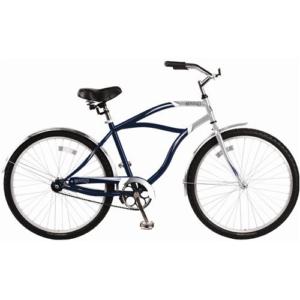

Supplement: Supplementary file 10 [file Raab_Bridging_Adversarial_and_ACCV_2020_supplemental.zip › dataset/Office-31/amazon/bike/frame_0003.jpg]

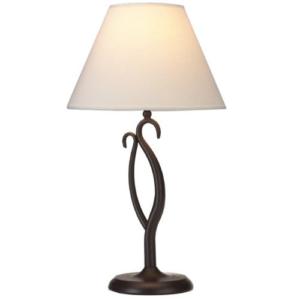

Supplement: Supplementary file 10 [file Raab_Bridging_Adversarial_and_ACCV_2020_supplemental.zip › dataset/Office-31/amazon/desk_lamp/frame_0001.jpg]

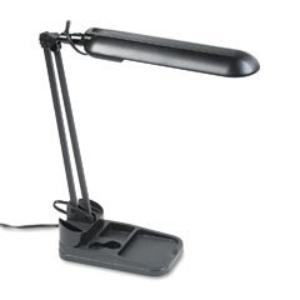

Supplement: Supplementary file 10 [file Raab_Bridging_Adversarial_and_ACCV_2020_supplemental.zip › dataset/Office-31/amazon/desk_lamp/frame_0002.jpg]

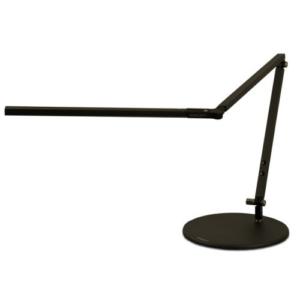

Supplement: Supplementary file 10 [file Raab_Bridging_Adversarial_and_ACCV_2020_supplemental.zip › dataset/Office-31/amazon/desk_lamp/frame_0003.jpg]

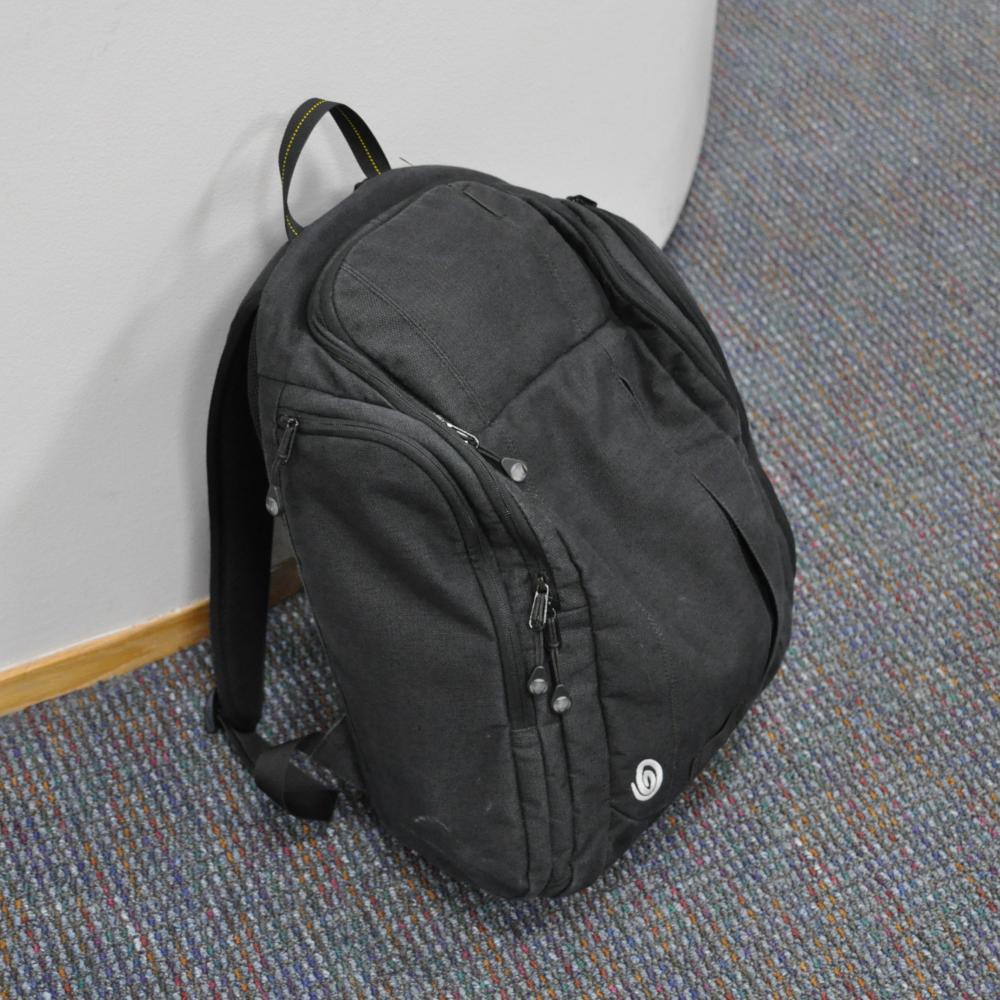

Supplement: Supplementary file 10 [file Raab_Bridging_Adversarial_and_ACCV_2020_supplemental.zip › dataset/Office-31/dslr/back_pack/frame_0001.jpg]

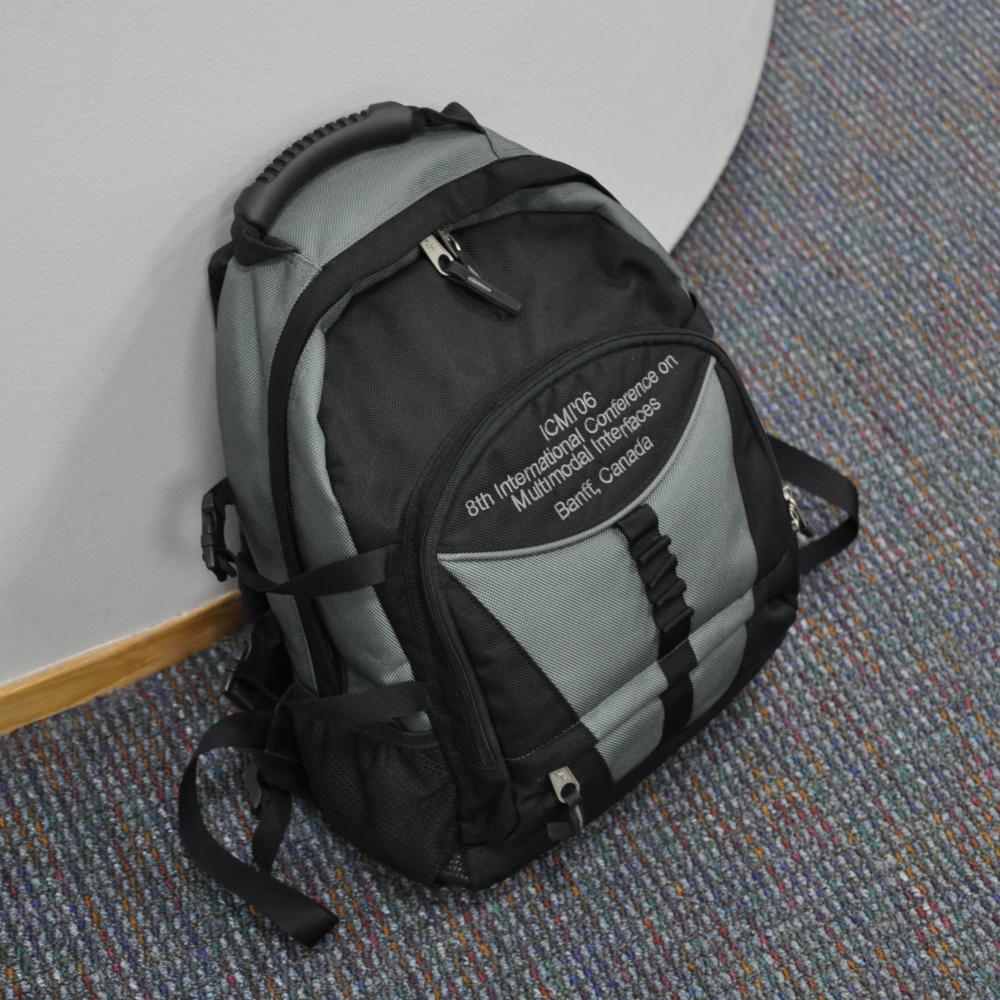

Supplement: Supplementary file 10 [file Raab_Bridging_Adversarial_and_ACCV_2020_supplemental.zip › dataset/Office-31/dslr/back_pack/frame_0008.jpg]

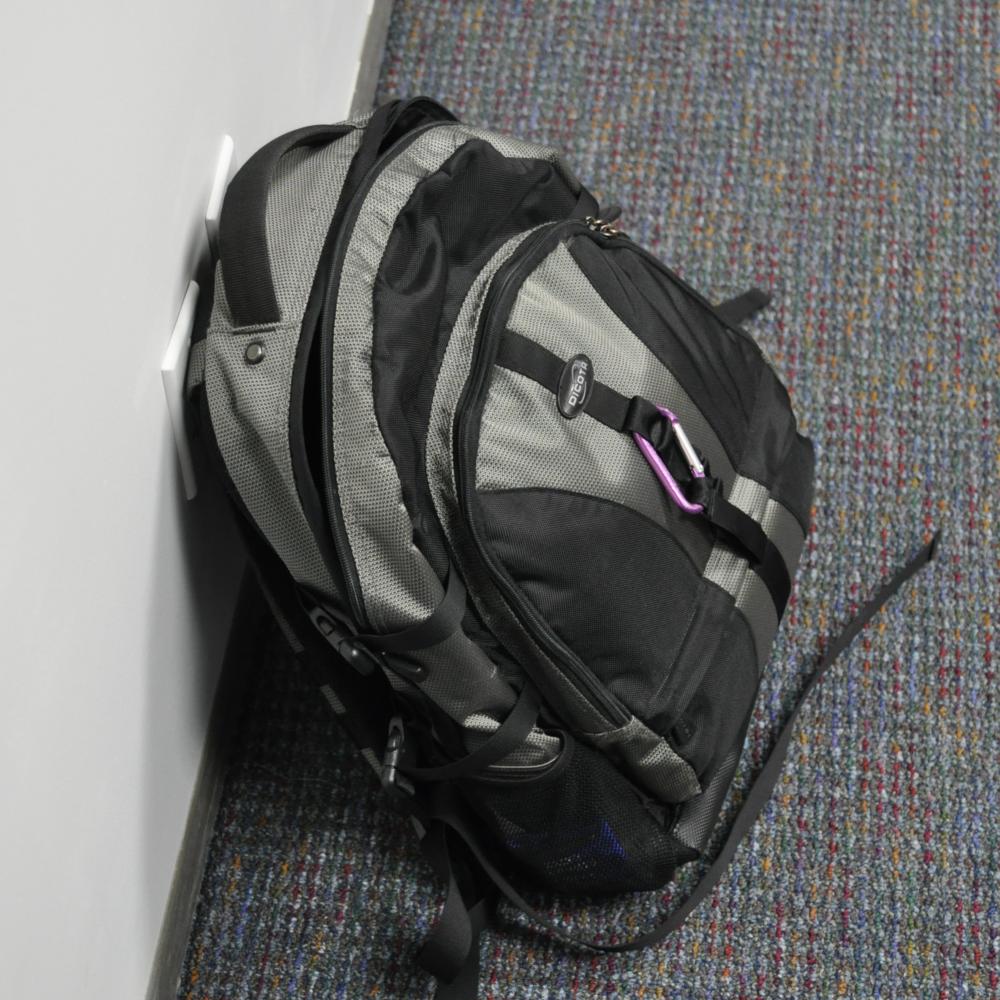

Supplement: Supplementary file 10 [file Raab_Bridging_Adversarial_and_ACCV_2020_supplemental.zip › dataset/Office-31/dslr/back_pack/frame_0012.jpg]

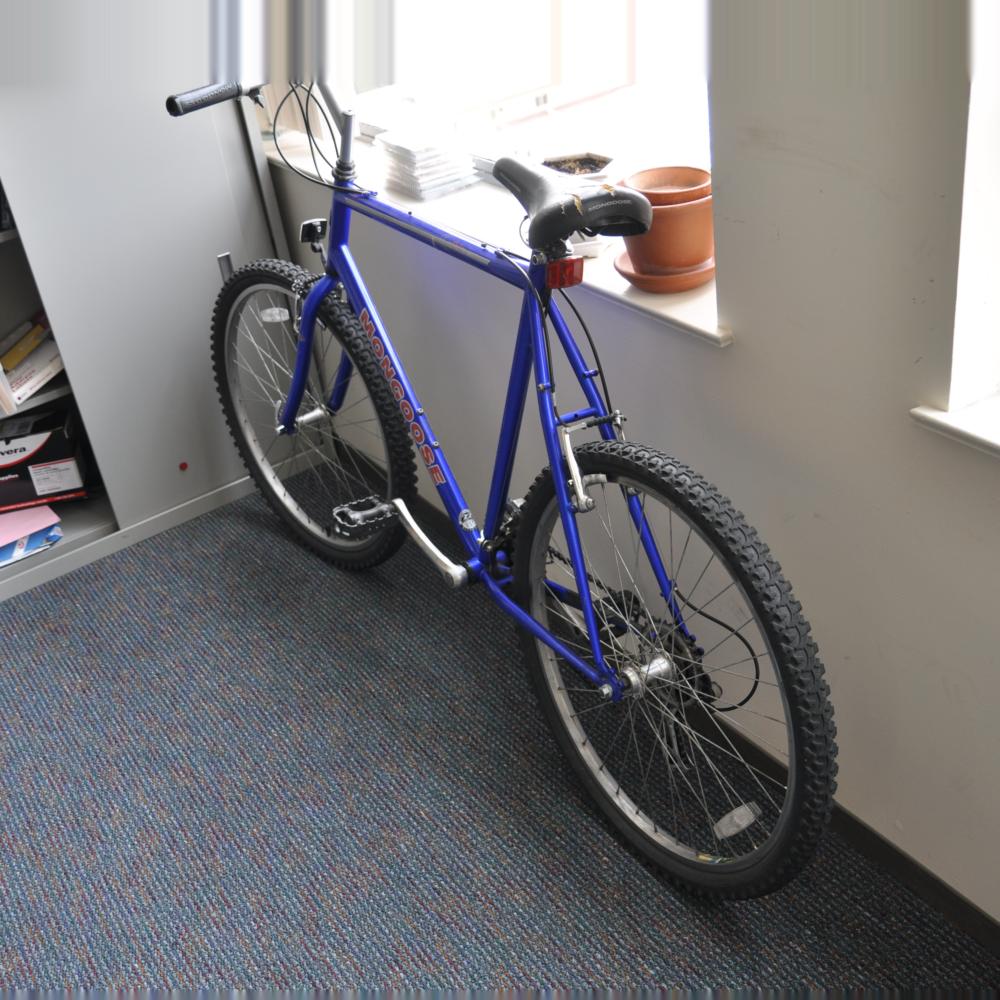

Supplement: Supplementary file 10 [file Raab_Bridging_Adversarial_and_ACCV_2020_supplemental.zip › dataset/Office-31/dslr/bike/frame_0001.jpg]

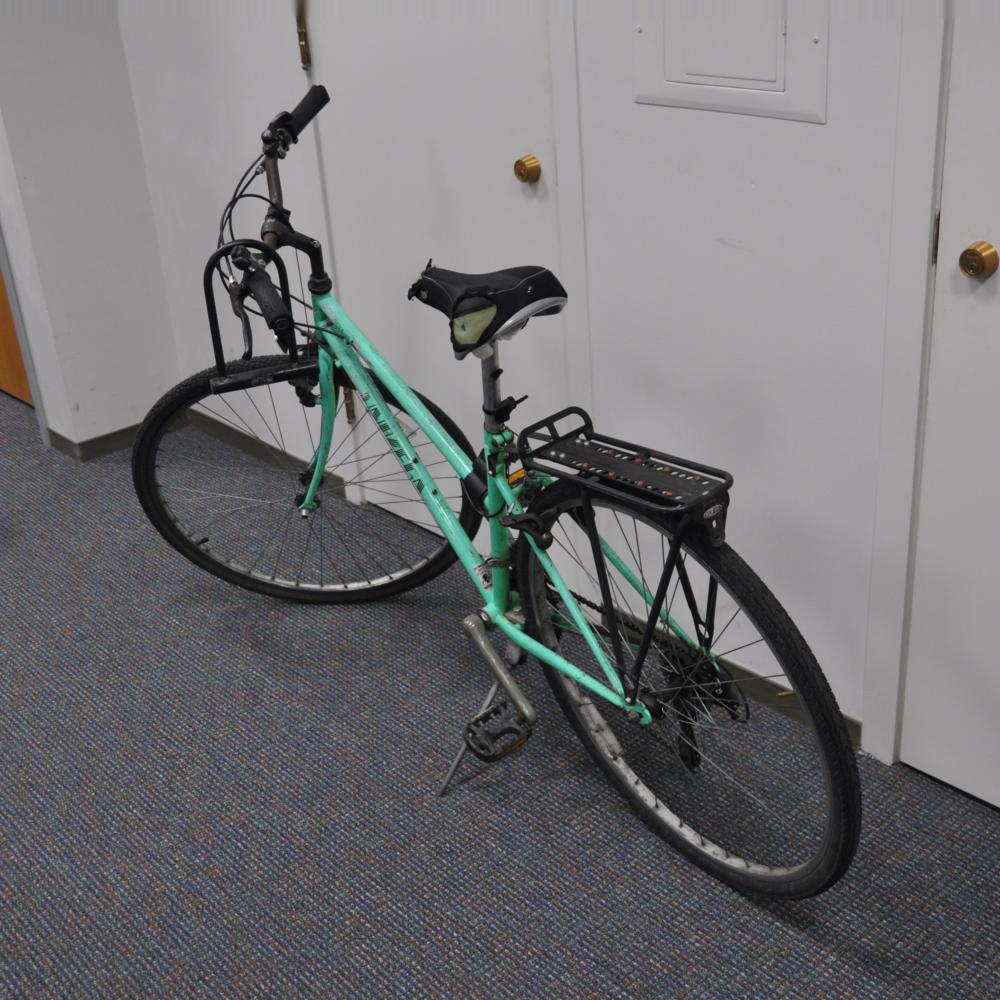

Supplement: Supplementary file 10 [file Raab_Bridging_Adversarial_and_ACCV_2020_supplemental.zip › dataset/Office-31/dslr/bike/frame_0008.jpg]

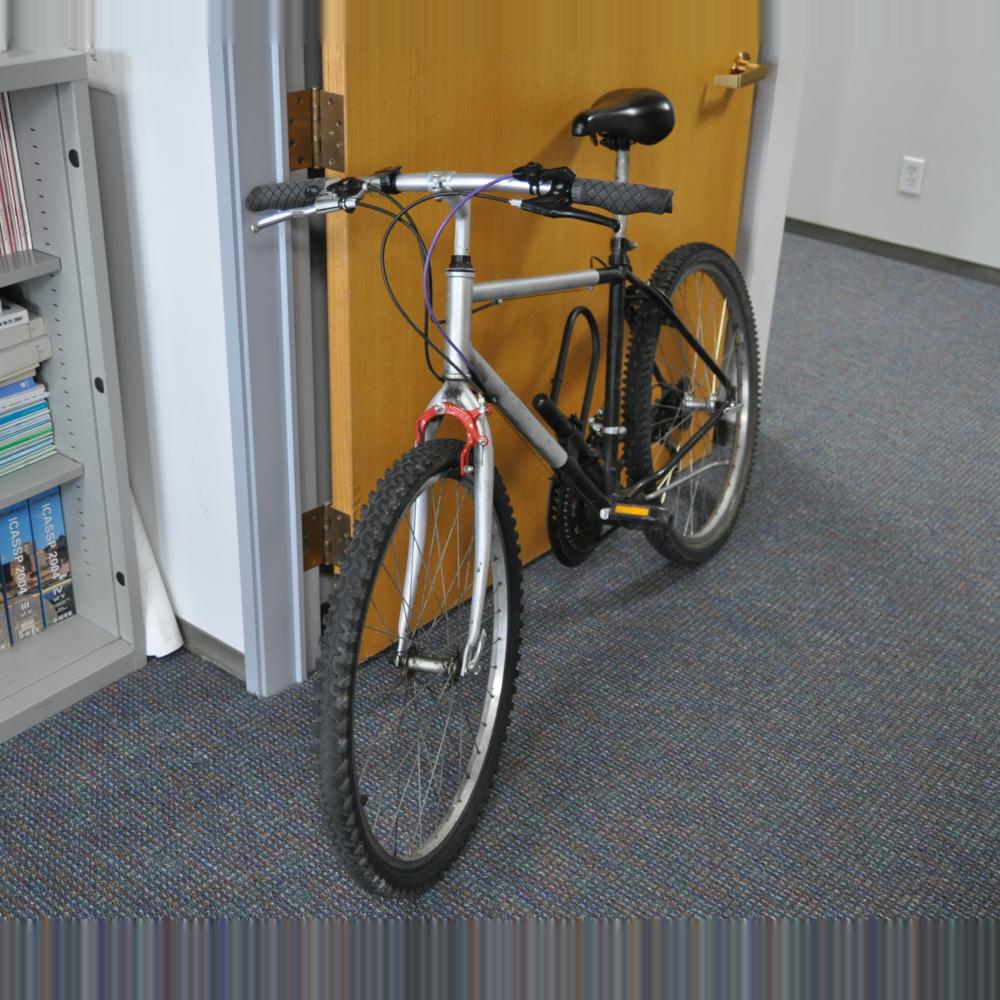

Supplement: Supplementary file 10 [file Raab_Bridging_Adversarial_and_ACCV_2020_supplemental.zip › dataset/Office-31/dslr/bike/frame_0009.jpg]

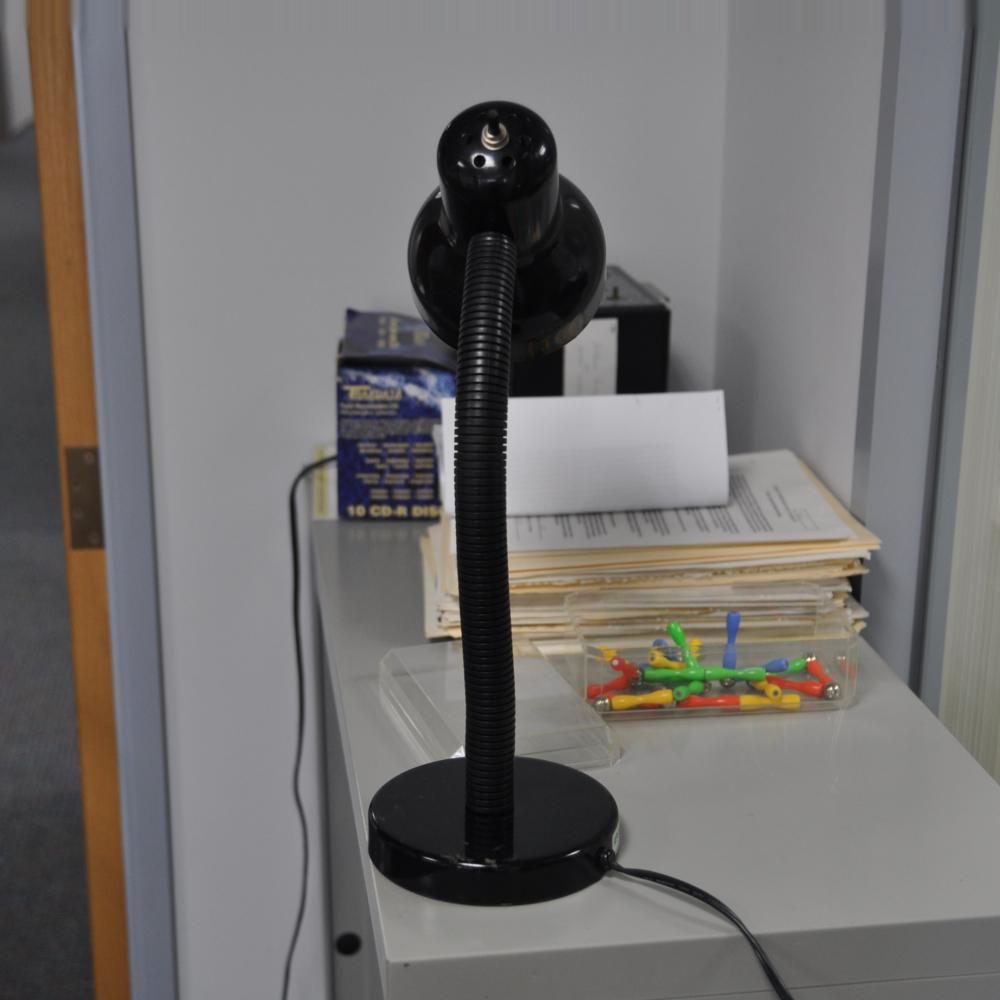

Supplement: Supplementary file 10 [file Raab_Bridging_Adversarial_and_ACCV_2020_supplemental.zip › dataset/Office-31/dslr/desk_lamp/frame_0004.jpg]

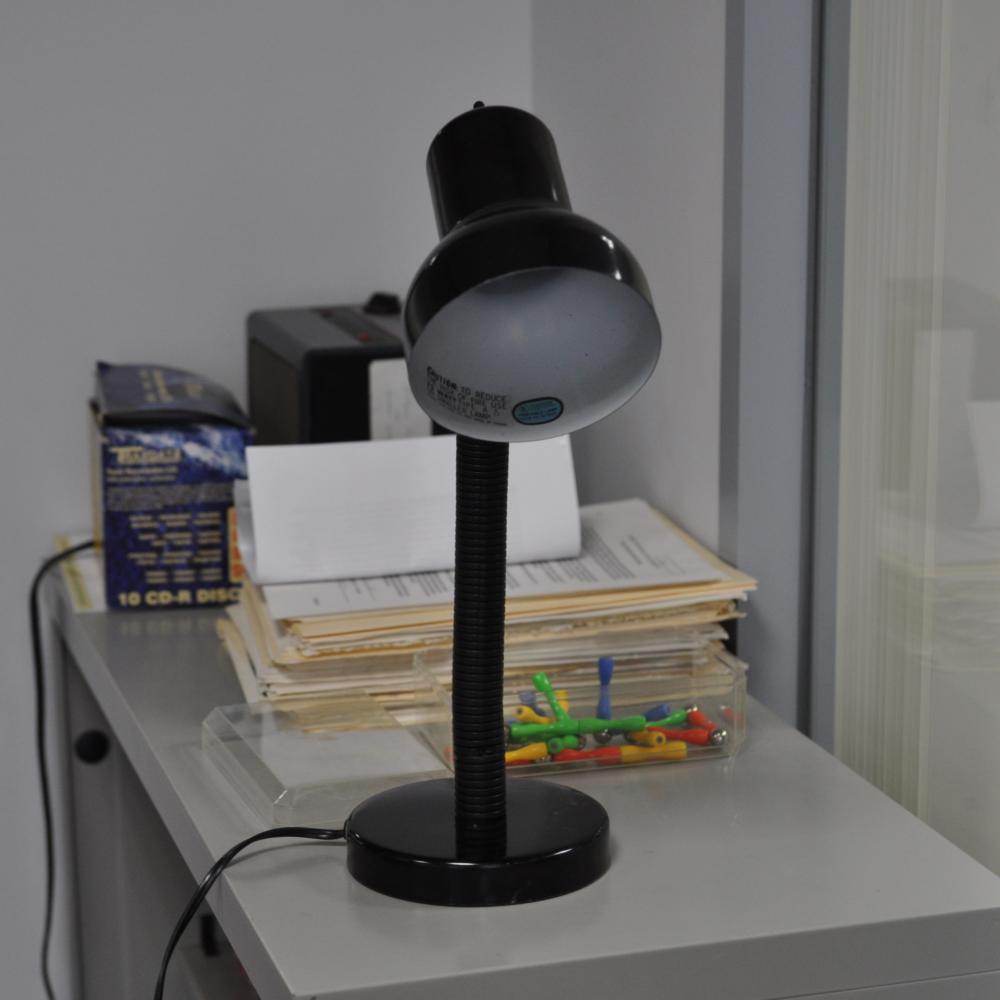

Supplement: Supplementary file 10 [file Raab_Bridging_Adversarial_and_ACCV_2020_supplemental.zip › dataset/Office-31/dslr/desk_lamp/frame_0006.jpg]

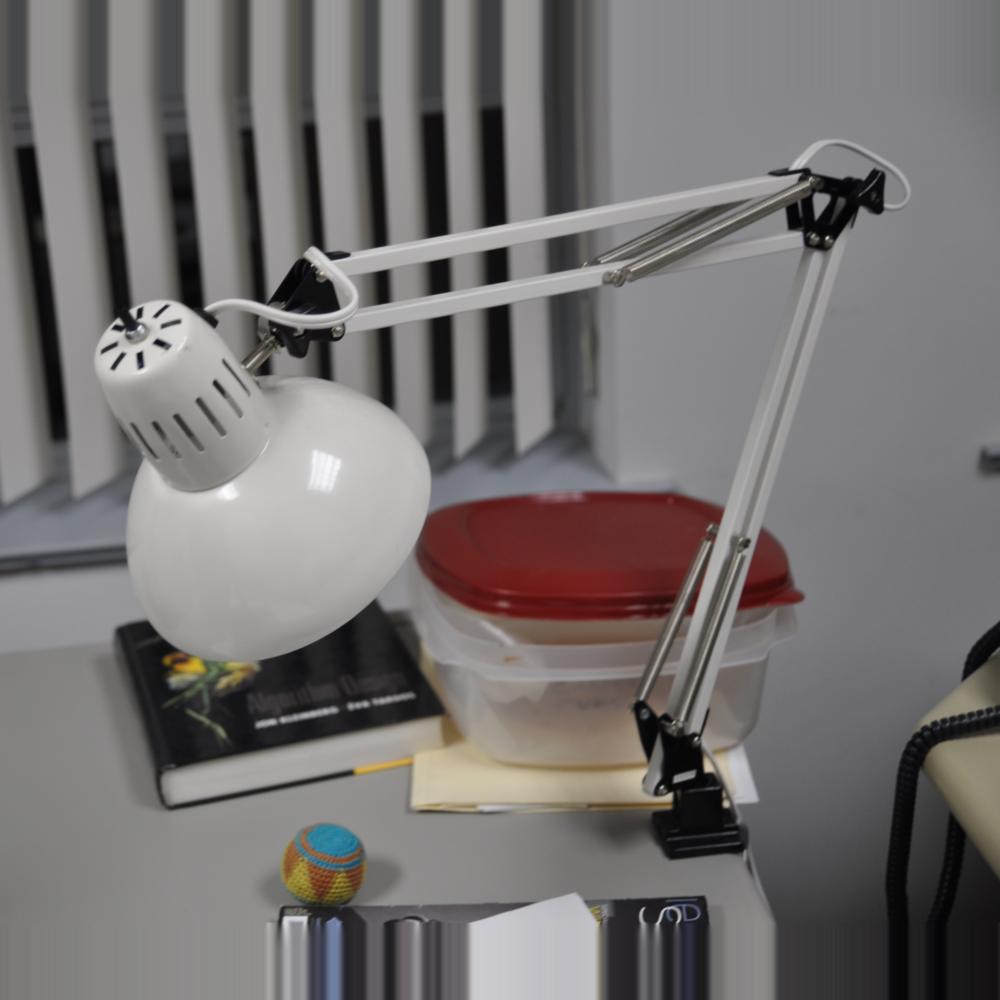

Supplement: Supplementary file 10 [file Raab_Bridging_Adversarial_and_ACCV_2020_supplemental.zip › dataset/Office-31/dslr/desk_lamp/frame_0010.jpg]

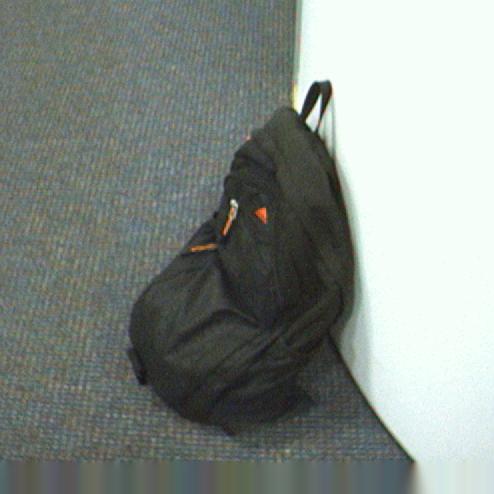

Supplement: Supplementary file 10 [file Raab_Bridging_Adversarial_and_ACCV_2020_supplemental.zip › dataset/Office-31/webcam/back_pack/frame_0007.jpg]

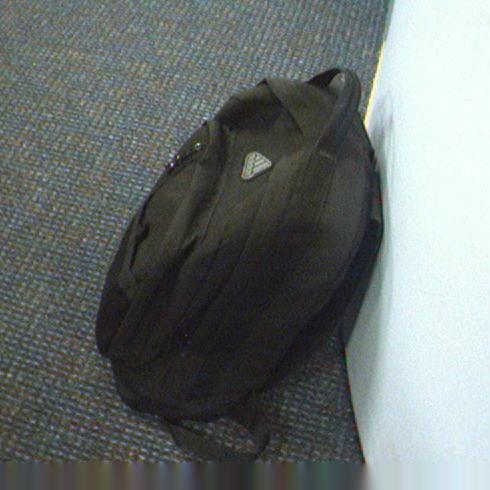

Supplement: Supplementary file 10 [file Raab_Bridging_Adversarial_and_ACCV_2020_supplemental.zip › dataset/Office-31/webcam/back_pack/frame_0018.jpg]

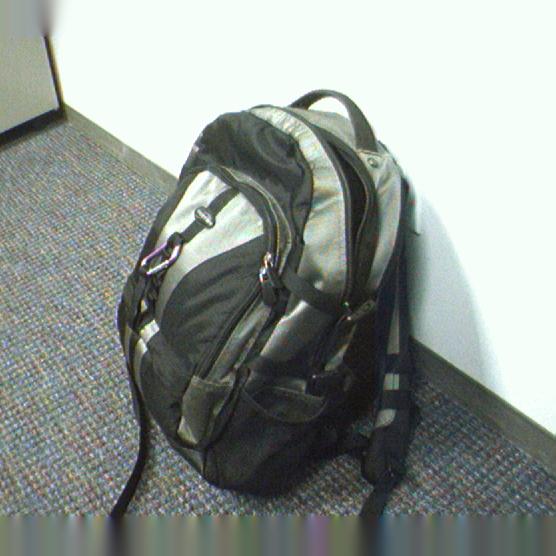

Supplement: Supplementary file 10 [file Raab_Bridging_Adversarial_and_ACCV_2020_supplemental.zip › dataset/Office-31/webcam/back_pack/frame_0026.jpg]

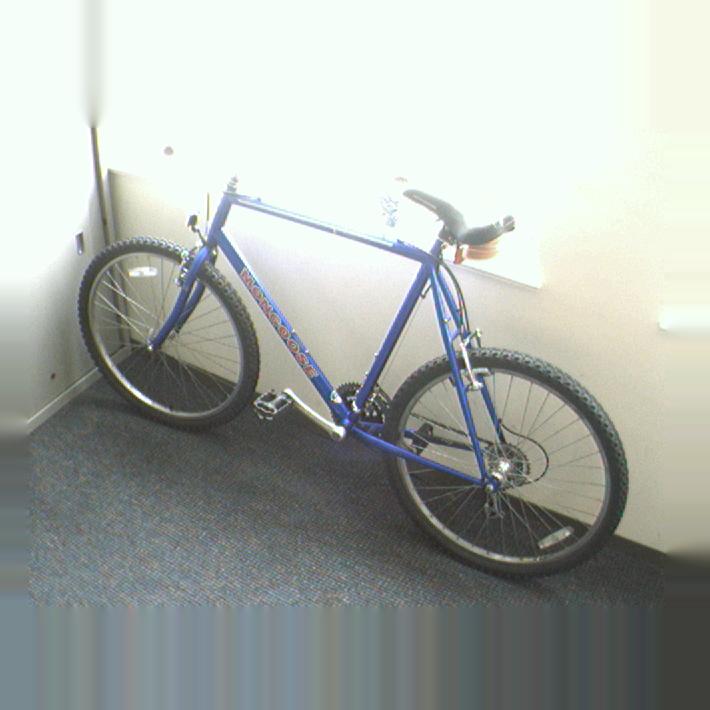

Supplement: Supplementary file 10 [file Raab_Bridging_Adversarial_and_ACCV_2020_supplemental.zip › dataset/Office-31/webcam/bike/frame_0002.jpg]

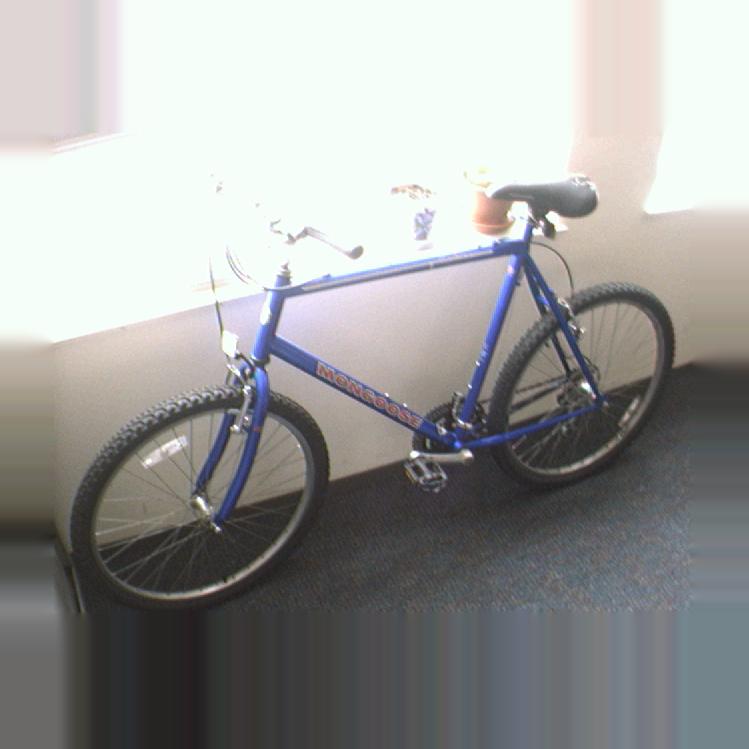

Supplement: Supplementary file 10 [file Raab_Bridging_Adversarial_and_ACCV_2020_supplemental.zip › dataset/Office-31/webcam/bike/frame_0003.jpg]

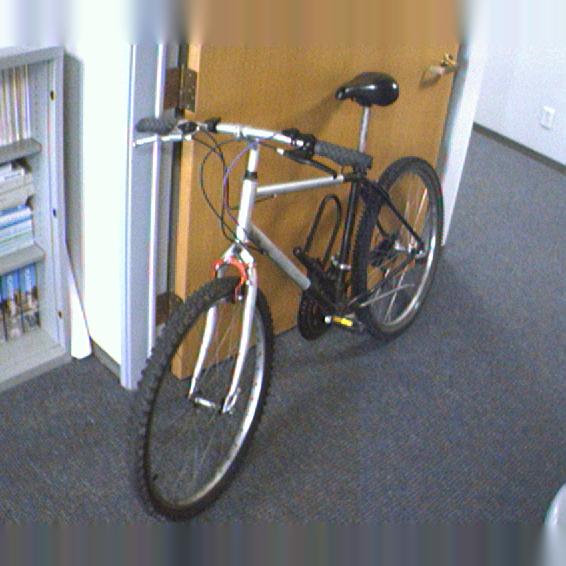

Supplement: Supplementary file 10 [file Raab_Bridging_Adversarial_and_ACCV_2020_supplemental.zip › dataset/Office-31/webcam/bike/frame_0010.jpg]

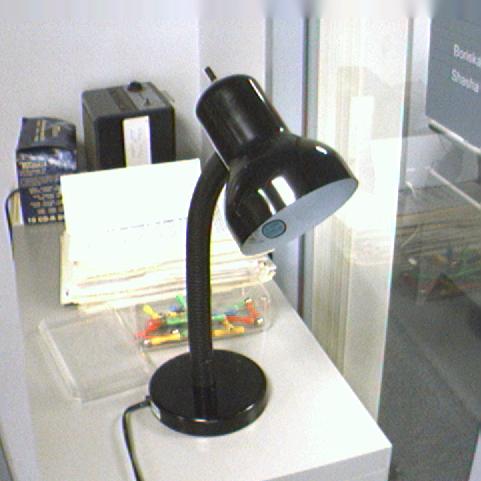

Supplement: Supplementary file 10 [file Raab_Bridging_Adversarial_and_ACCV_2020_supplemental.zip › dataset/Office-31/webcam/desk_lamp/frame_0006.jpg]

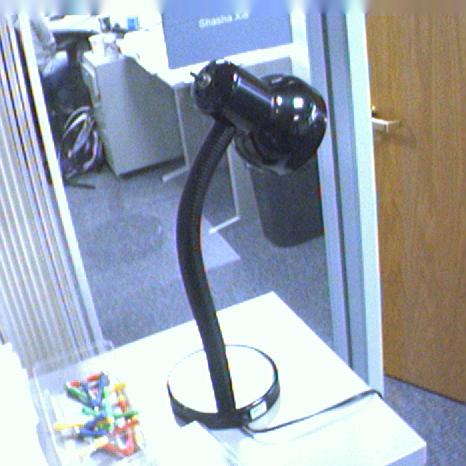

Supplement: Supplementary file 10 [file Raab_Bridging_Adversarial_and_ACCV_2020_supplemental.zip › dataset/Office-31/webcam/desk_lamp/frame_0008.jpg]

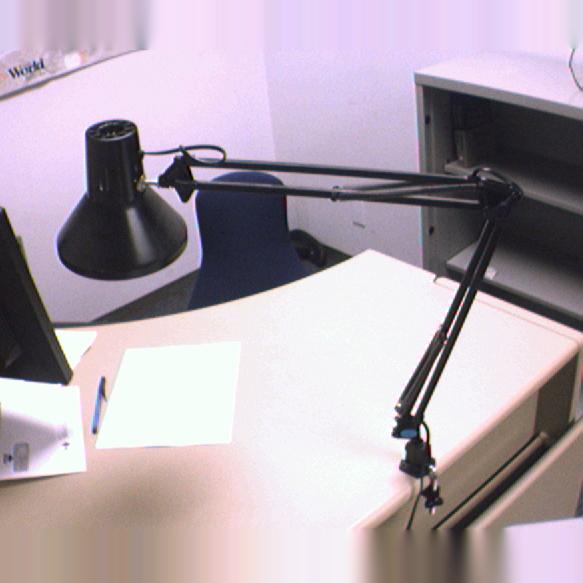

Supplement: Supplementary file 10 [file Raab_Bridging_Adversarial_and_ACCV_2020_supplemental.zip › dataset/Office-31/webcam/desk_lamp/frame_0012.jpg]

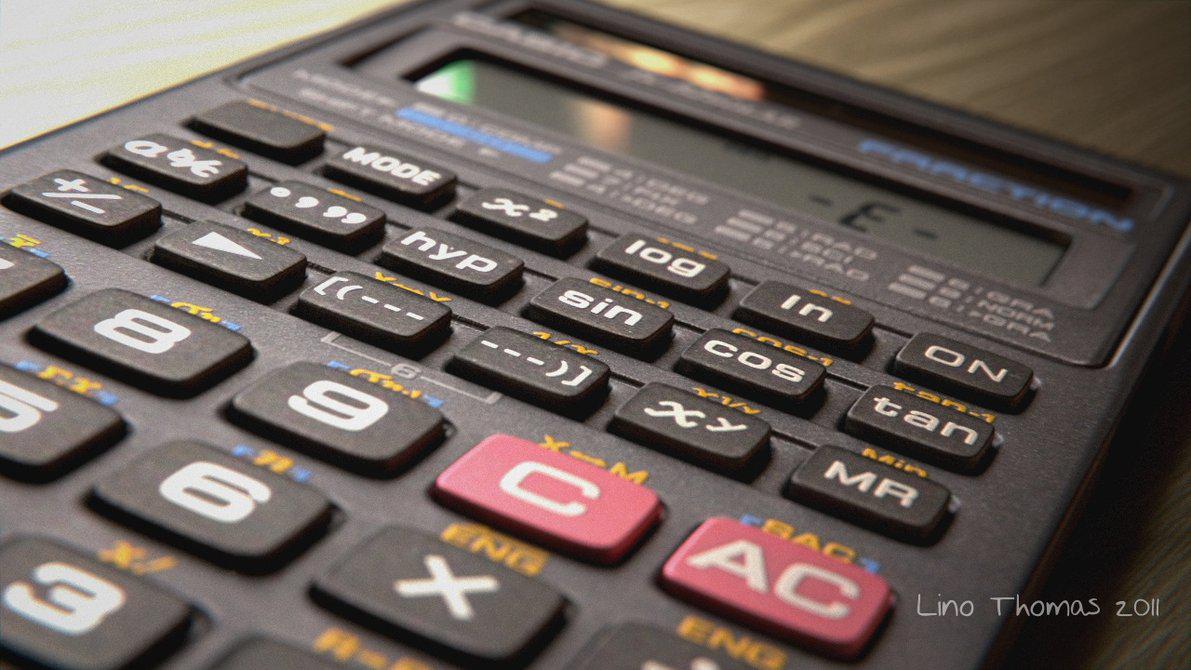

Supplement: Supplementary file 10 [file Raab_Bridging_Adversarial_and_ACCV_2020_supplemental.zip › dataset/Office-Home/Art/calculator/00001.jpg]

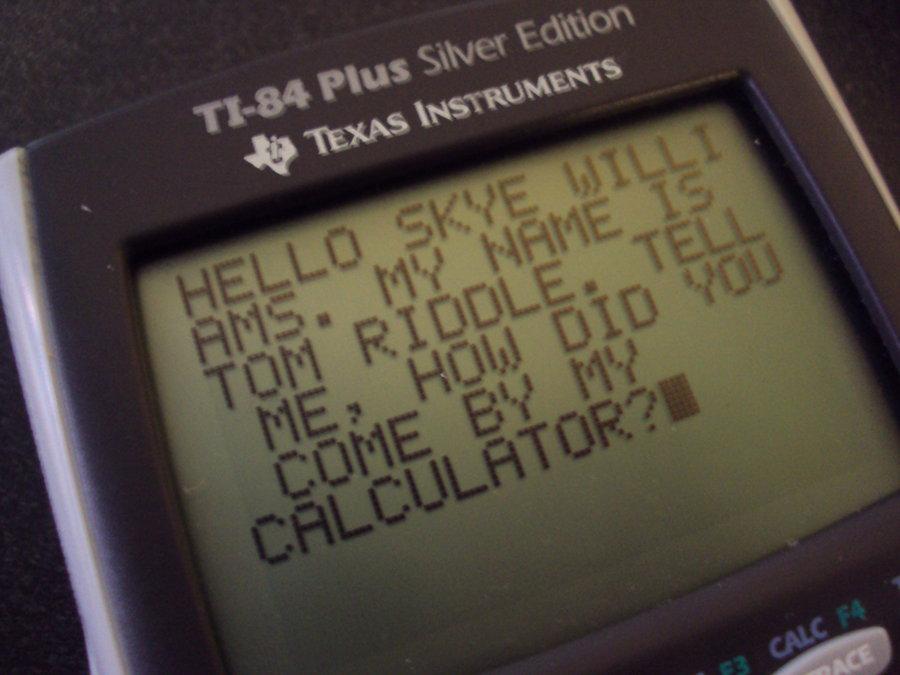

Supplement: Supplementary file 10 [file Raab_Bridging_Adversarial_and_ACCV_2020_supplemental.zip › dataset/Office-Home/Art/calculator/00004.jpg]

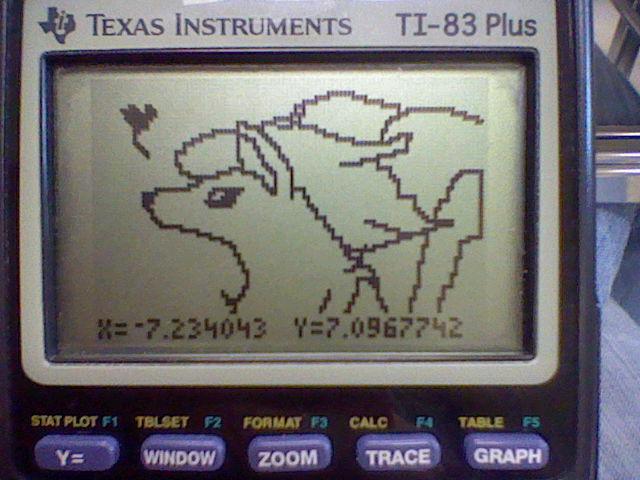

Supplement: Supplementary file 10 [file Raab_Bridging_Adversarial_and_ACCV_2020_supplemental.zip › dataset/Office-Home/Art/calculator/00006.jpg]

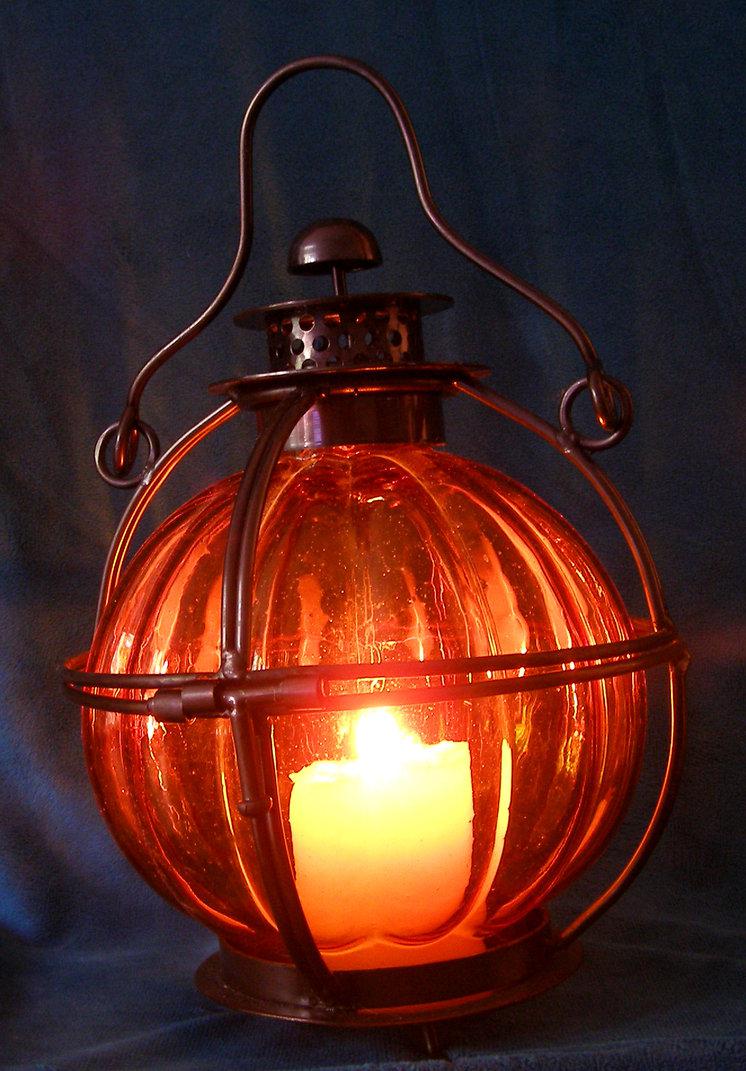

Supplement: Supplementary file 10 [file Raab_Bridging_Adversarial_and_ACCV_2020_supplemental.zip › dataset/Office-Home/Art/candles/00064.jpg]

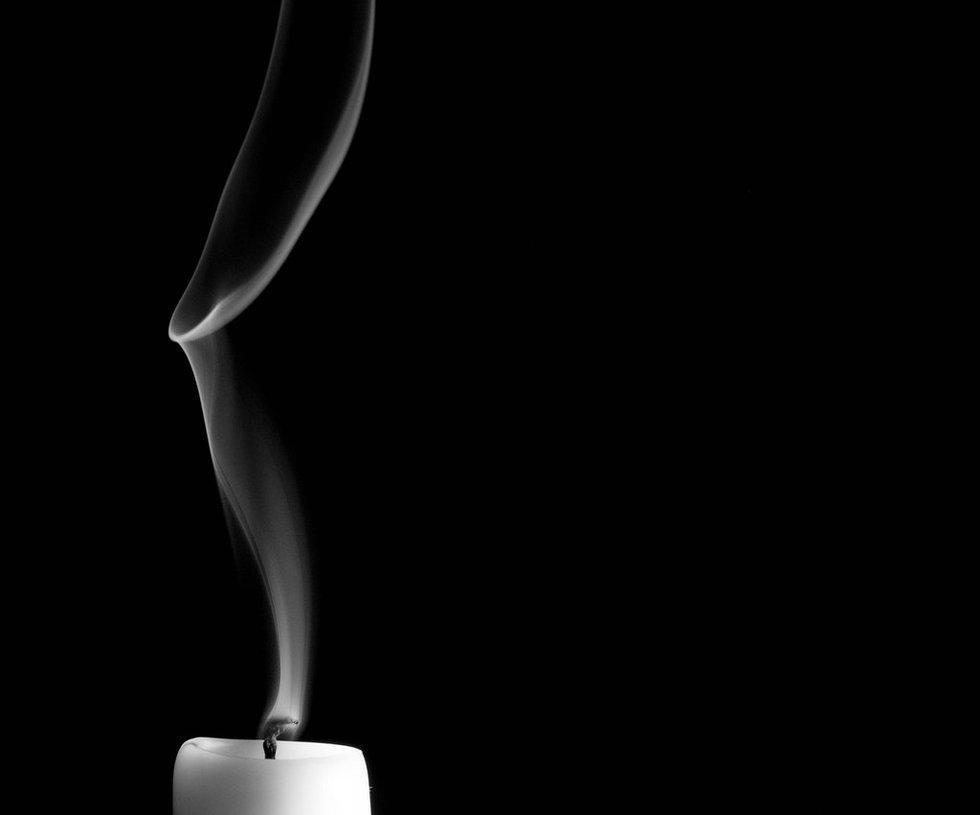

Supplement: Supplementary file 10 [file Raab_Bridging_Adversarial_and_ACCV_2020_supplemental.zip › dataset/Office-Home/Art/candles/00065.jpg]

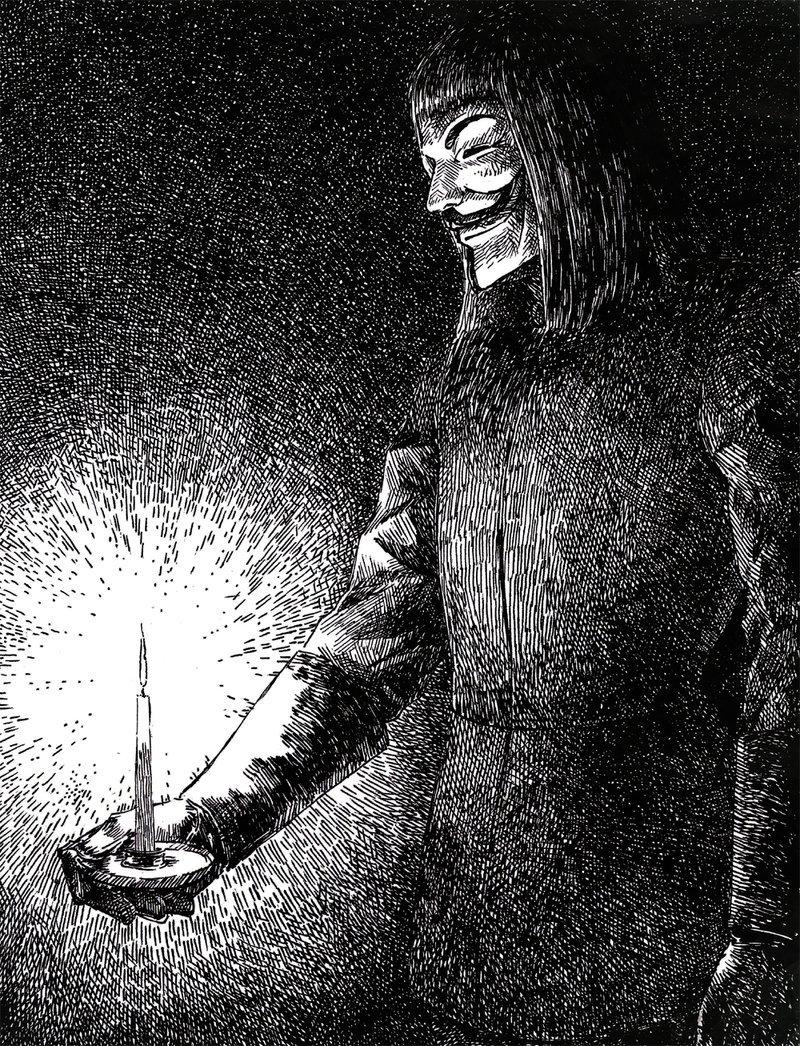

Supplement: Supplementary file 10 [file Raab_Bridging_Adversarial_and_ACCV_2020_supplemental.zip › dataset/Office-Home/Art/candles/00068.jpg]

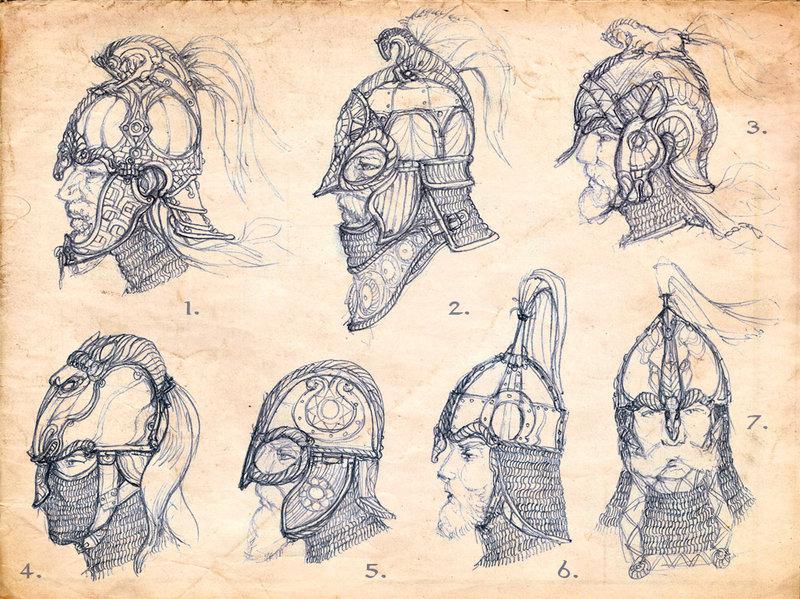

Supplement: Supplementary file 10 [file Raab_Bridging_Adversarial_and_ACCV_2020_supplemental.zip › dataset/Office-Home/Art/helmet/00053.jpg]

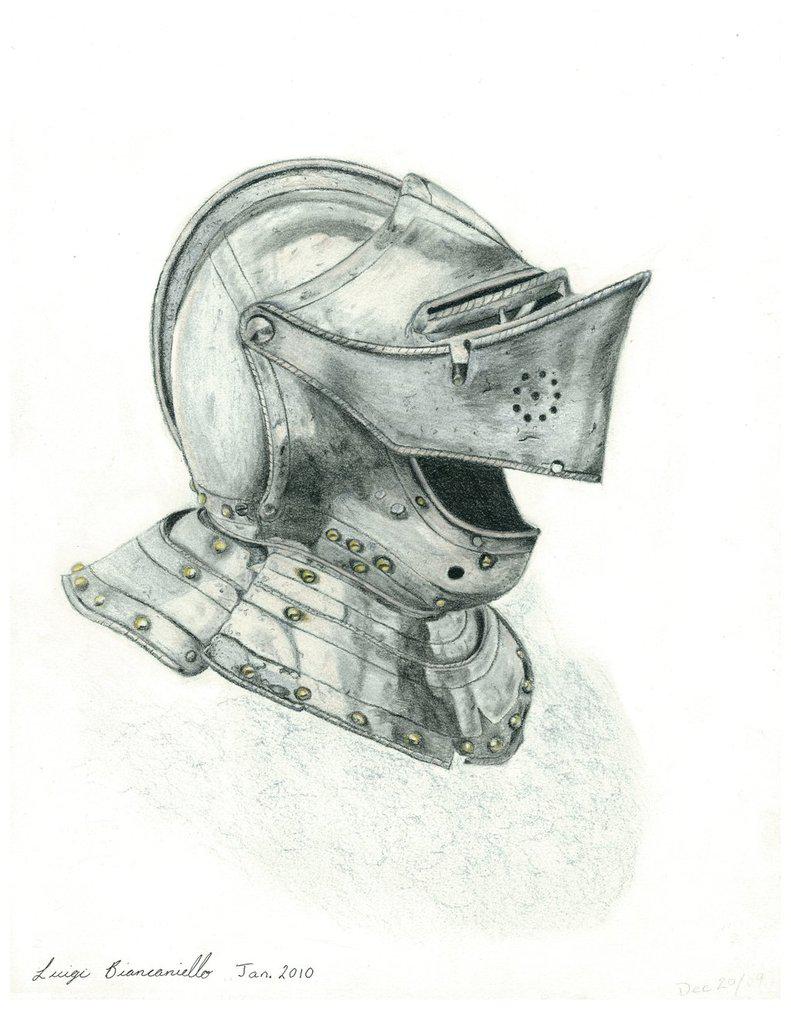

Supplement: Supplementary file 10 [file Raab_Bridging_Adversarial_and_ACCV_2020_supplemental.zip › dataset/Office-Home/Art/helmet/00073.jpg]

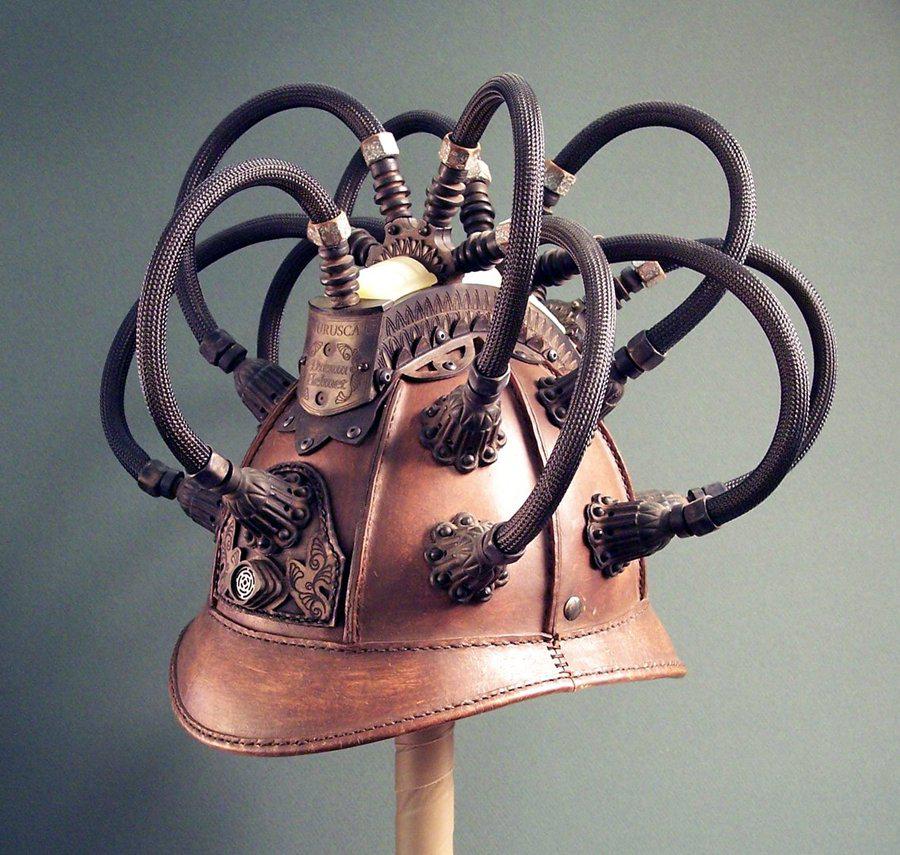

Supplement: Supplementary file 10 [file Raab_Bridging_Adversarial_and_ACCV_2020_supplemental.zip › dataset/Office-Home/Art/helmet/00079.jpg]

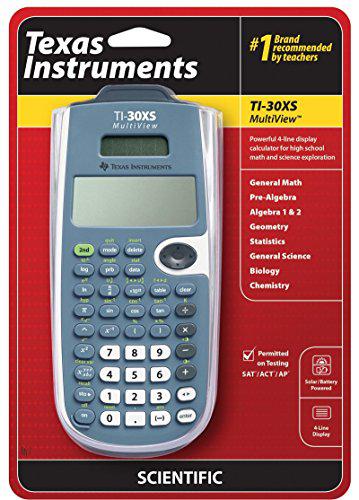

Supplement: Supplementary file 10 [file Raab_Bridging_Adversarial_and_ACCV_2020_supplemental.zip › dataset/Office-Home/Product/calculator/00013.jpg]

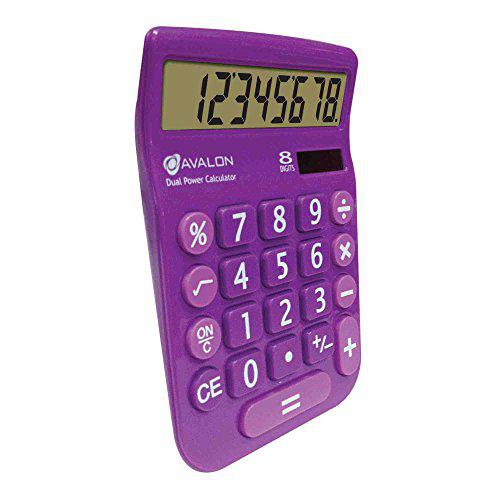

Supplement: Supplementary file 10 [file Raab_Bridging_Adversarial_and_ACCV_2020_supplemental.zip › dataset/Office-Home/Product/calculator/00022.jpg]

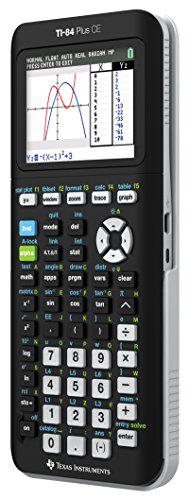

Supplement: Supplementary file 10 [file Raab_Bridging_Adversarial_and_ACCV_2020_supplemental.zip › dataset/Office-Home/Product/calculator/00041.jpg]

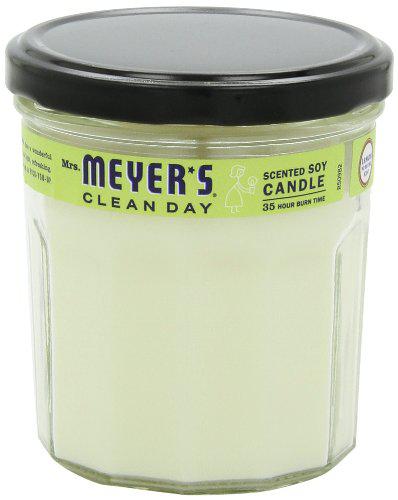

Supplement: Supplementary file 10 [file Raab_Bridging_Adversarial_and_ACCV_2020_supplemental.zip › dataset/Office-Home/Product/candles/00001.jpg]

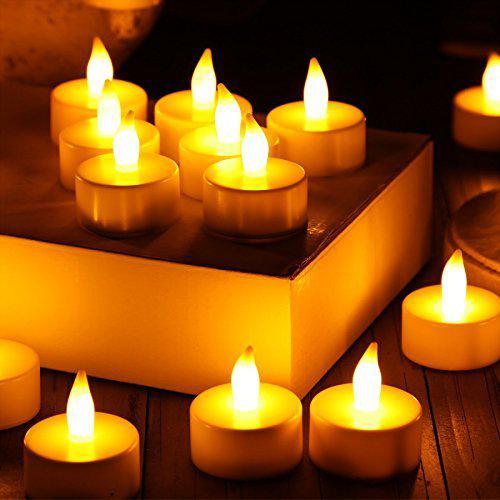

Supplement: Supplementary file 10 [file Raab_Bridging_Adversarial_and_ACCV_2020_supplemental.zip › dataset/Office-Home/Product/candles/00002.jpg]

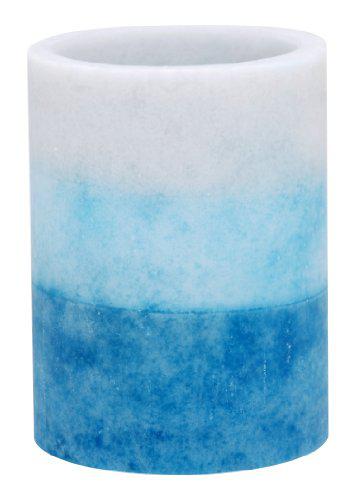

Supplement: Supplementary file 10 [file Raab_Bridging_Adversarial_and_ACCV_2020_supplemental.zip › dataset/Office-Home/Product/candles/00053.jpg]

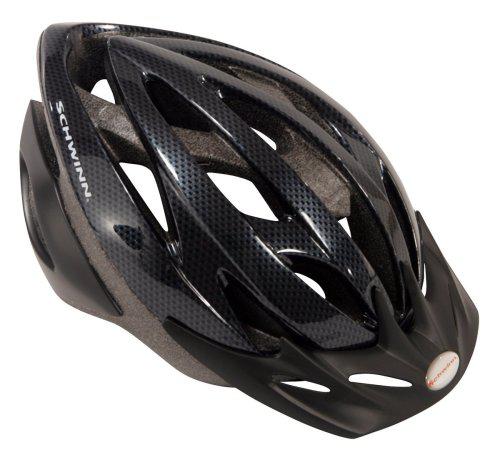

Supplement: Supplementary file 10 [file Raab_Bridging_Adversarial_and_ACCV_2020_supplemental.zip › dataset/Office-Home/Product/helmet/00001.jpg]

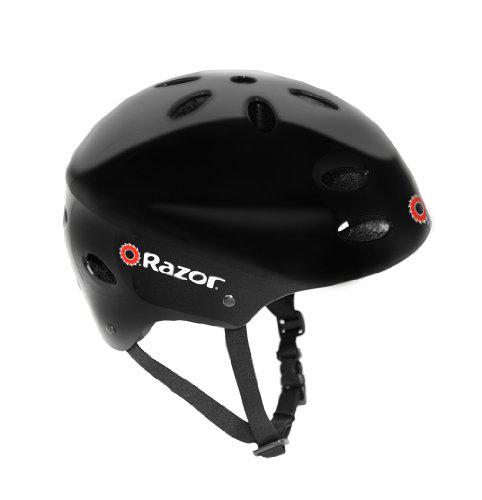

Supplement: Supplementary file 10 [file Raab_Bridging_Adversarial_and_ACCV_2020_supplemental.zip › dataset/Office-Home/Product/helmet/00002.jpg]

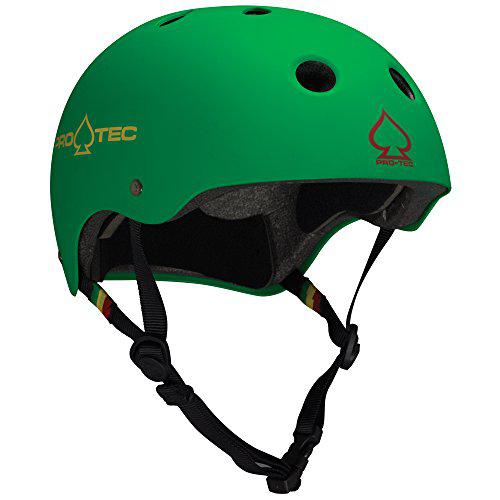

Supplement: Supplementary file 10 [file Raab_Bridging_Adversarial_and_ACCV_2020_supplemental.zip › dataset/Office-Home/Product/helmet/00035.jpg]

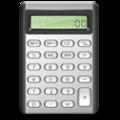

Supplement: Supplementary file 10 [file Raab_Bridging_Adversarial_and_ACCV_2020_supplemental.zip › dataset/Office-Home/Real_World/calculator/00001.jpg]

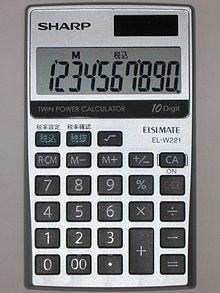

Supplement: Supplementary file 10 [file Raab_Bridging_Adversarial_and_ACCV_2020_supplemental.zip › dataset/Office-Home/Real_World/calculator/00002.jpg]

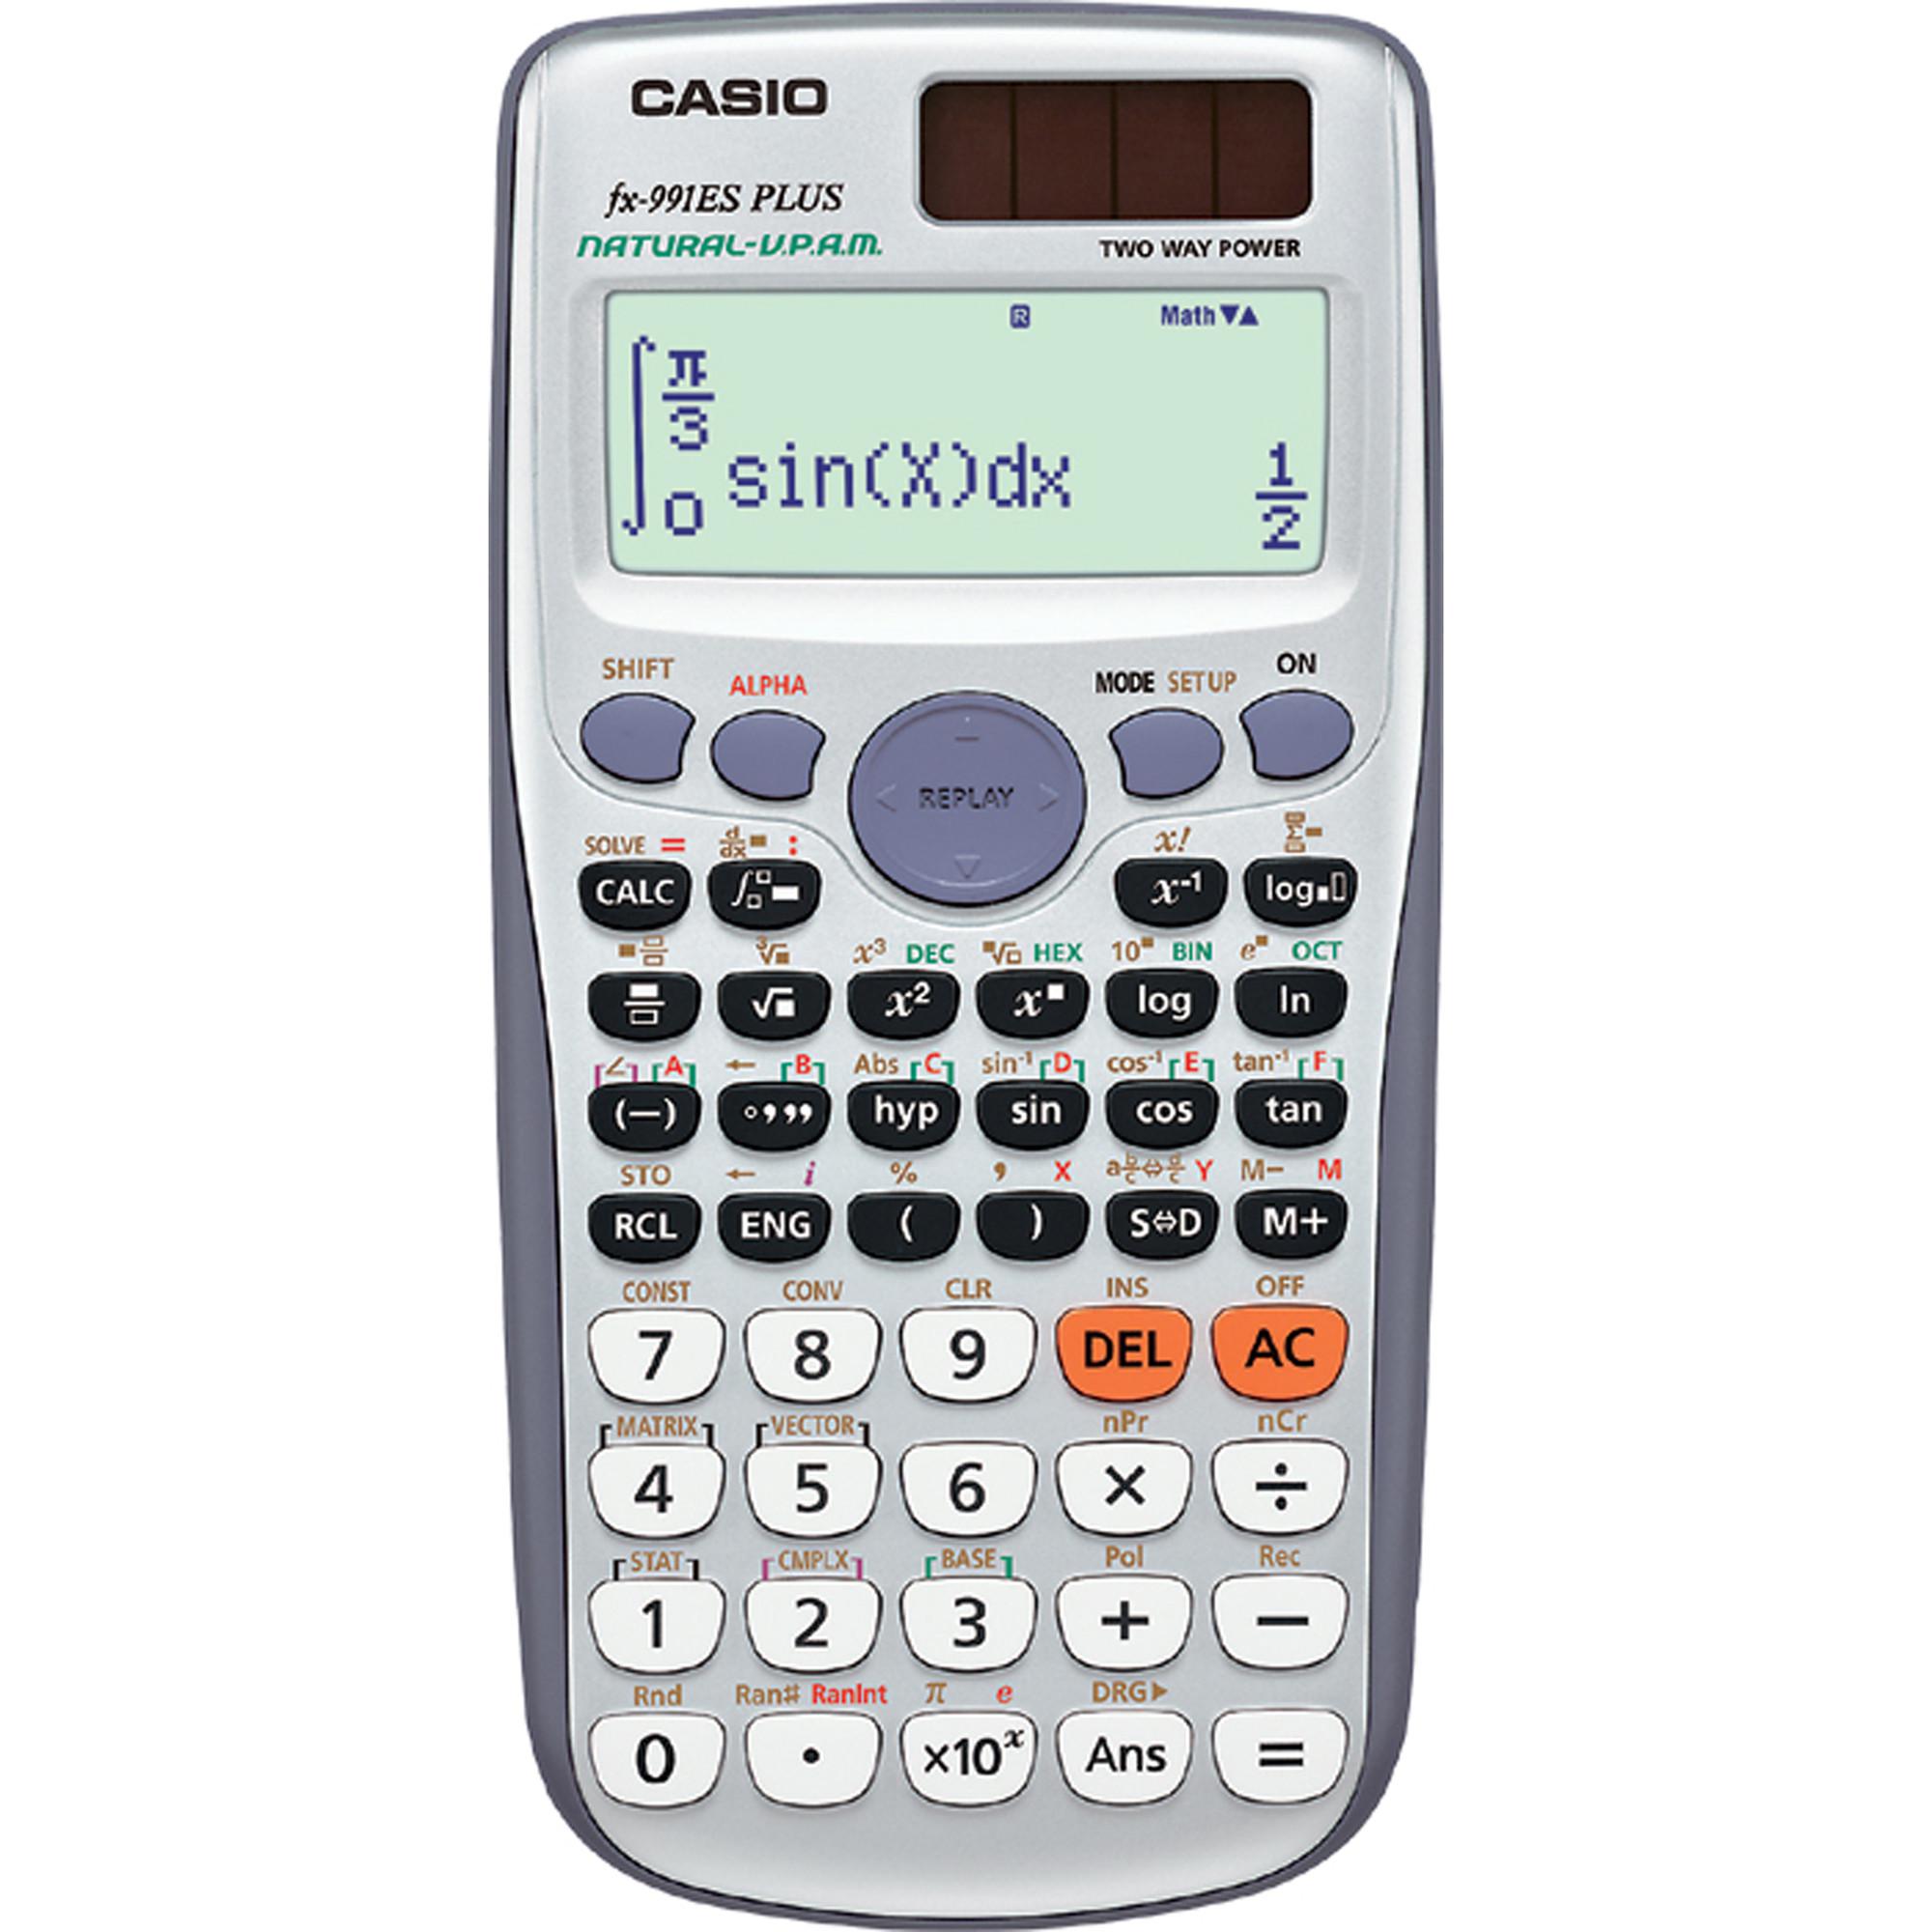

Supplement: Supplementary file 10 [file Raab_Bridging_Adversarial_and_ACCV_2020_supplemental.zip › dataset/Office-Home/Real_World/calculator/00003.jpg]

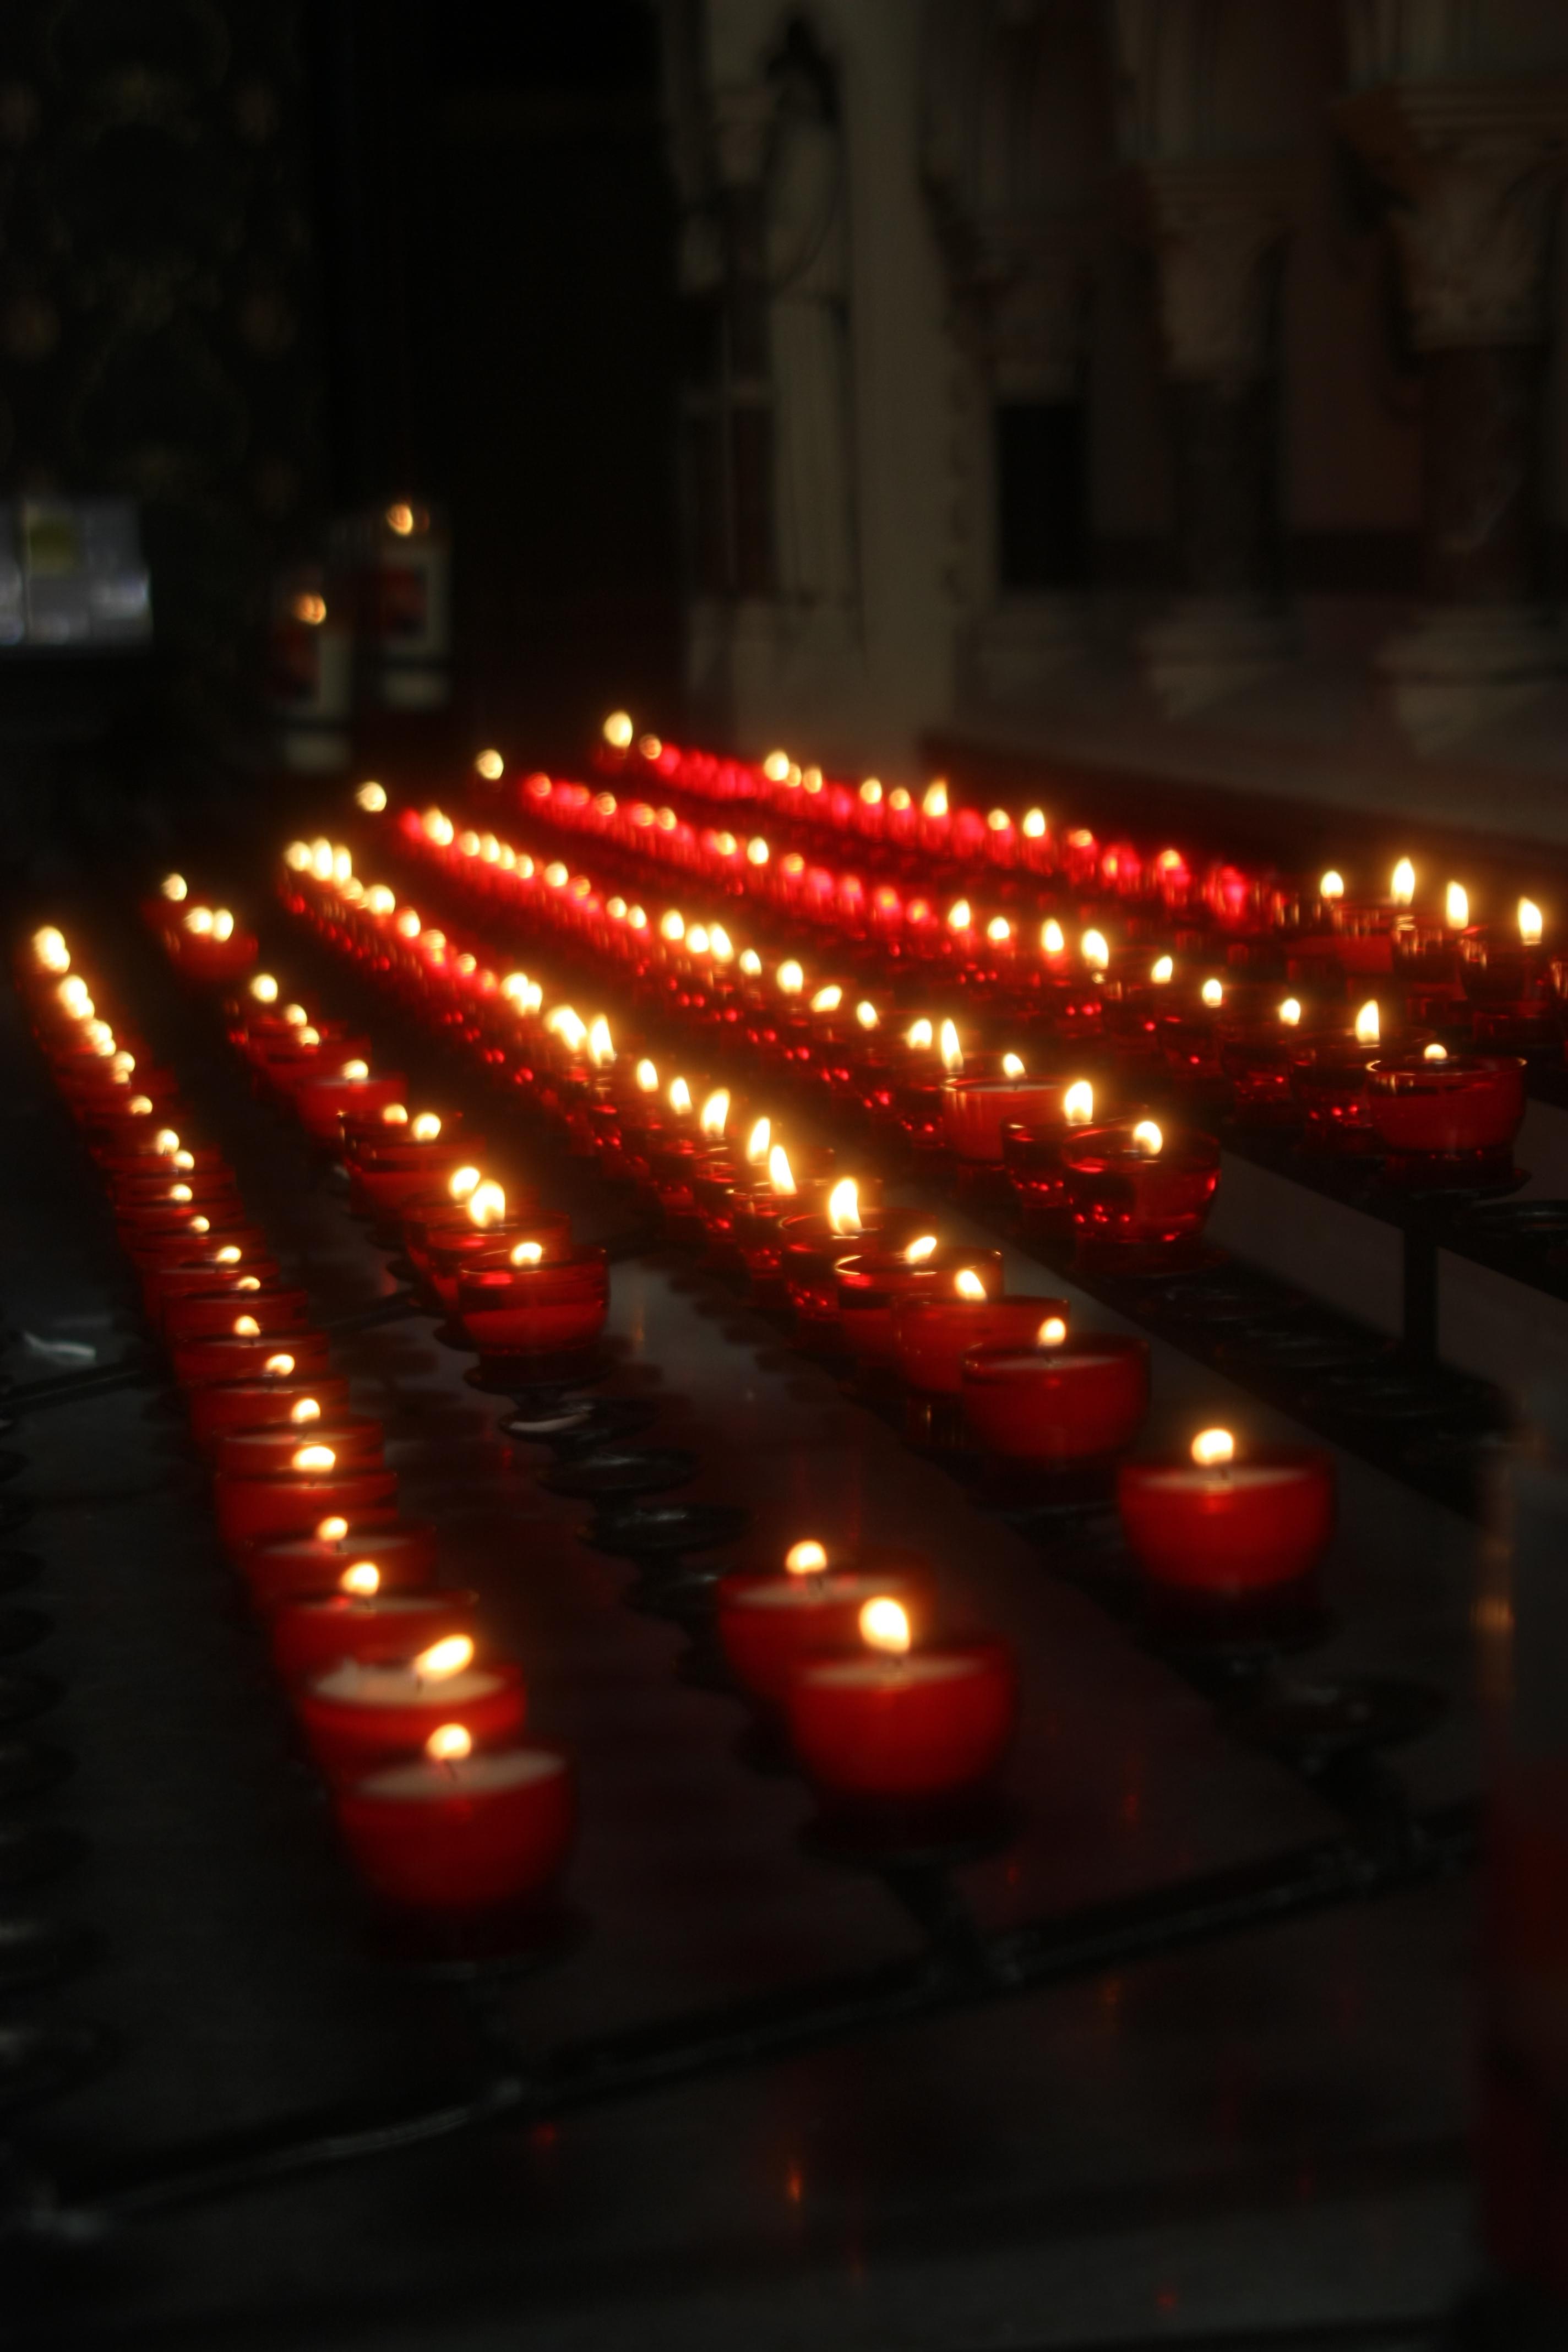

Supplement: Supplementary file 10 [file Raab_Bridging_Adversarial_and_ACCV_2020_supplemental.zip › dataset/Office-Home/Real_World/candles/00068.jpg]

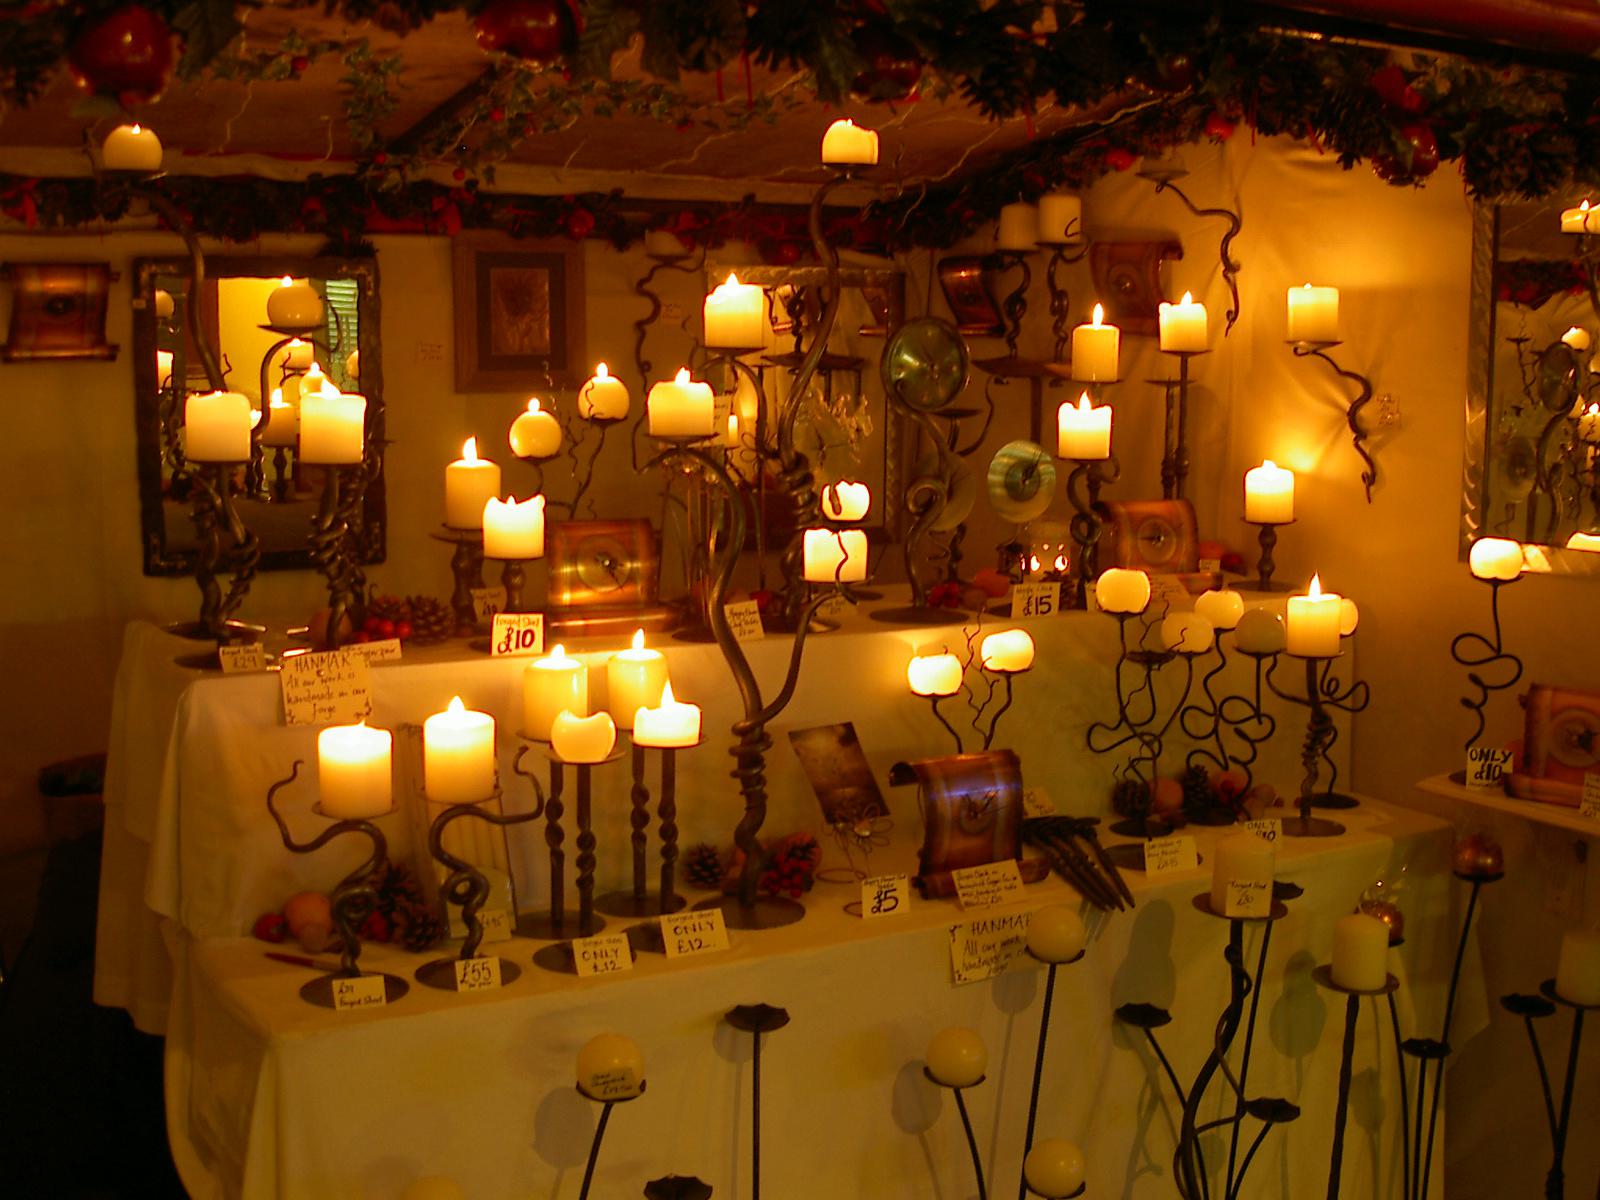

Supplement: Supplementary file 10 [file Raab_Bridging_Adversarial_and_ACCV_2020_supplemental.zip › dataset/Office-Home/Real_World/candles/00074.jpg]

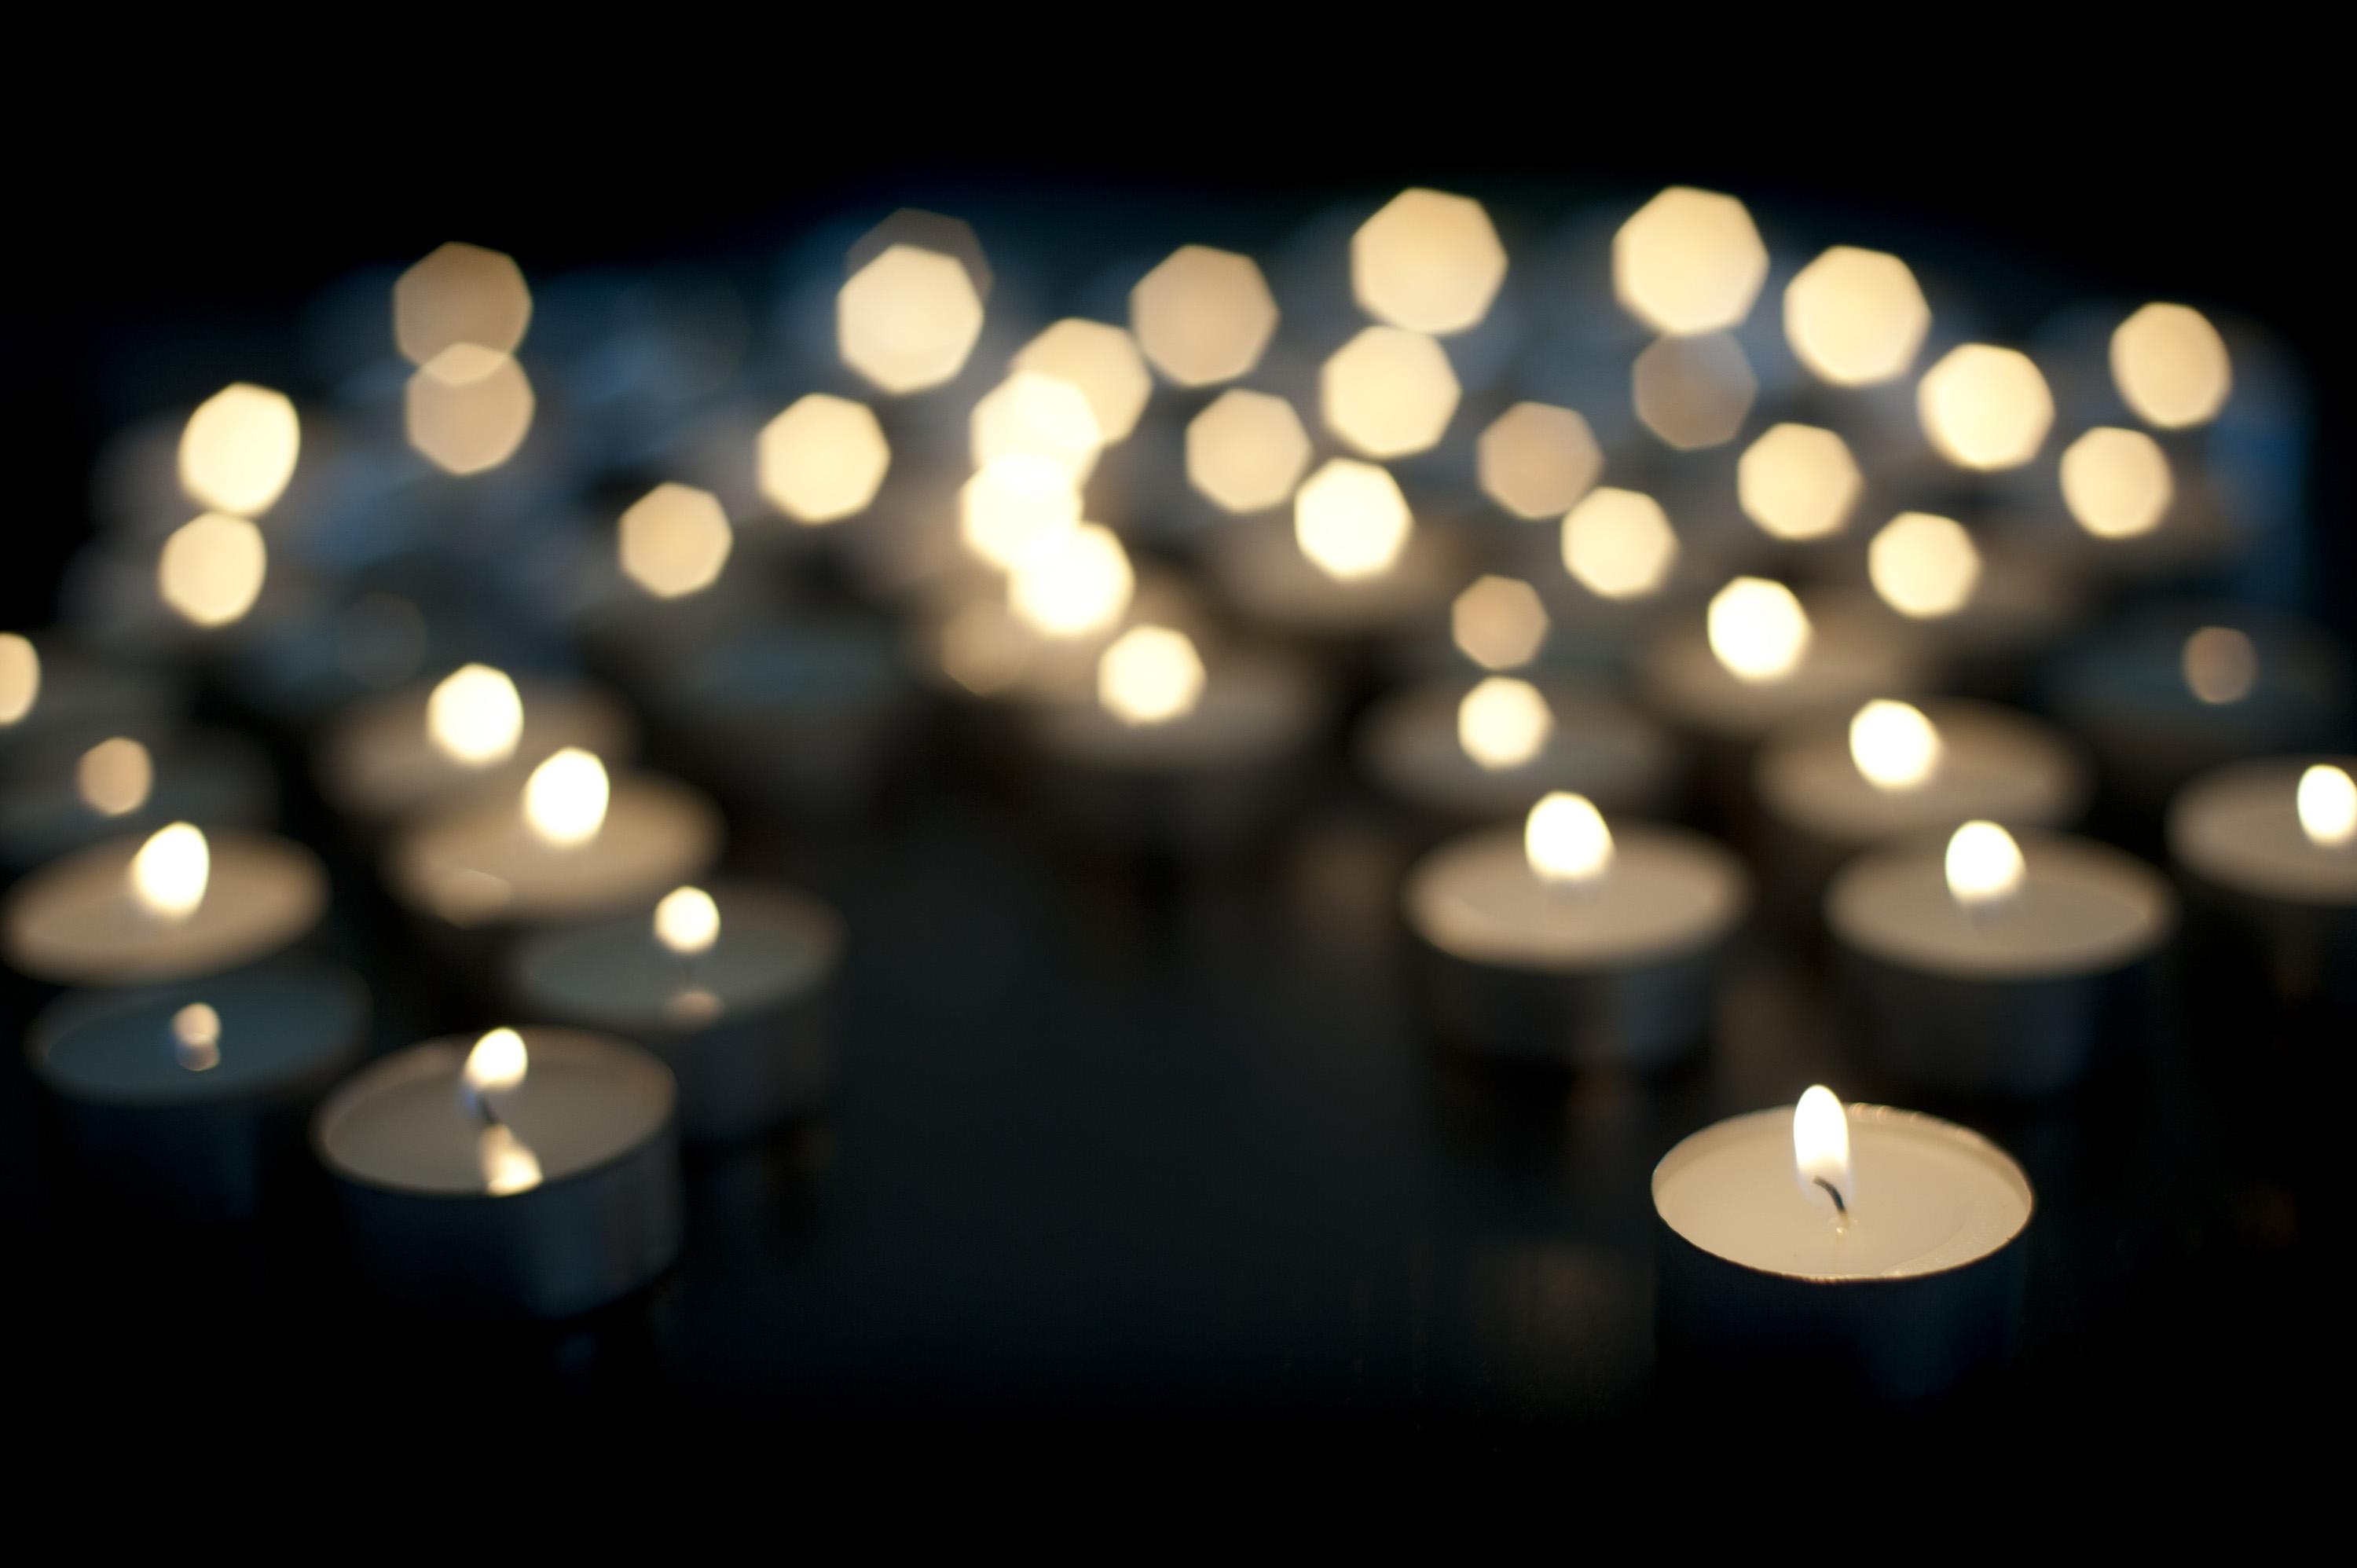

Supplement: Supplementary file 10 [file Raab_Bridging_Adversarial_and_ACCV_2020_supplemental.zip › dataset/Office-Home/Real_World/candles/00097.jpg]

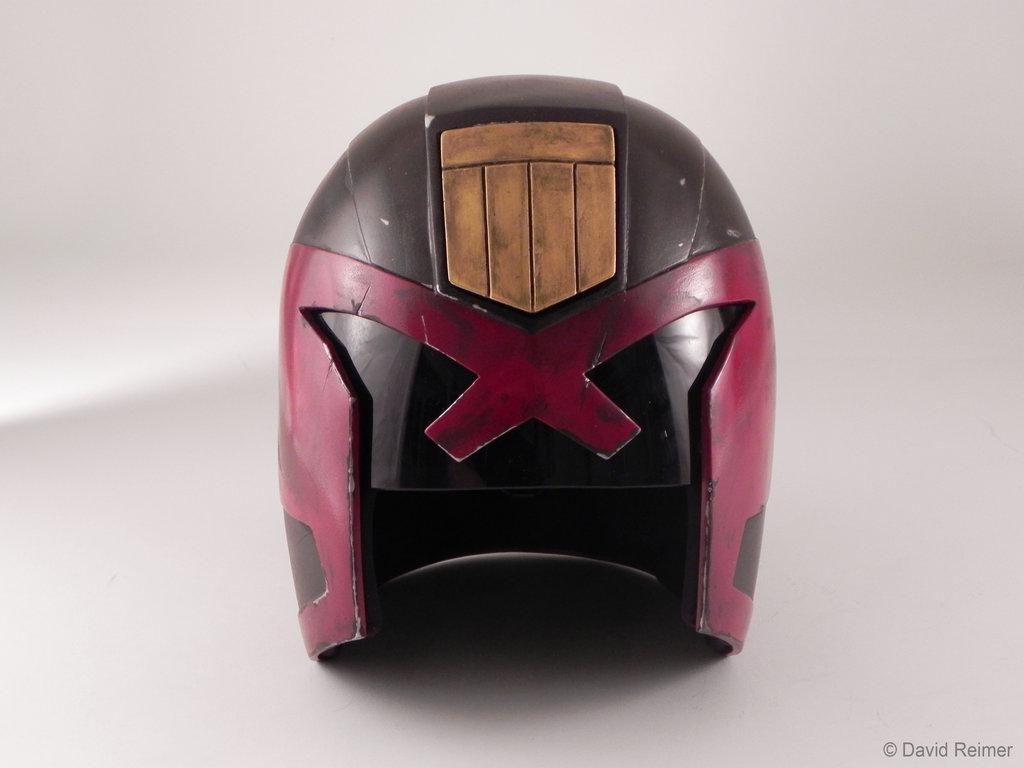

Supplement: Supplementary file 10 [file Raab_Bridging_Adversarial_and_ACCV_2020_supplemental.zip › dataset/Office-Home/Real_World/helmet/00010.jpg]

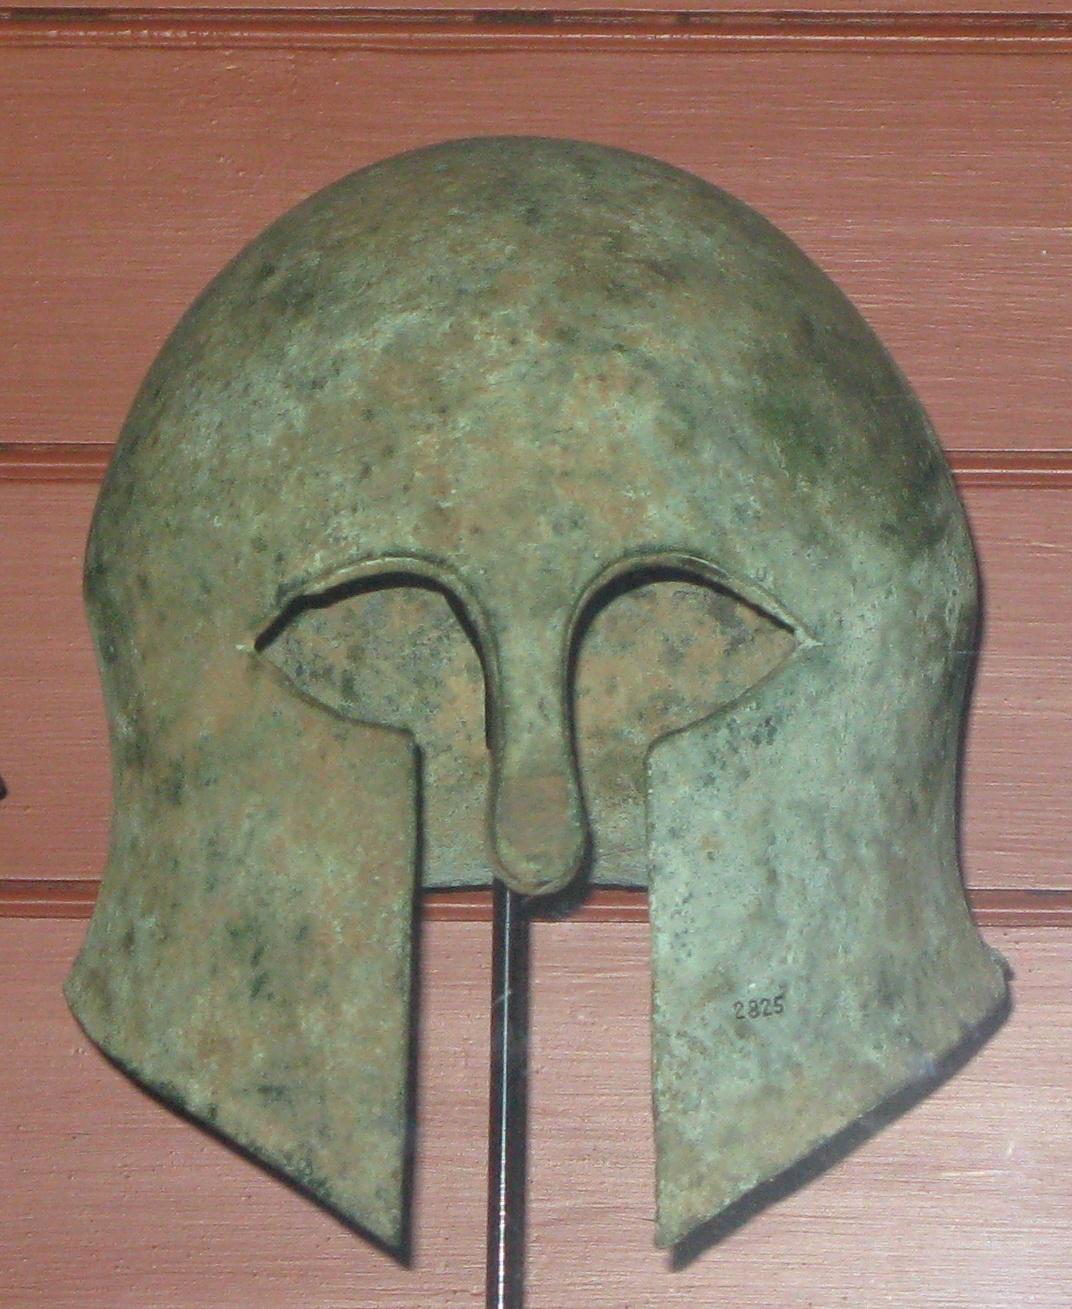

Supplement: Supplementary file 10 [file Raab_Bridging_Adversarial_and_ACCV_2020_supplemental.zip › dataset/Office-Home/Real_World/helmet/00025.jpg]

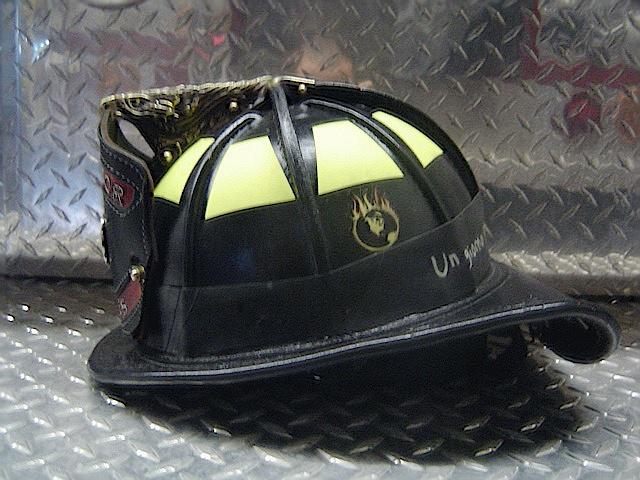

Supplement: Supplementary file 10 [file Raab_Bridging_Adversarial_and_ACCV_2020_supplemental.zip › dataset/Office-Home/Real_World/helmet/00033.jpg]

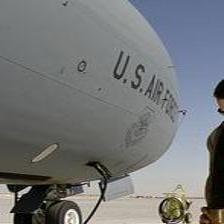

Supplement: Supplementary file 10 [file Raab_Bridging_Adversarial_and_ACCV_2020_supplemental.zip › dataset/visda/real/aeroplane/aeroplane_156302.jpg]

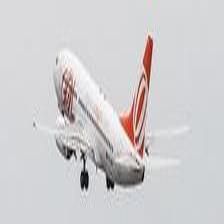

Supplement: Supplementary file 10 [file Raab_Bridging_Adversarial_and_ACCV_2020_supplemental.zip › dataset/visda/real/aeroplane/aeroplane_156317.jpg]

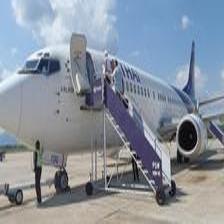

Supplement: Supplementary file 10 [file Raab_Bridging_Adversarial_and_ACCV_2020_supplemental.zip › dataset/visda/real/aeroplane/aeroplane_156332.jpg]

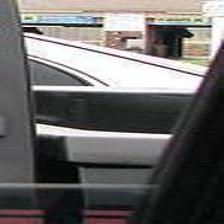

Supplement: Supplementary file 10 [file Raab_Bridging_Adversarial_and_ACCV_2020_supplemental.zip › dataset/visda/real/car/car_131741.jpg]

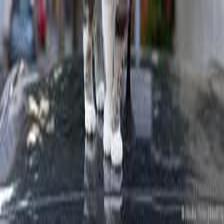

Supplement: Supplementary file 10 [file Raab_Bridging_Adversarial_and_ACCV_2020_supplemental.zip › dataset/visda/real/car/car_131760.jpg]

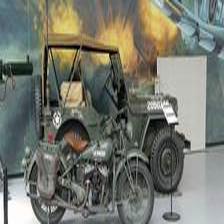

Supplement: Supplementary file 10 [file Raab_Bridging_Adversarial_and_ACCV_2020_supplemental.zip › dataset/visda/real/car/car_131776.jpg]

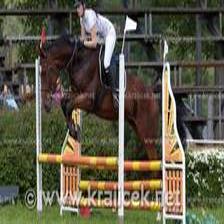

Supplement: Supplementary file 10 [file Raab_Bridging_Adversarial_and_ACCV_2020_supplemental.zip › dataset/visda/real/horse/horse_53418.jpg]

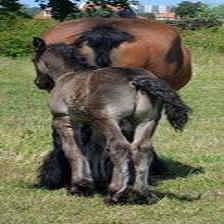

Supplement: Supplementary file 10 [file Raab_Bridging_Adversarial_and_ACCV_2020_supplemental.zip › dataset/visda/real/horse/horse_53430.jpg]

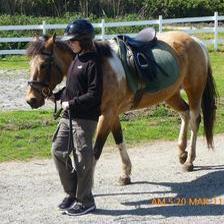

Supplement: Supplementary file 10 [file Raab_Bridging_Adversarial_and_ACCV_2020_supplemental.zip › dataset/visda/real/horse/horse_53455.jpg]

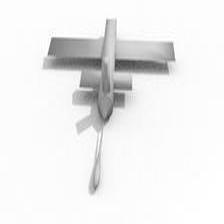

Supplement: Supplementary file 10 [file Raab_Bridging_Adversarial_and_ACCV_2020_supplemental.zip › dataset/visda/synthetic/aeroplane/src_1_02691156_1b0b1d2cb9f9d5c0575bd26acccafabd__10_236_150.png]
